# Supplementary material for: Synthesis of the first nano ionic liquid 1-methylimidazolium trinitromethanide {[HMIM]C(NO2)3} and its catalytic use for Hanztsch four-component condensation
Source: Royal Society of Chemistry journal article supplement (doi:10.1039/c4ra09117e), 2014-10-27

**Synthesis of the first nano ionic liquid 1-methylimidazolium trinitromethanide {[HMIM]C(NO<sub>2</sub>)<sub>3</sub>} and its catalytic use for Hantzsch four-component condensation**

Mohammad Ali Zolfigol,<sup>a,\*</sup> Saeed Baghery,<sup>a</sup> Ahmad Reza Moosavi-Zare,<sup>b,\*</sup> Seyed Mohammad Vahdat,<sup>c</sup> Heshmatollah Alinezhad,<sup>d</sup> Mohammad Norouzi<sup>d</sup>

<sup>a</sup> Faculty of Chemistry, Bu-Ali Sina University, Hamedan 6517838683, Iran

<sup>b</sup> Department of Chemistry, University of Sayyed Jamaledin Asadabadi, Asadabad 6541835583, Iran

<sup>c</sup> Department of Chemistry, Ayatollah Amoli Branch, Islamic Azad University, P.O. Box 678, Amol, Iran

<sup>d</sup> Department of Chemistry, Mazandaran University, Babolsar 47415, Iran

## Table of Contents

|                                                                                                                                                          |    |
|----------------------------------------------------------------------------------------------------------------------------------------------------------|----|
| Fig. S1. The Mass spectrum of 1-methylimidazolium trinitromethanide ass a nano ionic liquid catalyst .....                                               | 7  |
| Fig. S2. The Mass spectrum of 1-methylimidazolium trinitromethanide ass a nano ionic liquid catalyst .....                                               | 7  |
| Fig. S3. Scanning electron microscopy (SEM) of the nano ionic liquid catalyst .....                                                                      | 8  |
| Fig. S4. The <sup>1</sup> H NMR spectrum of 1-methylimidazolium trinitromethanide ass a nano ionic liquid catalyst after recycling.....                  | 8  |
| Fig. S5. The <sup>13</sup> C NMR spectrum of 1-methylimidazolium trinitromethanide ass a nano ionic liquid catalyst after recycling.....                 | 9  |
| Fig. S6. The transmission electron microscopy (TEM) of 1-methylimidazolium trinitromethanide ass a nano ionic liquid catalyst after recycling.....       | 9  |
| Fig. S7. The IR spectrum of methyl 4-(2,5-dimethoxyphenyl)-2-methyl-5-oxo-1,4,5,6,7,8-hexahydroquinoline-3-carboxylate (5a) .....                        | 10 |
| Fig. S8. The <sup>1</sup> H NMR spectrum of methyl 4-(2,5-dimethoxyphenyl)-2-methyl-5-oxo-1,4,5,6,7,8-hexahydroquinoline-3-carboxylate (5a).....         | 10 |
| Fig. S9. The <sup>1</sup> H NMR spectrum of methyl 4-(2,5-dimethoxyphenyl)-2-methyl-5-oxo-1,4,5,6,7,8-hexahydroquinoline-3-carboxylate (5a).....         | 11 |
| Fig. S10. The <sup>13</sup> C NMR spectrum of methyl 4-(2,5-dimethoxyphenyl)-2-methyl-5-oxo-1,4,5,6,7,8-hexahydroquinoline-3-carboxylate (5a).....       | 12 |
| Fig. S11. The Mass spectrum of methyl 4-(2,5-dimethoxyphenyl)-2-methyl-5-oxo-1,4,5,6,7,8-hexahydroquinoline-3-carboxylate (5a).....                      | 12 |
| Fig. S12. The IR spectrum of methyl 4-(4-hydroxy-3-methoxyphenyl)-2-methyl-5-oxo-1,4,5,6,7,8-hexahydroquinoline-3-carboxylate (5b).....                  | 13 |
| Fig. S13. The <sup>1</sup> H NMR spectrum of methyl 4-(4-hydroxy-3-methoxyphenyl)-2-methyl-5-oxo-1,4,5,6,7,8-hexahydroquinoline-3-carboxylate (5b).....  | 14 |
| Fig. S14. The <sup>1</sup> H NMR spectrum of methyl 4-(4-hydroxy-3-methoxyphenyl)-2-methyl-5-oxo-1,4,5,6,7,8-hexahydroquinoline-3-carboxylate (5b).....  | 15 |
| Fig. S15. The <sup>13</sup> C NMR spectrum of methyl 4-(4-hydroxy-3-methoxyphenyl)-2-methyl-5-oxo-1,4,5,6,7,8-hexahydroquinoline-3-carboxylate (5b)..... | 15 |
| Fig. S16. The <sup>13</sup> C NMR spectrum of methyl 4-(4-hydroxy-3-methoxyphenyl)-2-methyl-5-oxo-1,4,5,6,7,8-hexahydroquinoline-3-carboxylate (5b)..... | 16 |
| Fig. S17. The Mass spectrum of 1 methyl 4-(4-hydroxy-3-methoxyphenyl)-2-methyl-5-oxo-1,4,5,6,7,8-hexahydroquinoline-3-carboxylate (5b).....              | 16 |
| Fig. S18. The IR spectrum of methyl 4-(4-(dimethylamino)phenyl)-2-methyl-5-oxo-1,4,5,6,7,8-hexahydroquinoline-3-carboxylate (5c).....                    | 17 |
| Fig. S19. The <sup>1</sup> H NMR spectrum of methyl 4-(4-(dimethylamino)phenyl)-2-methyl-5-oxo-1,4,5,6,7,8-hexahydroquinoline-3-carboxylate (5c).....    | 17 |
| Fig. S20. The <sup>1</sup> H NMR spectrum of methyl 4-(4-(dimethylamino)phenyl)-2-methyl-5-oxo-1,4,5,6,7,8-hexahydroquinoline-3-carboxylate (5c).....    | 18 |
| Fig. S21. The <sup>13</sup> C NMR spectrum of methyl 4-(4-(dimethylamino)phenyl)-2-methyl-5-oxo-1,4,5,6,7,8-hexahydroquinoline-3-carboxylate (5c).....   | 19 |
| Fig. S22. The <sup>13</sup> C NMR spectrum of methyl 4-(4-(dimethylamino)phenyl)-2-methyl-5-oxo-1,4,5,6,7,8-hexahydroquinoline-3-carboxylate (5c).....   | 20 |
| Fig. S23. The Mass spectrum of methyl 4-(4-(dimethylamino)phenyl)-2-methyl-5-oxo-1,4,5,6,7,8-hexahydroquinoline-3-carboxylate (5c).....                  | 20 |
| Fig. S24. The IR spectrum of methyl 4-(biphenyl-4-yl)-2,7,7-trimethyl-5-oxo-1,4,5,6,7,8-hexahydroquinoline-3-carboxylate (5d) .....                      | 21 |
| Fig. S25. The <sup>1</sup> H NMR spectrum of methyl 4-(biphenyl-4-yl)-2,7,7-trimethyl-5-oxo-1,4,5,6,7,8-hexahydroquinoline-3-carboxylate (5d).....       | 21 |
| Fig. S26. The <sup>1</sup> H NMR spectrum of methyl 4-(biphenyl-4-yl)-2,7,7-trimethyl-5-oxo-1,4,5,6,7,8-hexahydroquinoline-3-carboxylate (5d).....       | 22 |

|                                                                                                                                                                 |    |
|-----------------------------------------------------------------------------------------------------------------------------------------------------------------|----|
| Fig. S27. The <sup>13</sup> C NMR spectrum of methyl 4-(biphenyl-4-yl)-2,7,7-trimethyl-5-oxo-1,4,5,6,7,8-hexahydroquinoline-3-carboxylate (5d).....             | 23 |
| Fig. S28. The <sup>13</sup> C NMR spectrum of methyl 4-(biphenyl-4-yl)-2,7,7-trimethyl-5-oxo-1,4,5,6,7,8-hexahydroquinoline-3-carboxylate (5d).....             | 24 |
| Fig. S29. The Mass spectrum of methyl 4-(biphenyl-4-yl)-2,7,7-trimethyl-5-oxo-1,4,5,6,7,8-hexahydroquinoline-3-carboxylate (5d).....                            | 24 |
| Fig. S30. The IR spectrum of dimethyl 4,4'-(1,4-phenylene)bis(2,7,7-trimethyl-5-oxo-1,4,5,6,7,8-hexahydroquinoline-3-carboxylate) (5e).....                     | 25 |
| Fig. S31. The <sup>1</sup> H NMR spectrum of dimethyl 4,4'-(1,4-phenylene)bis(2,7,7-trimethyl-5-oxo-1,4,5,6,7,8-hexahydroquinoline-3-carboxylate) (5e).....     | 25 |
| Fig. S32. The <sup>13</sup> C NMR spectrum of dimethyl 4,4'-(1,4-phenylene)bis(2,7,7-trimethyl-5-oxo-1,4,5,6,7,8-hexahydroquinoline-3-carboxylate) (5e).....    | 26 |
| Fig. S33. The <sup>13</sup> C NMR spectrum of dimethyl 4,4'-(1,4-phenylene)bis(2,7,7-trimethyl-5-oxo-1,4,5,6,7,8-hexahydroquinoline-3-carboxylate) (5e).....    | 27 |
| Fig. S34. The Mass spectrum of dimethyl 4,4'-(1,4-phenylene)bis(2,7,7-trimethyl-5-oxo-1,4,5,6,7,8-hexahydroquinoline-3-carboxylate) (5e).....                   | 27 |
| Fig. S35. The IR spectrum of methyl 4-(2,5-dimethoxyphenyl)-2,7,7-trimethyl-5-oxo-1,4,5,6,7,8-hexahydroquinoline-3-carboxylate (5f).....                        | 28 |
| Fig. S36. The <sup>1</sup> H NMR spectrum of methyl 4-(2,5-dimethoxyphenyl)-2,7,7-trimethyl-5-oxo-1,4,5,6,7,8-hexahydroquinoline-3-carboxylate (5f).....        | 28 |
| Fig. S37. The <sup>1</sup> H NMR spectrum of methyl 4-(2,5-dimethoxyphenyl)-2,7,7-trimethyl-5-oxo-1,4,5,6,7,8-hexahydroquinoline-3-carboxylate (5f).....        | 29 |
| Fig. S38. The <sup>13</sup> C NMR spectrum of methyl 4-(2,5-dimethoxyphenyl)-2,7,7-trimethyl-5-oxo-1,4,5,6,7,8-hexahydroquinoline-3-carboxylate (5f).....       | 30 |
| Fig. S39. The <sup>13</sup> C NMR spectrum of methyl 4-(2,5-dimethoxyphenyl)-2,7,7-trimethyl-5-oxo-1,4,5,6,7,8-hexahydroquinoline-3-carboxylate (5f).....       | 31 |
| Fig. S40. The Mass spectrum of methyl 4-(2,5-dimethoxyphenyl)-2,7,7-trimethyl-5-oxo-1,4,5,6,7,8-hexahydroquinoline-3-carboxylate (5f).....                      | 31 |
| Fig. S41. The IR spectrum of methyl 2,7,7-trimethyl-5-oxo-4-(1-phenylprop-1-en-2-yl)-1,4,5,6,7,8-hexahydroquinoline-3-carboxylate (5g).....                     | 32 |
| Fig. S42. The <sup>1</sup> H NMR spectrum of methyl 2,7,7-trimethyl-5-oxo-4-(1-phenylprop-1-en-2-yl)-1,4,5,6,7,8-hexahydroquinoline-3-carboxylate (5g).....     | 32 |
| Fig. S43. The <sup>1</sup> H NMR spectrum of methyl 2,7,7-trimethyl-5-oxo-4-(1-phenylprop-1-en-2-yl)-1,4,5,6,7,8-hexahydroquinoline-3-carboxylate (5g).....     | 33 |
| Fig. S44. The <sup>13</sup> C NMR spectrum of methyl 2,7,7-trimethyl-5-oxo-4-(1-phenylprop-1-en-2-yl)-1,4,5,6,7,8-hexahydroquinoline-3-carboxylate (5g).....    | 34 |
| Fig. S45. The <sup>13</sup> C NMR spectrum of methyl 2,7,7-trimethyl-5-oxo-4-(1-phenylprop-1-en-2-yl)-1,4,5,6,7,8-hexahydroquinoline-3-carboxylate (5g).....    | 35 |
| Fig. S46. The Mass spectrum of methyl 2,7,7-trimethyl-5-oxo-4-(1-phenylprop-1-en-2-yl)-1,4,5,6,7,8-hexahydroquinoline-3-carboxylate (5g).....                   | 35 |
| Fig. S47. The IR spectrum of methyl 4-(4-hydroxy-3-methoxyphenyl)-2,7,7-trimethyl-5-oxo-1,4,5,6,7,8-hexahydroquinoline-3-carboxylate (5h).....                  | 36 |
| Fig. S48. The <sup>1</sup> H NMR spectrum of methyl 4-(4-hydroxy-3-methoxyphenyl)-2,7,7-trimethyl-5-oxo-1,4,5,6,7,8-hexahydroquinoline-3-carboxylate (5h).....  | 36 |
| Fig. S49. The <sup>1</sup> H NMR spectrum of methyl 4-(4-hydroxy-3-methoxyphenyl)-2,7,7-trimethyl-5-oxo-1,4,5,6,7,8-hexahydroquinoline-3-carboxylate (5h).....  | 37 |
| Fig. S50. The <sup>13</sup> C NMR spectrum of methyl 4-(4-hydroxy-3-methoxyphenyl)-2,7,7-trimethyl-5-oxo-1,4,5,6,7,8-hexahydroquinoline-3-carboxylate (5h)..... | 38 |
| Fig. S51. The <sup>13</sup> C NMR spectrum of methyl 4-(4-hydroxy-3-methoxyphenyl)-2,7,7-trimethyl-5-oxo-1,4,5,6,7,8-hexahydroquinoline-3-carboxylate (5h)..... | 39 |
| Fig. S52. The Mass spectrum of methyl 4-(4-hydroxy-3-methoxyphenyl)-2,7,7-trimethyl-5-oxo-1,4,5,6,7,8-hexahydroquinoline-3-carboxylate (5h).....                | 39 |

|                                                                                                                                                               |    |
|---------------------------------------------------------------------------------------------------------------------------------------------------------------|----|
| Fig. S53. The IR spectrum of methyl 4-(4-(dimethylamino)phenyl)-2,7,7-trimethyl-5-oxo-1,4,5,6,7,8-hexahydroquinoline-3-carboxylate (5i).....                  | 40 |
| Fig. S54. The <sup>1</sup> H NMR spectrum of methyl 4-(4-(dimethylamino)phenyl)-2,7,7-trimethyl-5-oxo-1,4,5,6,7,8-hexahydroquinoline-3-carboxylate (5i).....  | 40 |
| Fig. S55. The <sup>1</sup> H NMR spectrum of methyl 4-(4-(dimethylamino)phenyl)-2,7,7-trimethyl-5-oxo-1,4,5,6,7,8-hexahydroquinoline-3-carboxylate (5i).....  | 41 |
| Fig. S56. The <sup>13</sup> C NMR spectrum of methyl 4-(4-(dimethylamino)phenyl)-2,7,7-trimethyl-5-oxo-1,4,5,6,7,8-hexahydroquinoline-3-carboxylate (5i)..... | 42 |
| Fig. S57. The Mass spectrum of methyl 4-(4-(dimethylamino)phenyl)-2,7,7-trimethyl-5-oxo-1,4,5,6,7,8-hexahydroquinoline-3-carboxylate (5i).....                | 42 |
| Fig. S58. The IR spectrum of ethyl 4-(2,5-dimethoxyphenyl)-2-methyl-5-oxo-1,4,5,6,7,8-hexahydroquinoline-3-carboxylate (6a).....                              | 43 |
| Fig. S59. The <sup>1</sup> H NMR spectrum of ethyl 4-(2,5-dimethoxyphenyl)-2-methyl-5-oxo-1,4,5,6,7,8-hexahydroquinoline-3-carboxylate (6a).....              | 43 |
| Fig. S60. The <sup>1</sup> H NMR spectrum of ethyl 4-(2,5-dimethoxyphenyl)-2-methyl-5-oxo-1,4,5,6,7,8-hexahydroquinoline-3-carboxylate (6a).....              | 44 |
| Fig. S61. The <sup>13</sup> C NMR spectrum of ethyl 4-(2,5-dimethoxyphenyl)-2-methyl-5-oxo-1,4,5,6,7,8-hexahydroquinoline-3-carboxylate (6a).....             | 45 |
| Fig. S62. The <sup>13</sup> C NMR spectrum of ethyl 4-(2,5-dimethoxyphenyl)-2-methyl-5-oxo-1,4,5,6,7,8-hexahydroquinoline-3-carboxylate (6a).....             | 46 |
| Fig. S63. The Mass spectrum of ethyl 4-(2,5-dimethoxyphenyl)-2-methyl-5-oxo-1,4,5,6,7,8-hexahydroquinoline-3-carboxylate (6a).....                            | 46 |
| Fig. S64. The IR spectrum of ethyl 4-(biphenyl-4-yl)-2,7,7-trimethyl-5-oxo-1,4,5,6,7,8-hexahydroquinoline-3-carboxylate (6b).....                             | 47 |
| Fig. S65. The <sup>1</sup> H NMR spectrum of ethyl 4-(biphenyl-4-yl)-2,7,7-trimethyl-5-oxo-1,4,5,6,7,8-hexahydroquinoline-3-carboxylate (6b).....             | 47 |
| Fig. S66. The <sup>1</sup> H NMR spectrum of ethyl 4-(biphenyl-4-yl)-2,7,7-trimethyl-5-oxo-1,4,5,6,7,8-hexahydroquinoline-3-carboxylate (6b).....             | 48 |
| Fig. S67. The <sup>13</sup> C NMR spectrum of ethyl 4-(biphenyl-4-yl)-2,7,7-trimethyl-5-oxo-1,4,5,6,7,8-hexahydroquinoline-3-carboxylate (6b).....            | 49 |
| Fig. S68. The Mass spectrum of ethyl 4-(biphenyl-4-yl)-2,7,7-trimethyl-5-oxo-1,4,5,6,7,8-hexahydroquinoline-3-carboxylate (6b).....                           | 49 |
| Fig. S69. The IR spectrum of diethyl 4,4'-(1,4-phenylene)bis(2,7,7-trimethyl-5-oxo-1,4,5,6,7,8-hexahydroquinoline-3-carboxylate) (6c).....                    | 50 |
| Fig. S70. The <sup>1</sup> H NMR spectrum of diethyl 4,4'-(1,4-phenylene)bis(2,7,7-trimethyl-5-oxo-1,4,5,6,7,8-hexahydroquinoline-3-carboxylate) (6c).....    | 50 |
| Fig. S71. The <sup>1</sup> H NMR spectrum of diethyl 4,4'-(1,4-phenylene)bis(2,7,7-trimethyl-5-oxo-1,4,5,6,7,8-hexahydroquinoline-3-carboxylate) (6c).....    | 51 |
| Fig. S72. The <sup>13</sup> C NMR spectrum of diethyl 4,4'-(1,4-phenylene)bis(2,7,7-trimethyl-5-oxo-1,4,5,6,7,8-hexahydroquinoline-3-carboxylate) (6c).....   | 52 |
| Fig. S73. The <sup>13</sup> C NMR spectrum of diethyl 4,4'-(1,4-phenylene)bis(2,7,7-trimethyl-5-oxo-1,4,5,6,7,8-hexahydroquinoline-3-carboxylate) (6c).....   | 53 |
| Fig. S74. The Mass spectrum of diethyl 4,4'-(1,4-phenylene)bis(2,7,7-trimethyl-5-oxo-1,4,5,6,7,8-hexahydroquinoline-3-carboxylate) (6c).....                  | 53 |
| Fig. S75. The IR spectrum of ethyl 4-(2,5-dimethoxyphenyl)-2,7,7-trimethyl-5-oxo-1,4,5,6,7,8-hexahydroquinoline-3-carboxylate (6d).....                       | 54 |
| Fig. S76. The <sup>1</sup> H NMR spectrum of ethyl 4-(2,5-dimethoxyphenyl)-2,7,7-trimethyl-5-oxo-1,4,5,6,7,8-hexahydroquinoline-3-carboxylate (6d).....       | 54 |
| Fig. S77. The <sup>1</sup> H NMR spectrum of ethyl 4-(2,5-dimethoxyphenyl)-2,7,7-trimethyl-5-oxo-1,4,5,6,7,8-hexahydroquinoline-3-carboxylate (6d).....       | 55 |
| Fig. S78. The <sup>13</sup> C NMR spectrum of ethyl 4-(2,5-dimethoxyphenyl)-2,7,7-trimethyl-5-oxo-1,4,5,6,7,8-hexahydroquinoline-3-carboxylate (6d).....      | 56 |

|                                                                                                                                                             |    |
|-------------------------------------------------------------------------------------------------------------------------------------------------------------|----|
| Fig. S79. The Mass spectrum of ethyl 4-(2,5-dimethoxyphenyl)-2,7,7-trimethyl-5-oxo-1,4,5,6,7,8-hexahydroquinoline-3-carboxylate (6d).....                   | 56 |
| Fig. S80. The IR spectrum of ethyl 2,7,7-trimethyl-5-oxo-4-(1-phenylprop-1-en-2-yl)-1,4,5,6,7,8-hexahydroquinoline-3-carboxylate (6e).....                  | 57 |
| Fig. S81. The <sup>1</sup> H NMR spectrum of ethyl 2,7,7-trimethyl-5-oxo-4-(1-phenylprop-1-en-2-yl)-1,4,5,6,7,8-hexahydroquinoline-3-carboxylate (6e).....  | 57 |
| Fig. S82. The <sup>1</sup> H NMR spectrum of ethyl 2,7,7-trimethyl-5-oxo-4-(1-phenylprop-1-en-2-yl)-1,4,5,6,7,8-hexahydroquinoline-3-carboxylate (6e).....  | 58 |
| Fig. S83. The <sup>13</sup> C NMR spectrum of ethyl 2,7,7-trimethyl-5-oxo-4-(1-phenylprop-1-en-2-yl)-1,4,5,6,7,8-hexahydroquinoline-3-carboxylate (6e)..... | 59 |
| Fig. S84. The <sup>13</sup> C NMR spectrum of ethyl 2,7,7-trimethyl-5-oxo-4-(1-phenylprop-1-en-2-yl)-1,4,5,6,7,8-hexahydroquinoline-3-carboxylate (6e)..... | 60 |
| Fig. S85. The Mass spectrum of ethyl 2,7,7-trimethyl-5-oxo-4-(1-phenylprop-1-en-2-yl)-1,4,5,6,7,8-hexahydroquinoline-3-carboxylate (6e).....                | 60 |
| Fig. S86. The IR spectrum of ethyl 2-amino-4-(2,4-dinitrophenyl)-5-oxo-1,4,5,6,7,8-hexahydroquinoline-3-carboxylate (7a).....                               | 61 |
| Fig. S87. The <sup>1</sup> H NMR spectrum of ethyl 2-amino-4-(2,4-dinitrophenyl)-5-oxo-1,4,5,6,7,8-hexahydroquinoline-3-carboxylate (7a).....               | 61 |
| Fig. S88. The <sup>1</sup> H NMR spectrum of ethyl 2-amino-4-(2,4-dinitrophenyl)-5-oxo-1,4,5,6,7,8-hexahydroquinoline-3-carboxylate (7a).....               | 62 |
| Fig. S89. The <sup>13</sup> C NMR spectrum of ethyl 2-amino-4-(2,4-dinitrophenyl)-5-oxo-1,4,5,6,7,8-hexahydroquinoline-3-carboxylate (7a).....              | 63 |
| Fig. S90. The Mass spectrum of ethyl 2-amino-4-(2,4-dinitrophenyl)-5-oxo-1,4,5,6,7,8-hexahydroquinoline-3-carboxylate (7a).....                             | 63 |
| Fig. S91. The IR spectrum of ethyl 2-amino-4-(4-hydroxy-3-methoxyphenyl)-5-oxo-1,4,5,6,7,8-hexahydroquinoline-3-carboxylate (7b).....                       | 64 |
| Fig. S92. The <sup>1</sup> H NMR spectrum of ethyl 2-amino-4-(4-hydroxy-3-methoxyphenyl)-5-oxo-1,4,5,6,7,8-hexahydroquinoline-3-carboxylate (7b).....       | 64 |
| Fig. S93. The <sup>13</sup> C NMR spectrum of ethyl 2-amino-4-(4-hydroxy-3-methoxyphenyl)-5-oxo-1,4,5,6,7,8-hexahydroquinoline-3-carboxylate (7b).....      | 65 |
| Fig. S94. The Mass spectrum of ethyl 2-amino-4-(4-hydroxy-3-methoxyphenyl)-5-oxo-1,4,5,6,7,8-hexahydroquinoline-3-carboxylate (7b).....                     | 65 |
| Fig. S95. The IR spectrum of ethyl 2-amino-4-(4-(dimethylamino)phenyl)-5-oxo-1,4,5,6,7,8-hexahydroquinoline-3-carboxylate (7c).....                         | 66 |
| Fig. S96. The <sup>1</sup> H NMR spectrum of ethyl 2-amino-4-(4-(dimethylamino)phenyl)-5-oxo-1,4,5,6,7,8-hexahydroquinoline-3-carboxylate (7c).....         | 66 |
| Fig. S97. The <sup>1</sup> H NMR spectrum of ethyl 2-amino-4-(4-(dimethylamino)phenyl)-5-oxo-1,4,5,6,7,8-hexahydroquinoline-3-carboxylate (7c).....         | 67 |
| Fig. S98. The <sup>13</sup> C NMR spectrum of ethyl 2-amino-4-(4-(dimethylamino)phenyl)-5-oxo-1,4,5,6,7,8-hexahydroquinoline-3-carboxylate (7c).....        | 68 |
| Fig. S99. The <sup>13</sup> C NMR spectrum of ethyl 2-amino-4-(4-(dimethylamino)phenyl)-5-oxo-1,4,5,6,7,8-hexahydroquinoline-3-carboxylate (7c).....        | 69 |
| Fig. S100. The Mass spectrum of ethyl 2-amino-4-(4-(dimethylamino)phenyl)-5-oxo-1,4,5,6,7,8-hexahydroquinoline-3-carboxylate (7c).....                      | 66 |
| Fig. S101. The IR spectrum of ethyl 2-amino-4-(biphenyl-4-yl)-7,7-dimethyl-5-oxo-1,4,5,6,7,8-hexahydroquinoline-3-carboxylate (7d).....                     | 70 |
| Fig. S102. The <sup>1</sup> H NMR spectrum of ethyl 2-amino-4-(biphenyl-4-yl)-7,7-dimethyl-5-oxo-1,4,5,6,7,8-hexahydroquinoline-3-carboxylate (7d).....     | 70 |
| Fig. S103. The <sup>1</sup> H NMR spectrum of ethyl 2-amino-4-(biphenyl-4-yl)-7,7-dimethyl-5-oxo-1,4,5,6,7,8-hexahydroquinoline-3-carboxylate (7d).....     | 71 |
| Fig. S104. The <sup>13</sup> C NMR spectrum of ethyl 2-amino-4-(biphenyl-4-yl)-7,7-dimethyl-5-oxo-1,4,5,6,7,8-hexahydroquinoline-3-carboxylate (7d).....    | 72 |

|                                                                                                                                                                      |    |
|----------------------------------------------------------------------------------------------------------------------------------------------------------------------|----|
| Fig. S105. The Mass spectrum of ethyl 2-amino-4-(biphenyl-4-yl)-7,7-dimethyl-5-oxo-1,4,5,6,7,8-hexahydroquinoline-3-carboxylate (7d).....                            | 72 |
| Fig. S106. The IR spectrum of diethyl 4,4'-(1,4-phenylene)bis(2-amino-7,7-dimethyl-5-oxo-1,4,5,6,7,8-hexahydroquinoline-3-carboxylate) (7e).....                     | 73 |
| Fig. S107. The <sup>1</sup> H NMR spectrum of diethyl 4,4'-(1,4-phenylene)bis(2-amino-7,7-dimethyl-5-oxo-1,4,5,6,7,8-hexahydroquinoline-3-carboxylate) (7e).....     | 73 |
| Fig. S108. The <sup>1</sup> H NMR spectrum of diethyl 4,4'-(1,4-phenylene)bis(2-amino-7,7-dimethyl-5-oxo-1,4,5,6,7,8-hexahydroquinoline-3-carboxylate) (7e).....     | 74 |
| Fig. S109. The <sup>13</sup> C NMR spectrum of diethyl 4,4'-(1,4-phenylene)bis(2-amino-7,7-dimethyl-5-oxo-1,4,5,6,7,8-hexahydroquinoline-3-carboxylate) (7e).....    | 75 |
| Fig. S110. The Mass spectrum of diethyl 4,4'-(1,4-phenylene)bis(2-amino-7,7-dimethyl-5-oxo-1,4,5,6,7,8-hexahydroquinoline-3-carboxylate) (7e).....                   | 75 |
| Fig. S111. The IR spectrum of ethyl 2-amino-4-(2,5-dimethoxyphenyl)-7,7-dimethyl-5-oxo-1,4,5,6,7,8-hexahydroquinoline-3-carboxylate (7f).....                        | 76 |
| Fig. S112. The <sup>1</sup> H NMR spectrum of ethyl 2-amino-4-(2,5-dimethoxyphenyl)-7,7-dimethyl-5-oxo-1,4,5,6,7,8-hexahydroquinoline-3-carboxylate (7f).....        | 76 |
| Fig. S113. The <sup>1</sup> H NMR spectrum of ethyl 2-amino-4-(2,5-dimethoxyphenyl)-7,7-dimethyl-5-oxo-1,4,5,6,7,8-hexahydroquinoline-3-carboxylate (7f).....        | 77 |
| Fig. S114. The <sup>13</sup> C NMR spectrum of ethyl 2-amino-4-(2,5-dimethoxyphenyl)-7,7-dimethyl-5-oxo-1,4,5,6,7,8-hexahydroquinoline-3-carboxylate (7f).....       | 78 |
| Fig. S115. The <sup>13</sup> C NMR spectrum of ethyl 2-amino-4-(2,5-dimethoxyphenyl)-7,7-dimethyl-5-oxo-1,4,5,6,7,8-hexahydroquinoline-3-carboxylate (7f).....       | 79 |
| Fig. S116. The Mass spectrum of ethyl 2-amino-4-(2,5-dimethoxyphenyl)-7,7-dimethyl-5-oxo-1,4,5,6,7,8-hexahydroquinoline-3-carboxylate (7f).....                      | 79 |
| Fig. S117. The IR spectrum of ethyl 2-amino-7,7-dimethyl-5-oxo-4-(1-phenylprop-1-en-2-yl)-1,4,5,6,7,8-hexahydroquinoline-3-carboxylate (7g).....                     | 80 |
| Fig. S118. The <sup>1</sup> H NMR spectrum of ethyl 2-amino-7,7-dimethyl-5-oxo-4-(1-phenylprop-1-en-2-yl)-1,4,5,6,7,8-hexahydroquinoline-3-carboxylate (7g).....     | 80 |
| Fig. S119. The <sup>1</sup> H NMR spectrum of ethyl 2-amino-7,7-dimethyl-5-oxo-4-(1-phenylprop-1-en-2-yl)-1,4,5,6,7,8-hexahydroquinoline-3-carboxylate (7g).....     | 81 |
| Fig. S120. The <sup>13</sup> C NMR spectrum of ethyl 2-amino-7,7-dimethyl-5-oxo-4-(1-phenylprop-1-en-2-yl)-1,4,5,6,7,8-hexahydroquinoline-3-carboxylate (7g).....    | 82 |
| Fig. S121. The Mass spectrum of ethyl 2-amino-7,7-dimethyl-5-oxo-4-(1-phenylprop-1-en-2-yl)-1,4,5,6,7,8-hexahydroquinoline-3-carboxylate (7g).....                   | 82 |
| Fig. S122. The IR spectrum of ethyl 2-amino-4-(4-hydroxy-3-methoxyphenyl)-7,7-dimethyl-5-oxo-1,4,5,6,7,8-hexahydroquinoline-3-carboxylate (7h).....                  | 83 |
| Fig. S123. The <sup>1</sup> H NMR spectrum of ethyl 2-amino-4-(4-hydroxy-3-methoxyphenyl)-7,7-dimethyl-5-oxo-1,4,5,6,7,8-hexahydroquinoline-3-carboxylate (7h).....  | 83 |
| Fig. S124. The <sup>1</sup> H NMR spectrum of ethyl 2-amino-4-(4-hydroxy-3-methoxyphenyl)-7,7-dimethyl-5-oxo-1,4,5,6,7,8-hexahydroquinoline-3-carboxylate (7h).....  | 84 |
| Fig. S125. The <sup>13</sup> C NMR spectrum of ethyl 2-amino-4-(4-hydroxy-3-methoxyphenyl)-7,7-dimethyl-5-oxo-1,4,5,6,7,8-hexahydroquinoline-3-carboxylate (7h)..... | 85 |
| Fig. S126. The <sup>13</sup> C NMR spectrum of ethyl 2-amino-4-(4-hydroxy-3-methoxyphenyl)-7,7-dimethyl-5-oxo-1,4,5,6,7,8-hexahydroquinoline-3-carboxylate (7h)..... | 86 |
| Fig. S127. The Mass spectrum of ethyl 2-amino-4-(4-hydroxy-3-methoxyphenyl)-7,7-dimethyl-5-oxo-1,4,5,6,7,8-hexahydroquinoline-3-carboxylate (7h).....                | 86 |

**Supplementary data:**

**Fig. S1.** The Mass spectrum of 1-methylimidazolium trinitromethanide as a nano ionic liquid catalyst

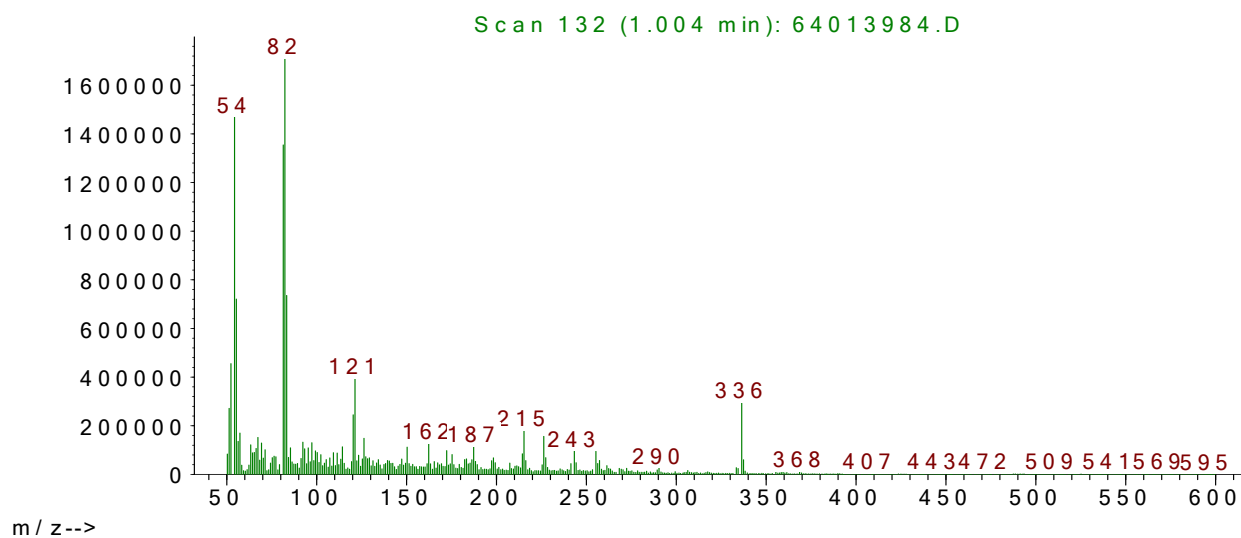

**Fig. S2.** The Mass spectrum of 1-methylimidazolium trinitromethanide as a nano ionic liquid catalyst

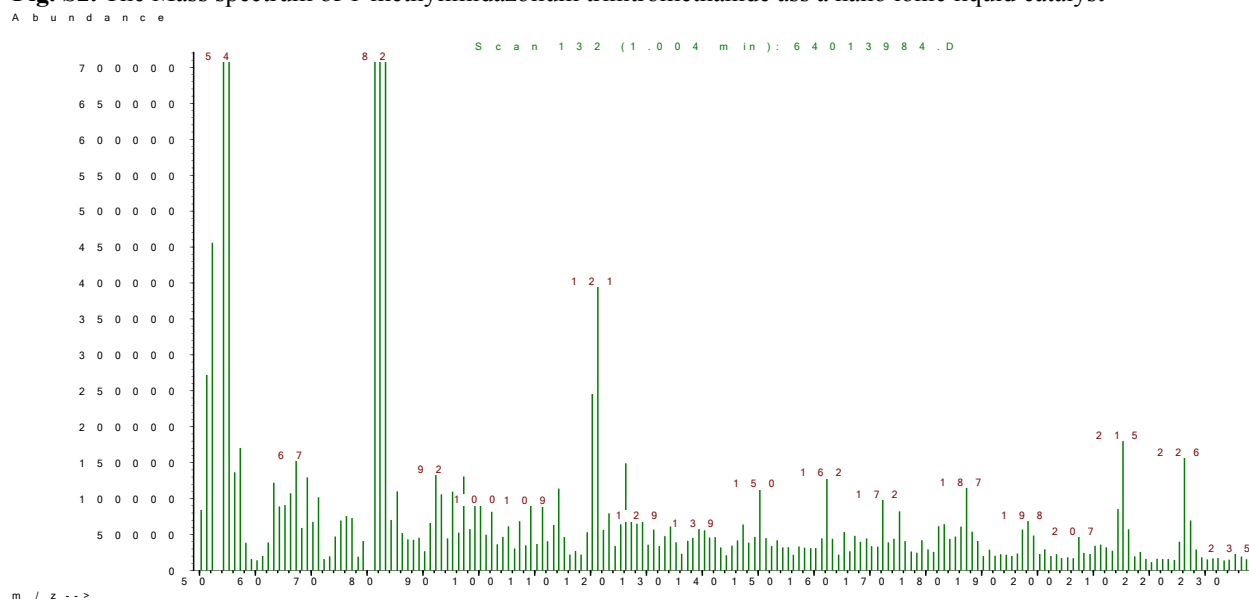

**Fig. S3.** Scanning electron microscopy (SEM) of the nano ionic liquid catalyst

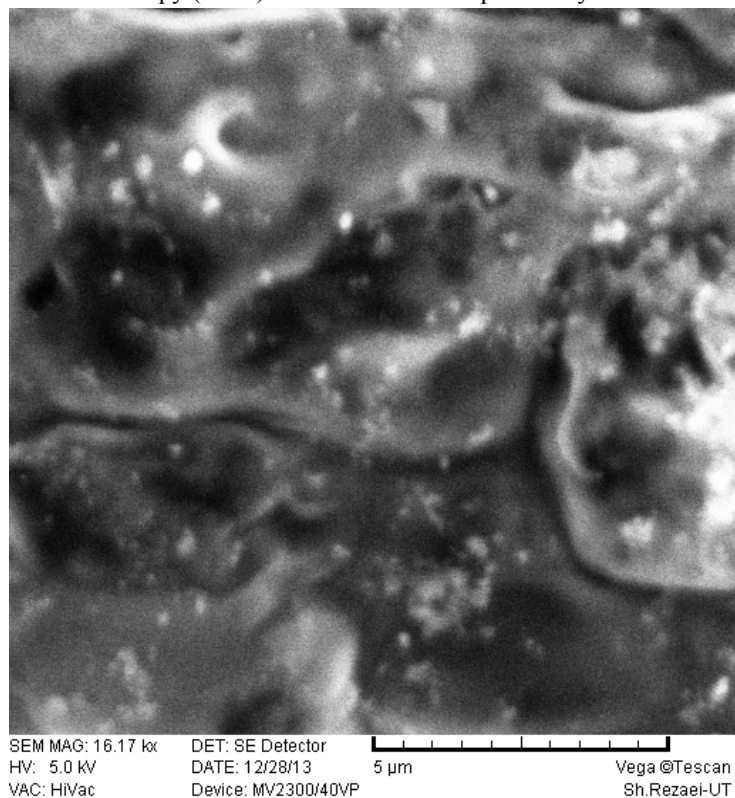

**Fig. S4.** The  $^1\text{H}$  NMR spectrum of 1-methylimidazolium trinitromethanide as a nano ionic liquid catalyst after recycling

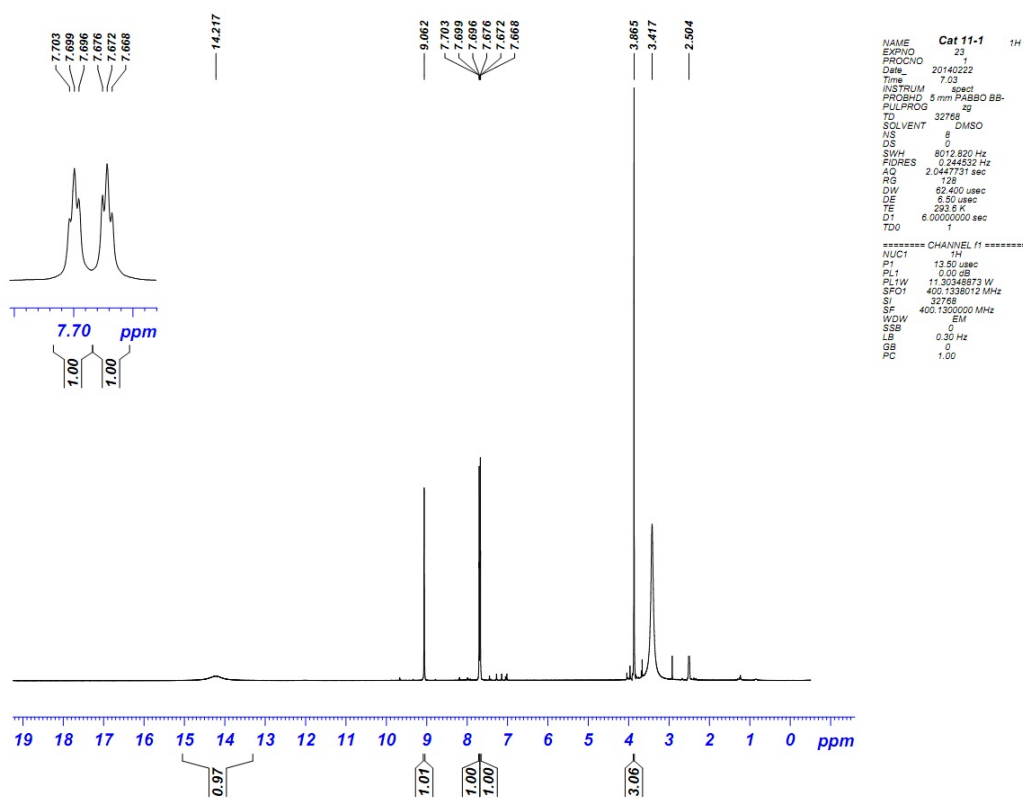



**Fig. S.5.** The  $^{13}\text{C}$  NMR spectrum of 1-methylimidazolium trinitromethanide as a nano ionic liquid catalyst after recycling

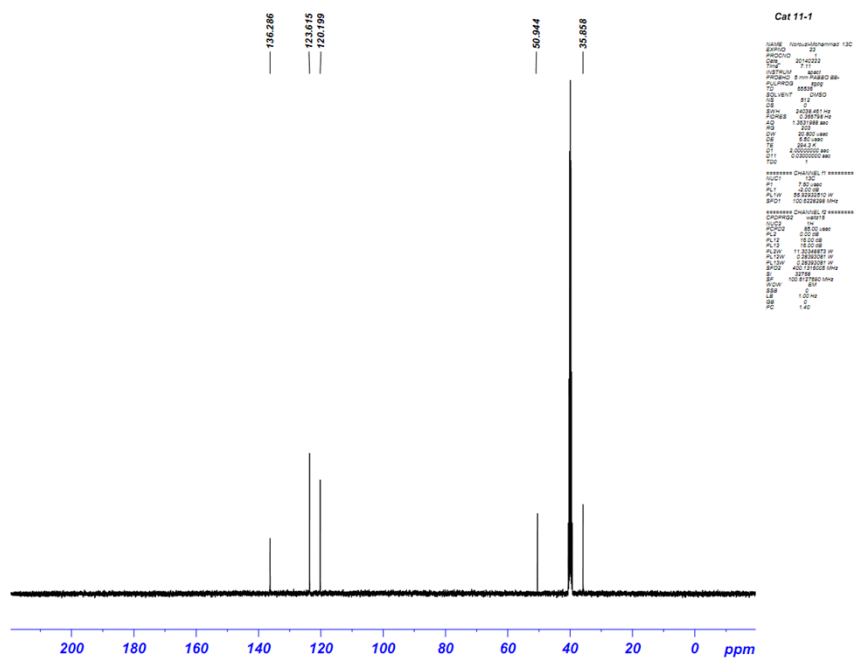

**Fig. S.6.** The Transmission electron microscopy (TEM) of 1-methylimidazolium trinitromethanide as a nano ionic liquid catalyst after recycling process.

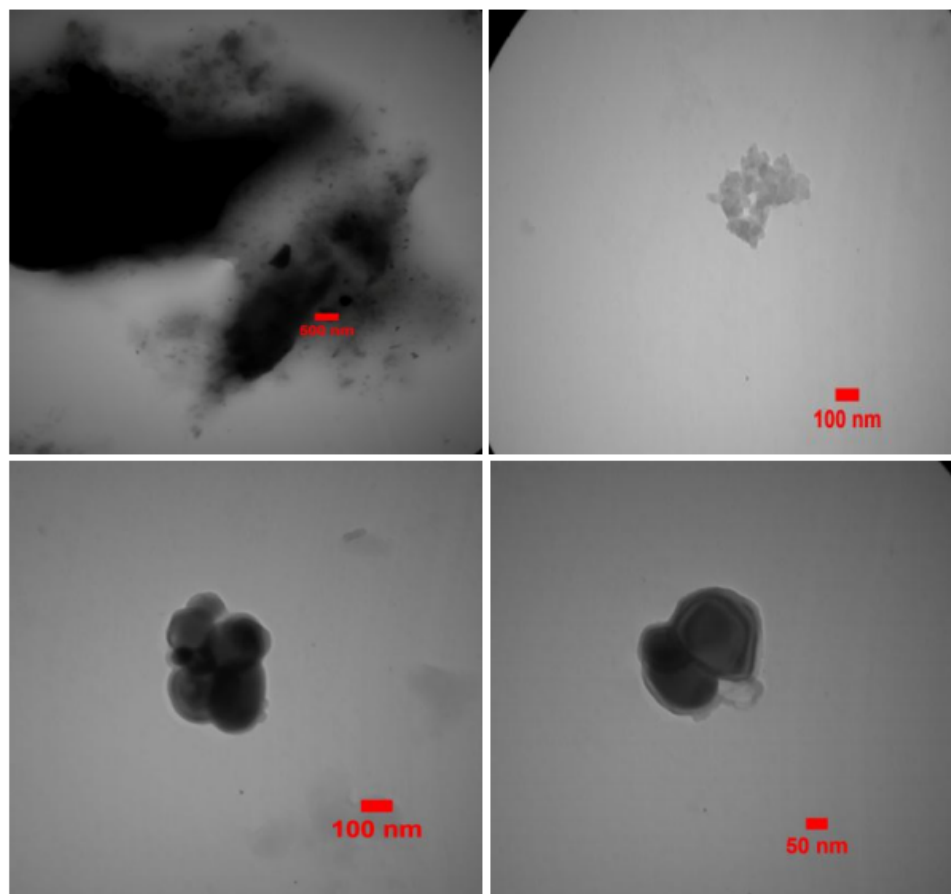

**Fig. S7.** The IR spectrum of methyl 4-(2,5-dimethoxyphenyl)-2-methyl-5-oxo-1,4,5,6,7,8-hexahydroquinoline-3-carboxylate (**5a**)

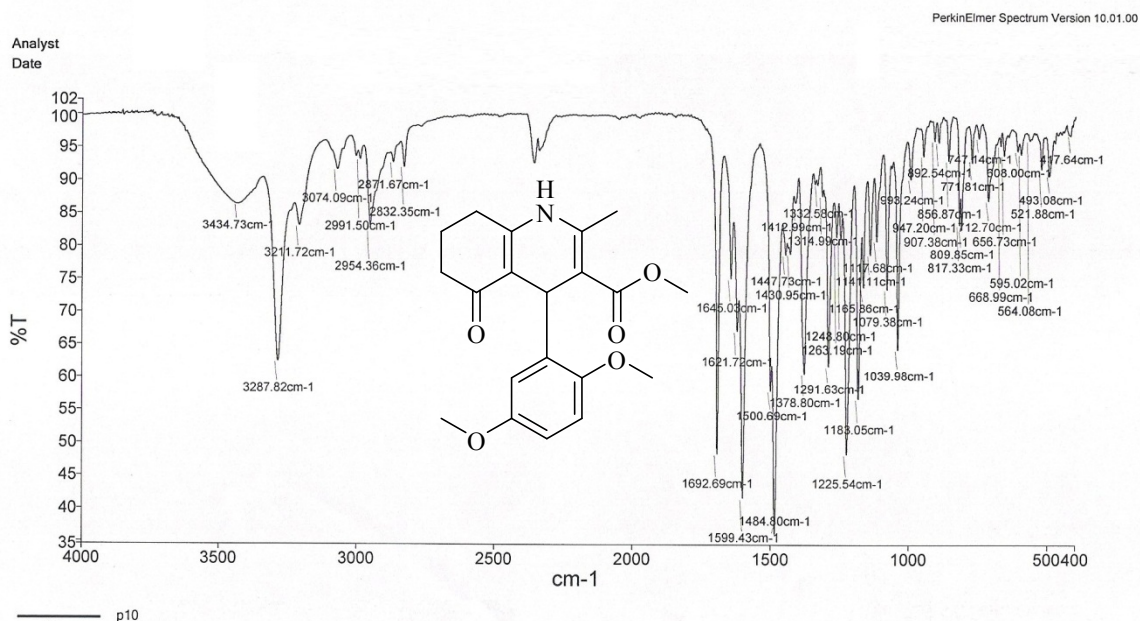

**Fig. S8.** The  $^1\text{H}$  NMR spectrum of methyl 4-(2,5-dimethoxyphenyl)-2-methyl-5-oxo-1,4,5,6,7,8-hexahydroquinoline-3-carboxylate (**5a**)

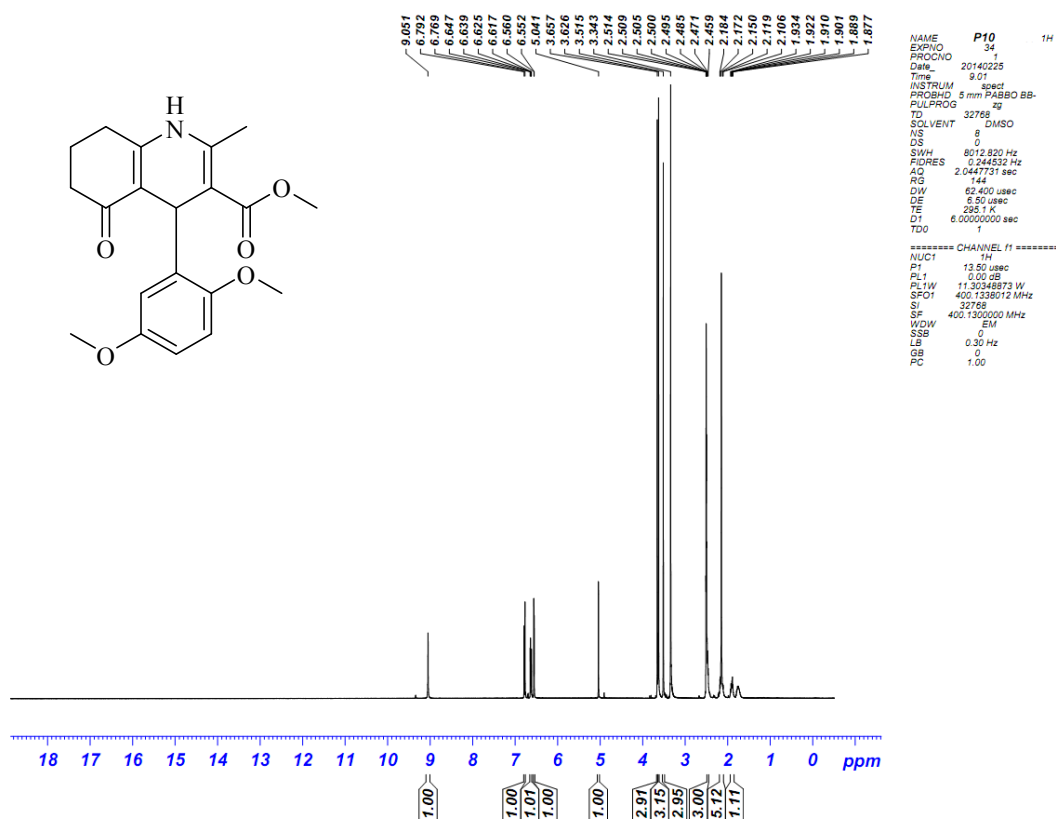

**Fig. S9.** The  $^1\text{H}$  NMR spectrum of methyl 4-(2,5-dimethoxyphenyl)-2-methyl-5-oxo-1,4,5,6,7,8-hexahydroquinoline-3-carboxylate (**5a**)

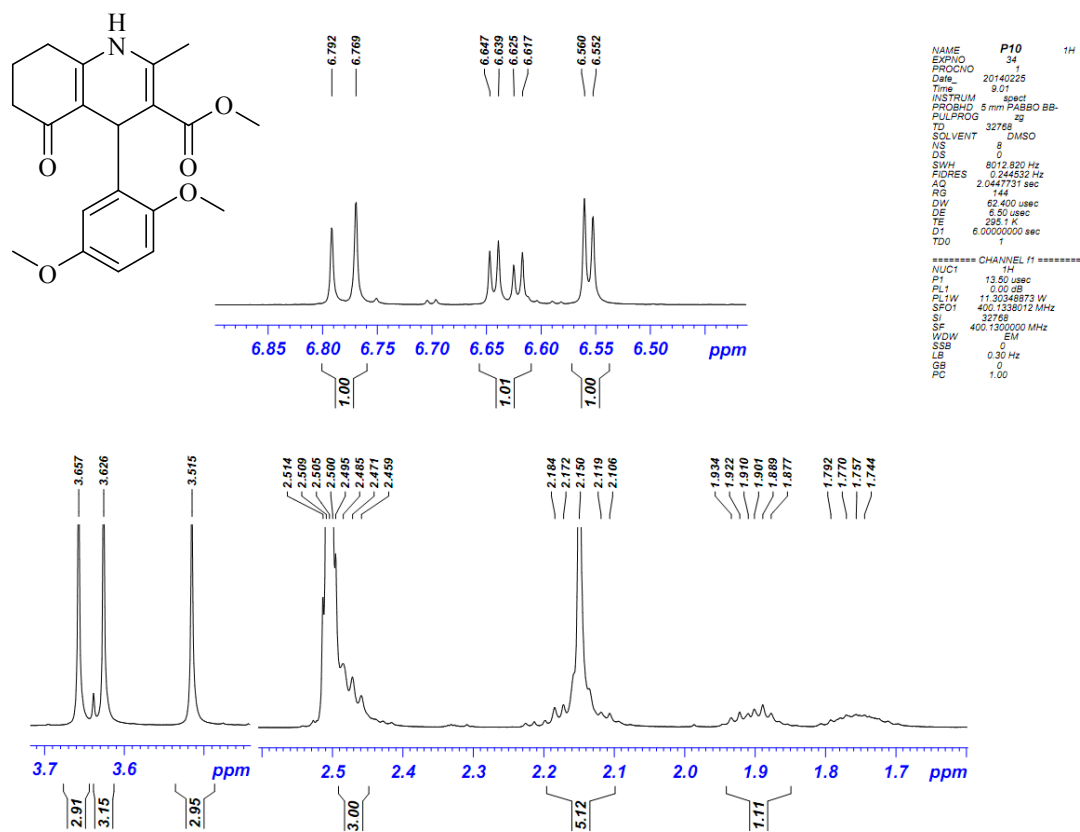

**Fig. S10.** The  $^{13}\text{C}$  NMR spectrum of methyl 4-(2,5-dimethoxyphenyl)-2-methyl-5-oxo-1,4,5,6,7,8-hexahydroquinoline-3-carboxylate (**5a**)

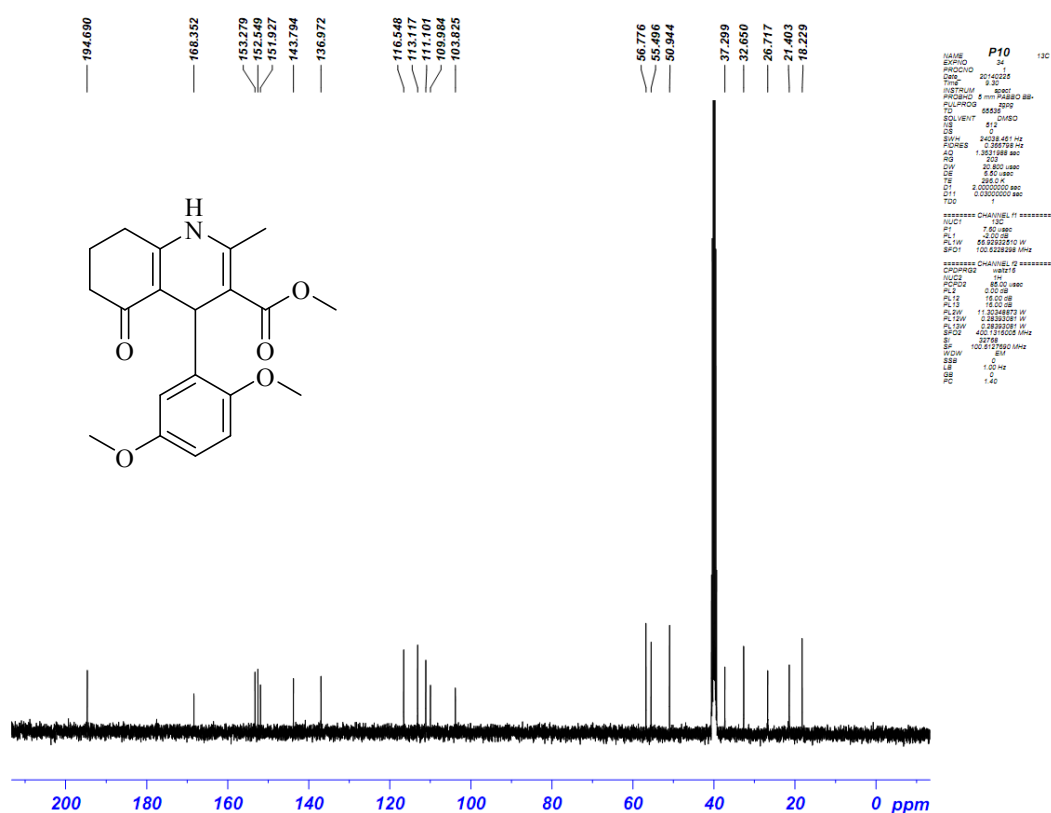

**Fig. S11.** The Mass spectrum of methyl 4-(2,5-dimethoxyphenyl)-2-methyl-5-oxo-1,4,5,6,7,8-hexahydroquinoline-3-carboxylate (**5a**)

Abundance

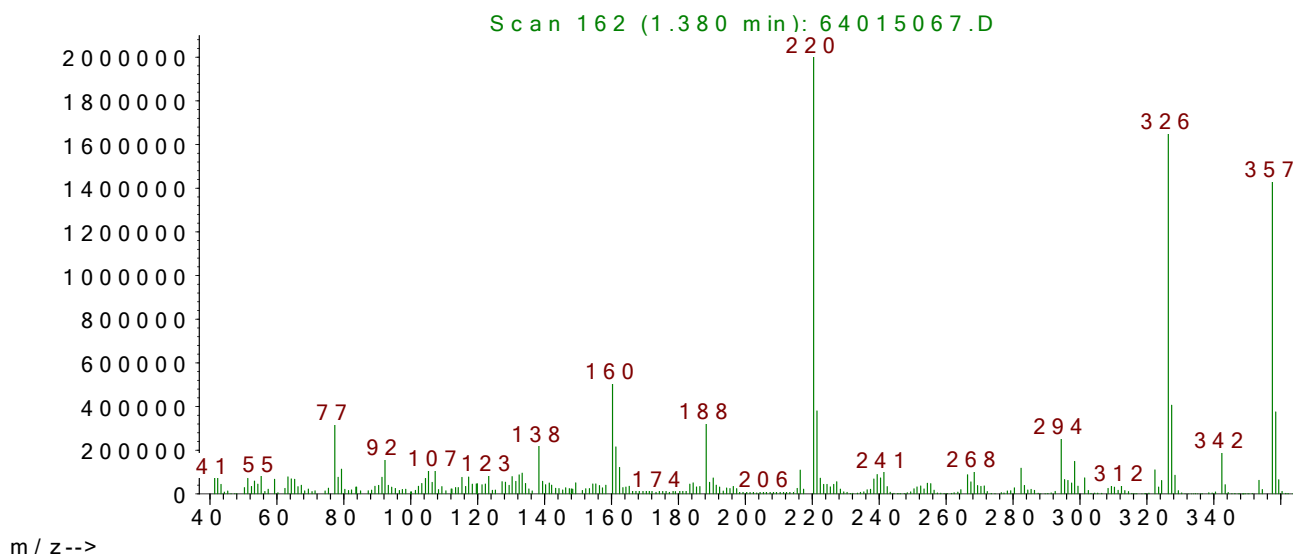

**Fig. S12.** The IR spectrum of methyl 4-(4-hydroxy-3-methoxyphenyl)-2-methyl-5-oxo-1,4,5,6,7,8-hexahydroquinoline-3-carboxylate (**5b**)

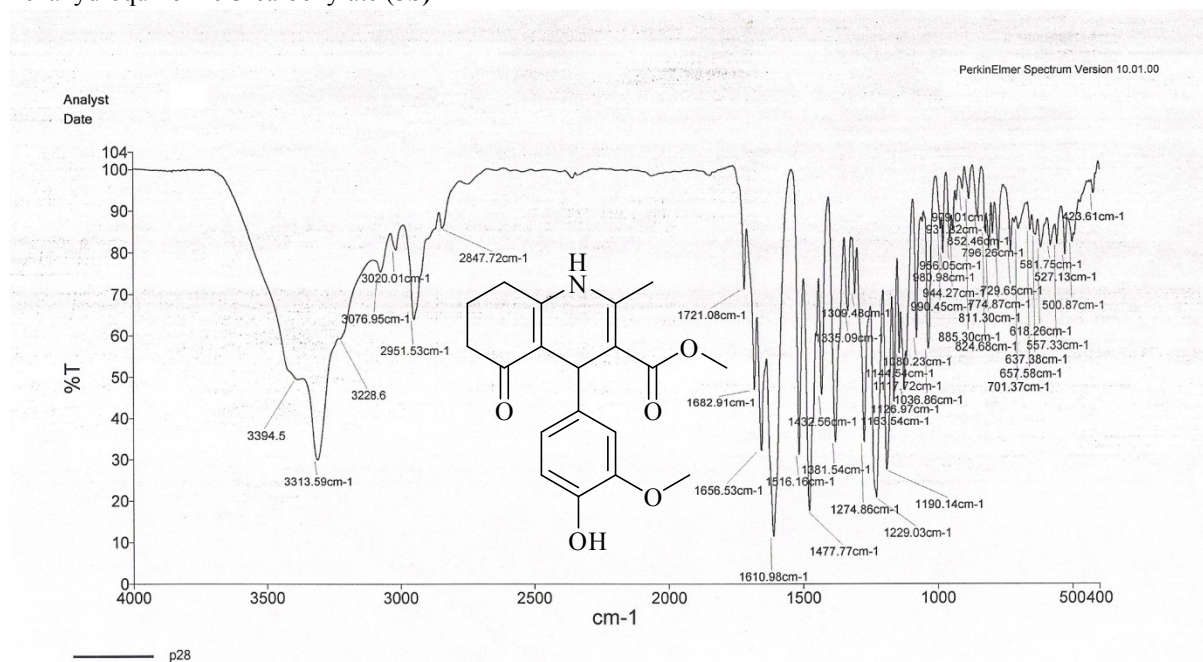

**Fig. S13.** The <sup>1</sup>H NMR spectrum of methyl 4-(4-hydroxy-3-methoxyphenyl)-2-methyl-5-oxo-1,4,5,6,7,8-hexahydroquinoline-3-carboxylate (**5b**)

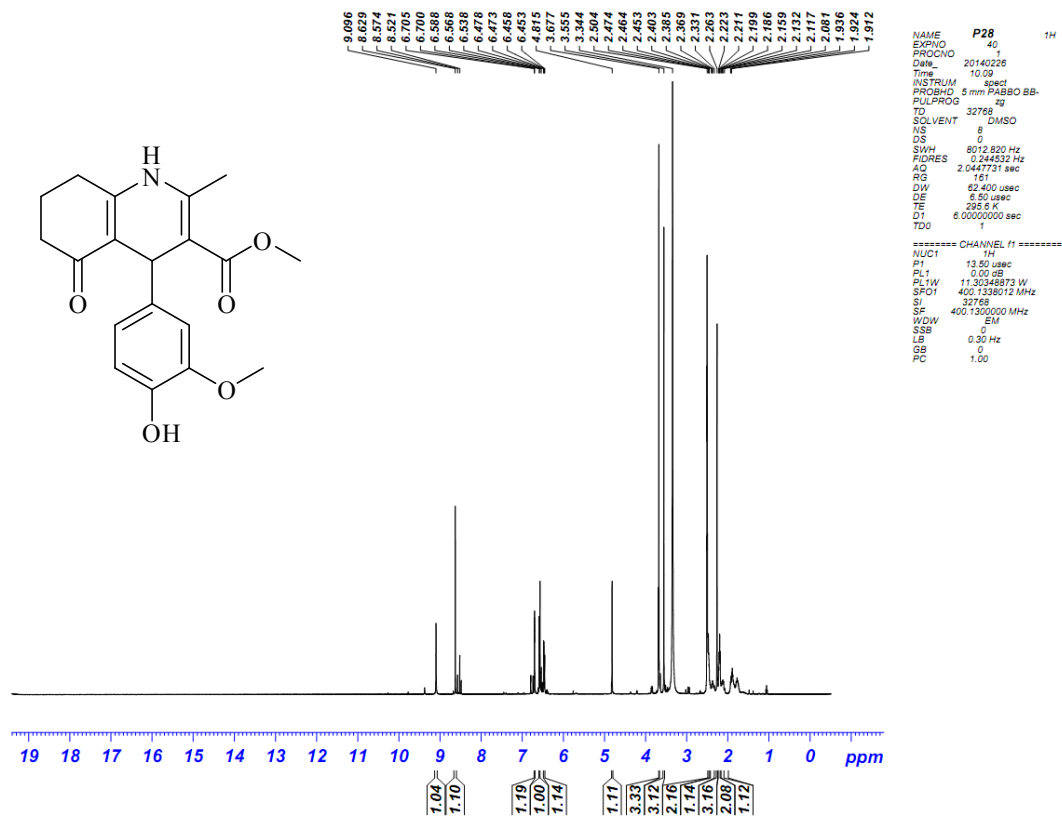

**Fig. S14.** The  $^1\text{H}$  NMR spectrum of methyl 4-(4-hydroxy-3-methoxyphenyl)-2-methyl-5-oxo-1,4,5,6,7,8-hexahydroquinoline-3-carboxylate (**5b**)

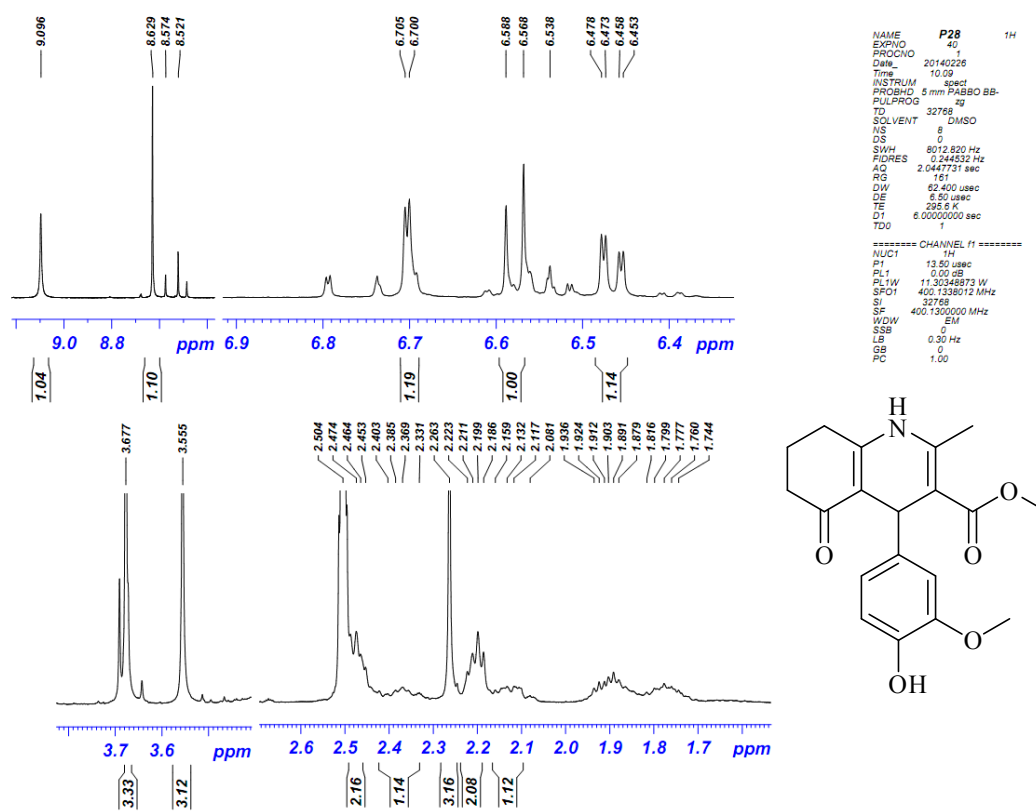

**Fig. S15.** The  $^{13}\text{C}$  NMR spectrum of methyl 4-(4-hydroxy-3-methoxyphenyl)-2-methyl-5-oxo-1,4,5,6,7,8-hexahydroquinoline-3-carboxylate (**5b**)

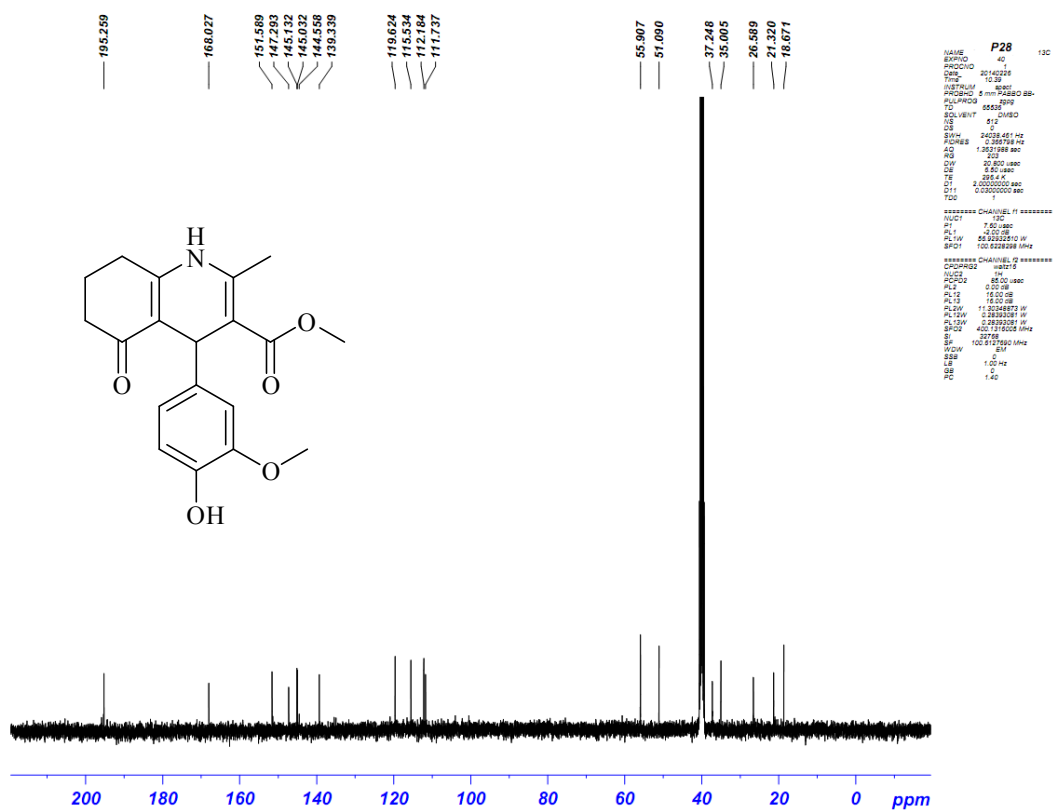

**Fig. S16.** The  $^{13}\text{C}$  NMR spectrum of methyl 4-(4-hydroxy-3-methoxyphenyl)-2-methyl-5-oxo-1,4,5,6,7,8-hexahydroquinoline-3-carboxylate (**5b**)

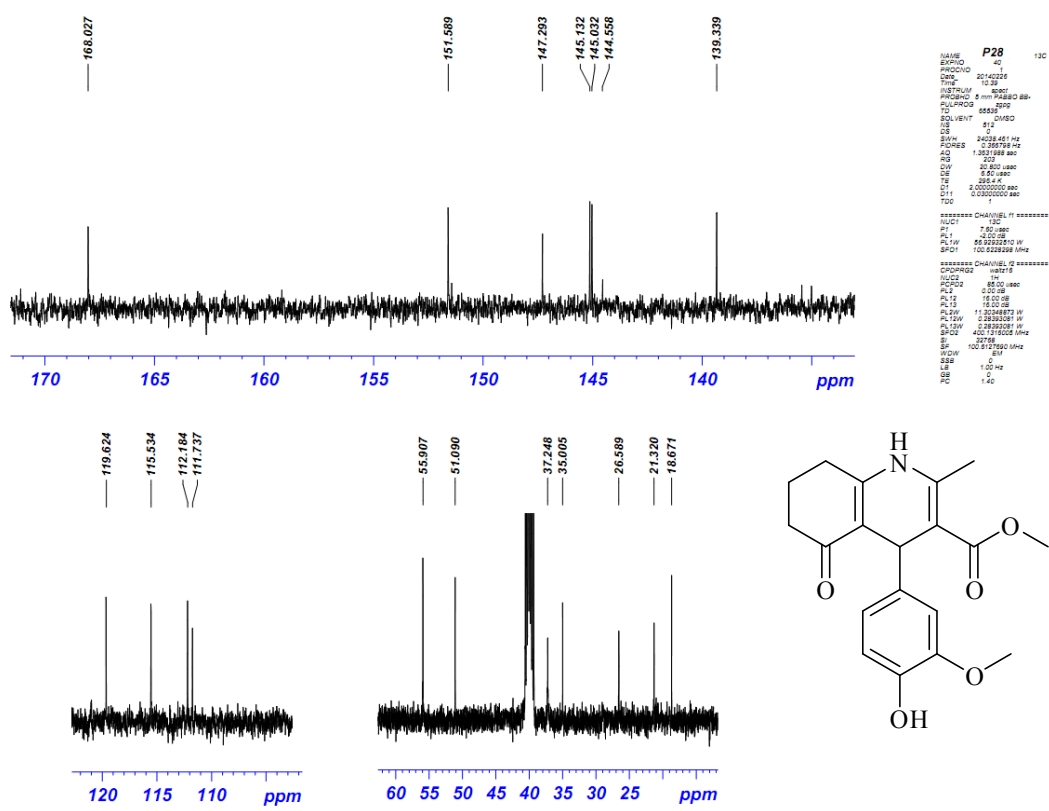

**Fig. S17.** The Mass spectrum of 1 methyl 4-(4-hydroxy-3-methoxyphenyl)-2-methyl-5-oxo-1,4,5,6,7,8-hexahydroquinoline-3-carboxylate (**5b**)

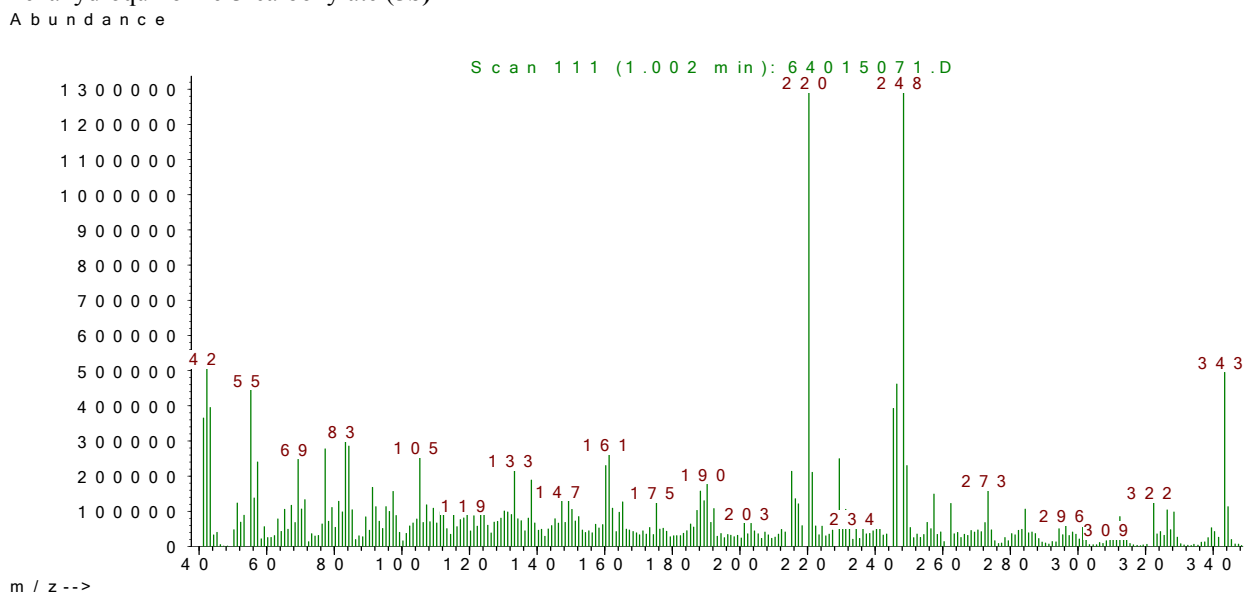



**Fig. S18.** The IR spectrum of methyl 4-(4-(dimethylamino)phenyl)-2-methyl-5-oxo-1,4,5,6,7,8-hexahydroquinoline-3-carboxylate (**5c**)

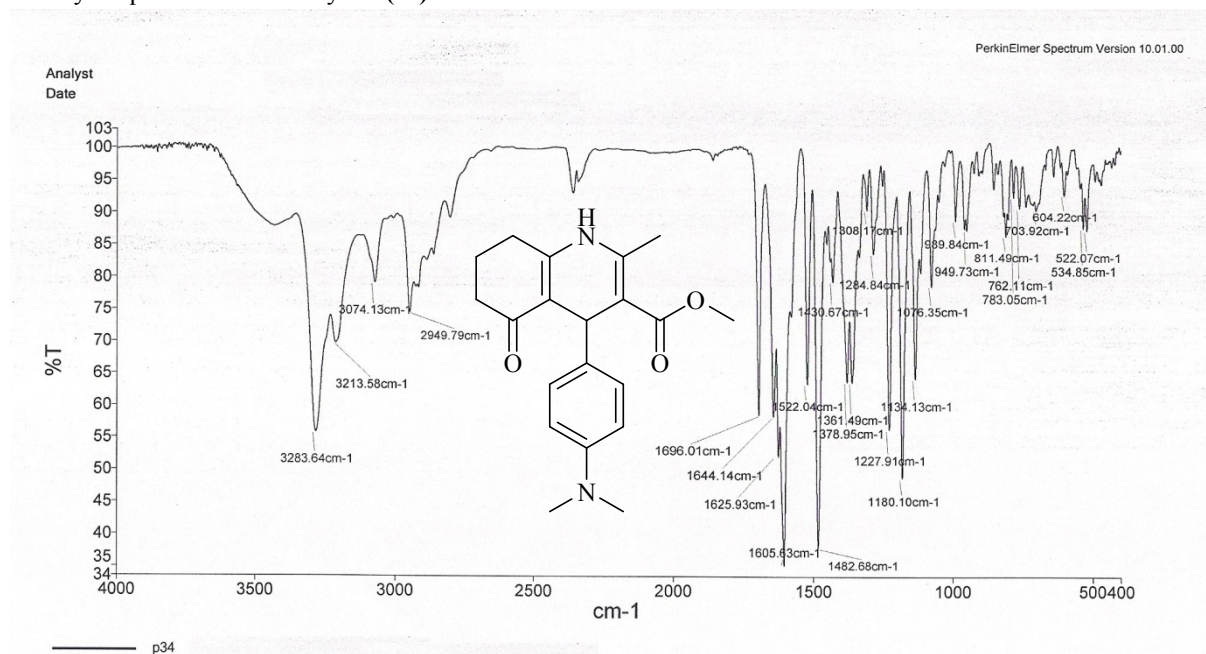

**Fig. S19.** The <sup>1</sup>H NMR spectrum of methyl 4-(4-(dimethylamino)phenyl)-2-methyl-5-oxo-1,4,5,6,7,8-hexahydroquinoline-3-carboxylate (**5c**)

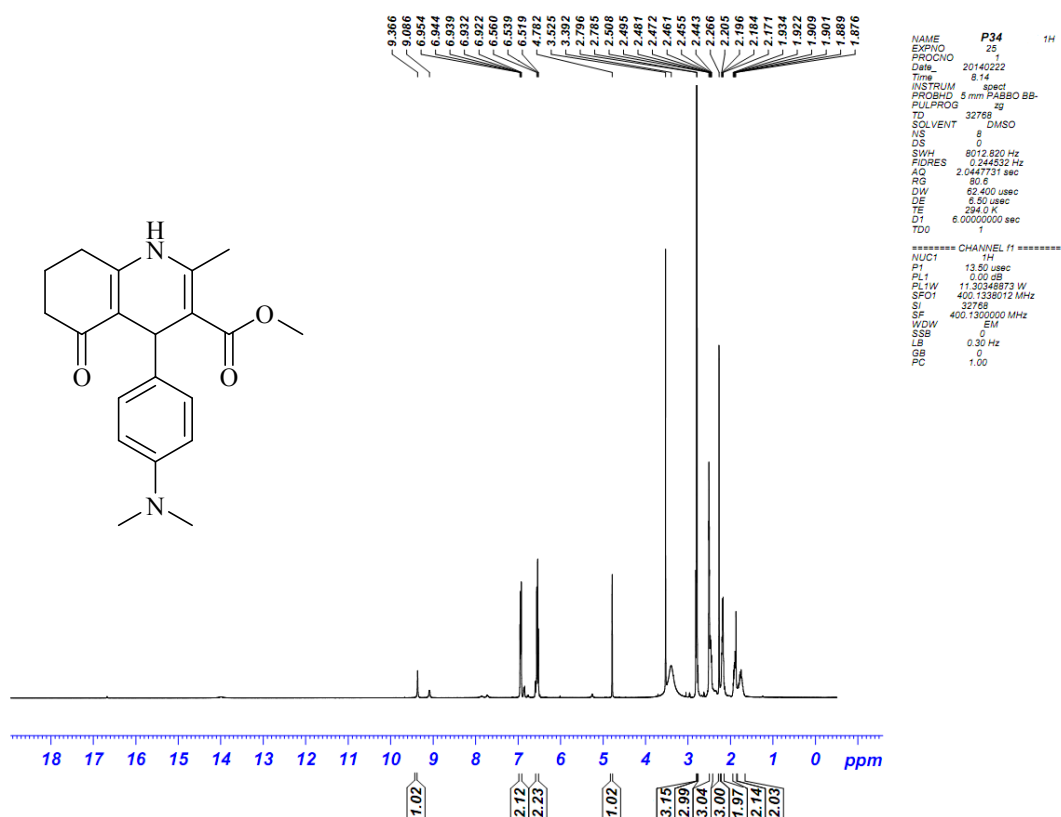

**Fig. S20.** The  $^1\text{H}$  NMR spectrum of methyl 4-(4-(dimethylamino)phenyl)-2-methyl-5-oxo-1,4,5,6,7,8-hexahydroquinoline-3-carboxylate (**5c**)

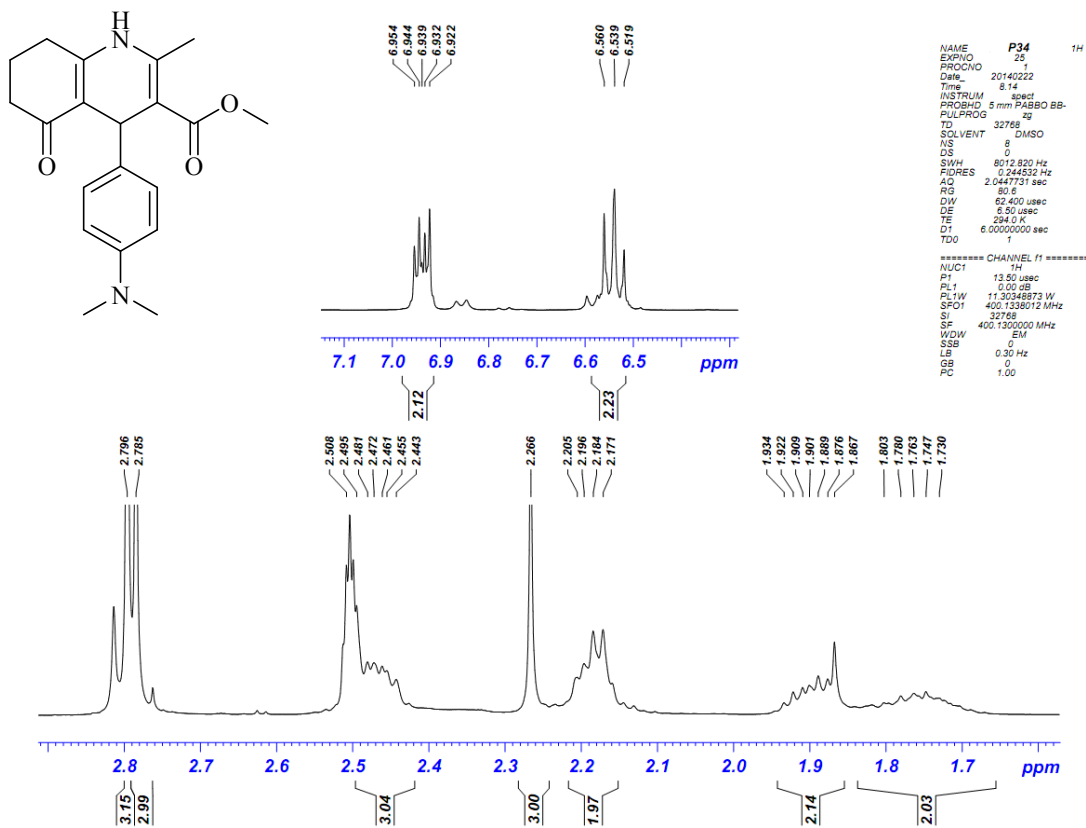

**Fig. S21.** The  $^{13}\text{C}$  NMR spectrum of methyl 4-(4-(dimethylamino)phenyl)-2-methyl-5-oxo-1,4,5,6,7,8-hexahydroquinoline-3-carboxylate (**5c**)

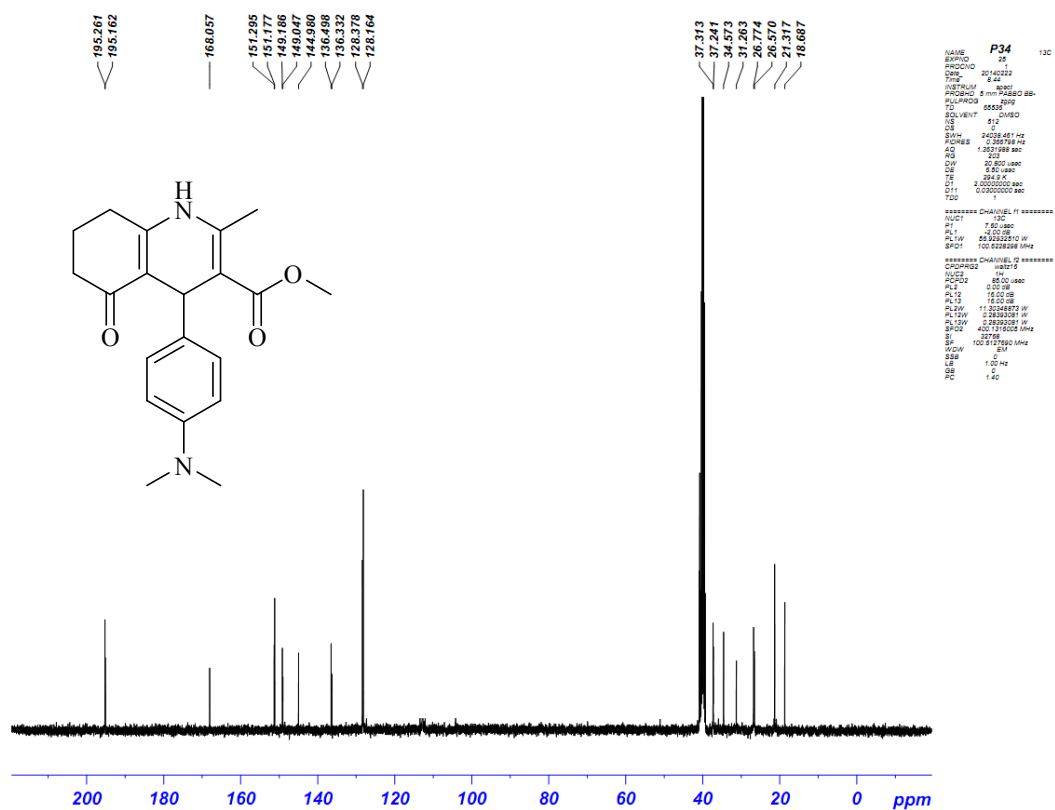

**Fig. S22.** The  $^{13}\text{C}$  NMR spectrum of methyl 4-(4-(dimethylamino)phenyl)-2-methyl-5-oxo-1,4,5,6,7,8-hexahydroquinoline-3-carboxylate (**5c**)

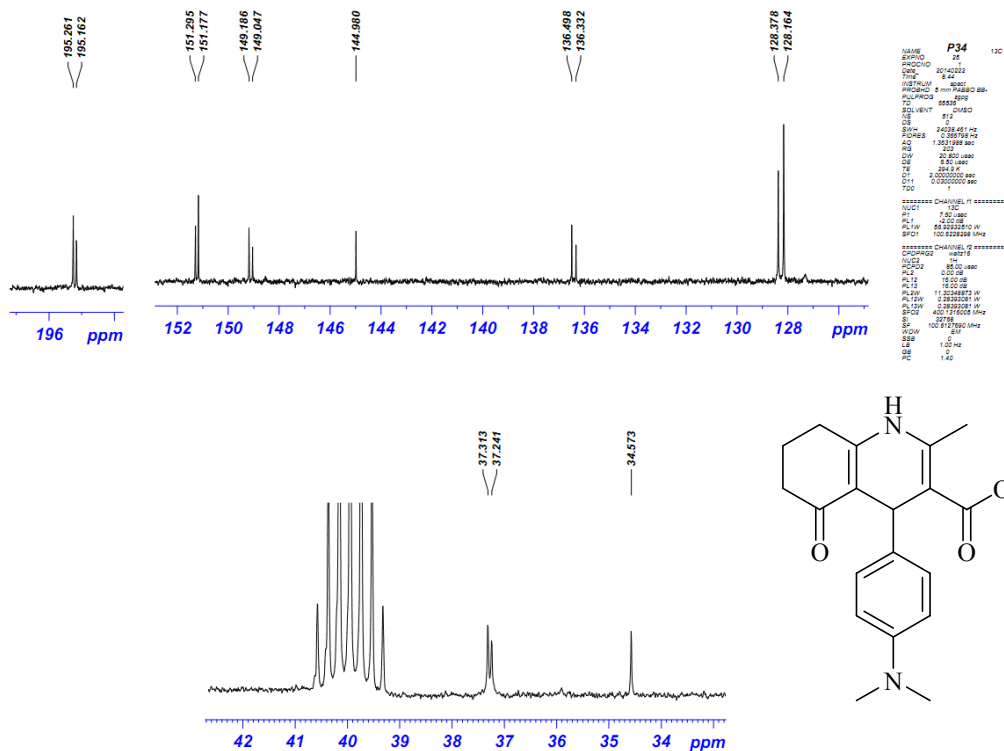

**Fig. S23.** The Mass spectrum of methyl 4-(4-(dimethylamino)phenyl)-2-methyl-5-oxo-1,4,5,6,7,8-hexahydroquinoline-3-carboxylate (**5c**)

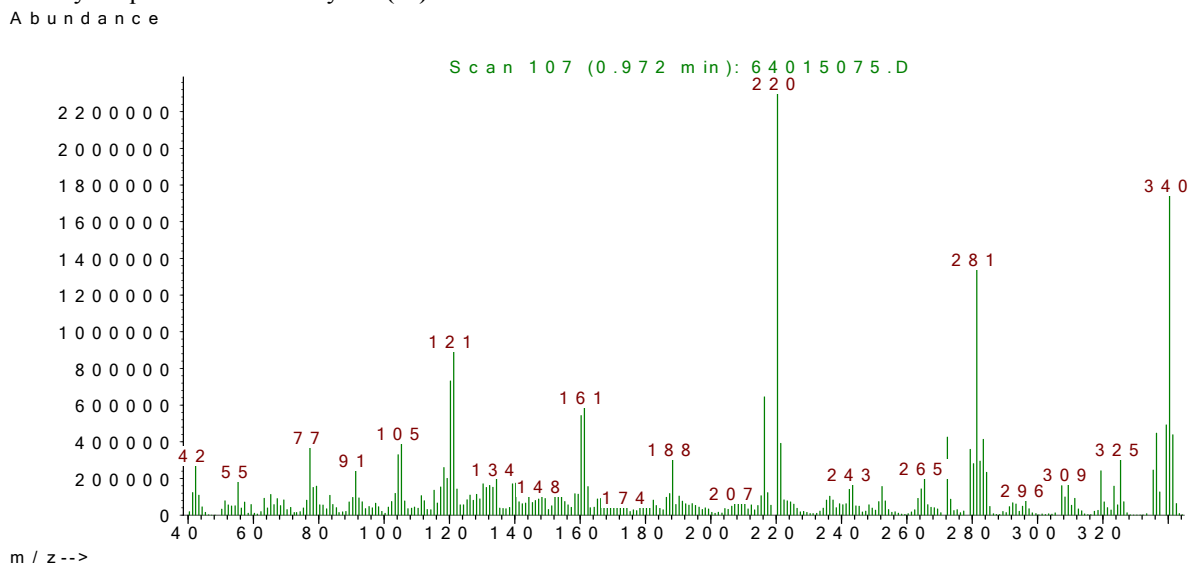

**Fig. S24.** The IR spectrum of methyl 4-(biphenyl-4-yl)-2,7,7-trimethyl-5-oxo-1,4,5,6,7,8-hexahydroquinoline-3-carboxylate (**5d**)

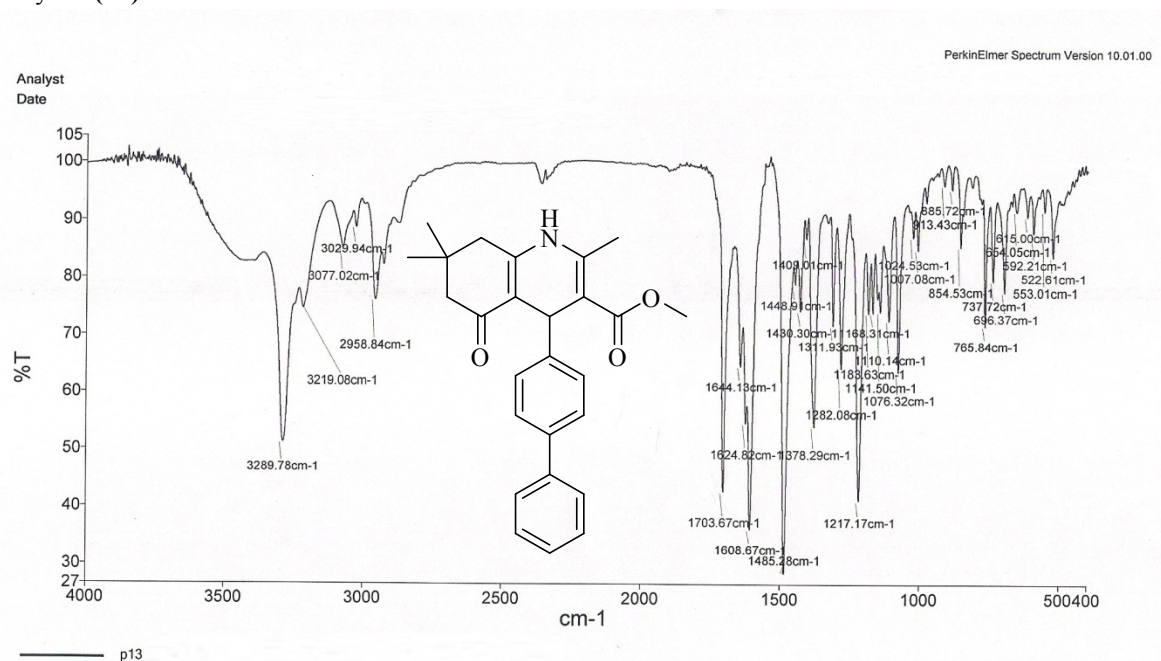

**Fig. S25.** The <sup>1</sup>H NMR spectrum of methyl 4-(biphenyl-4-yl)-2,7,7-trimethyl-5-oxo-1,4,5,6,7,8-hexahydroquinoline-3-carboxylate (**5d**)

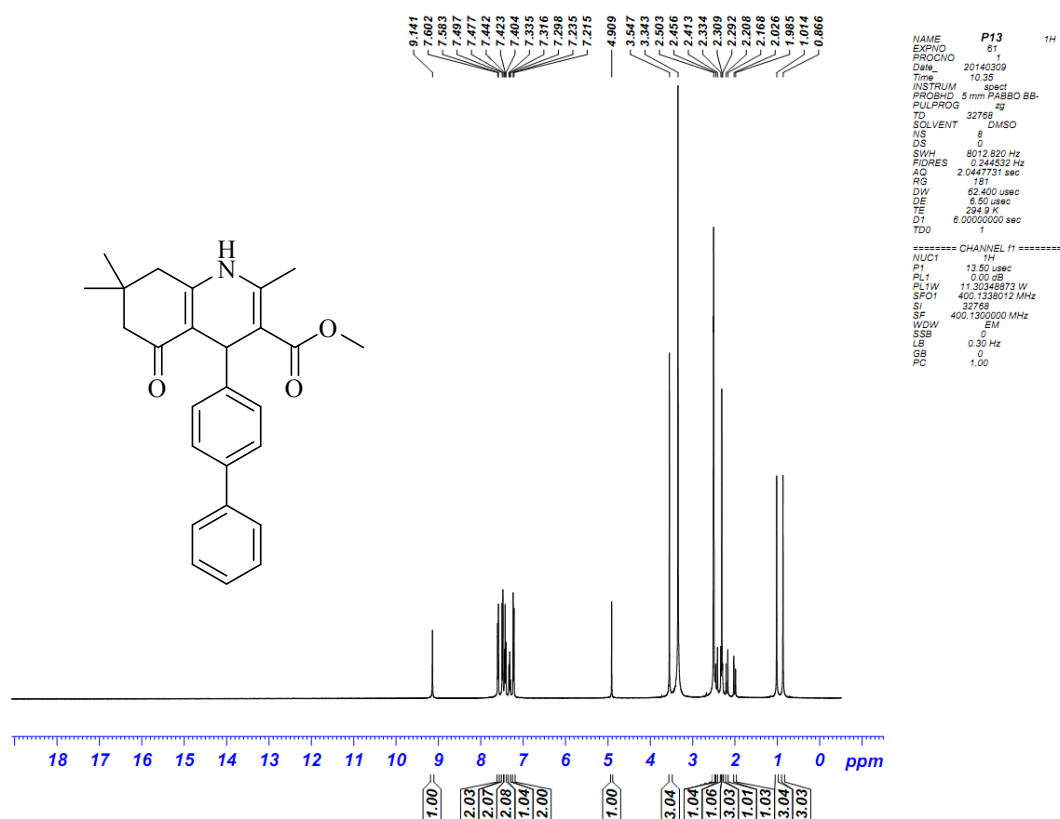

**Fig. S26.** The  $^1\text{H}$  NMR spectrum of methyl 4-(biphenyl-4-yl)-2,7,7-trimethyl-5-oxo-1,4,5,6,7,8-hexahydroquinoline-3-carboxylate (**5d**)

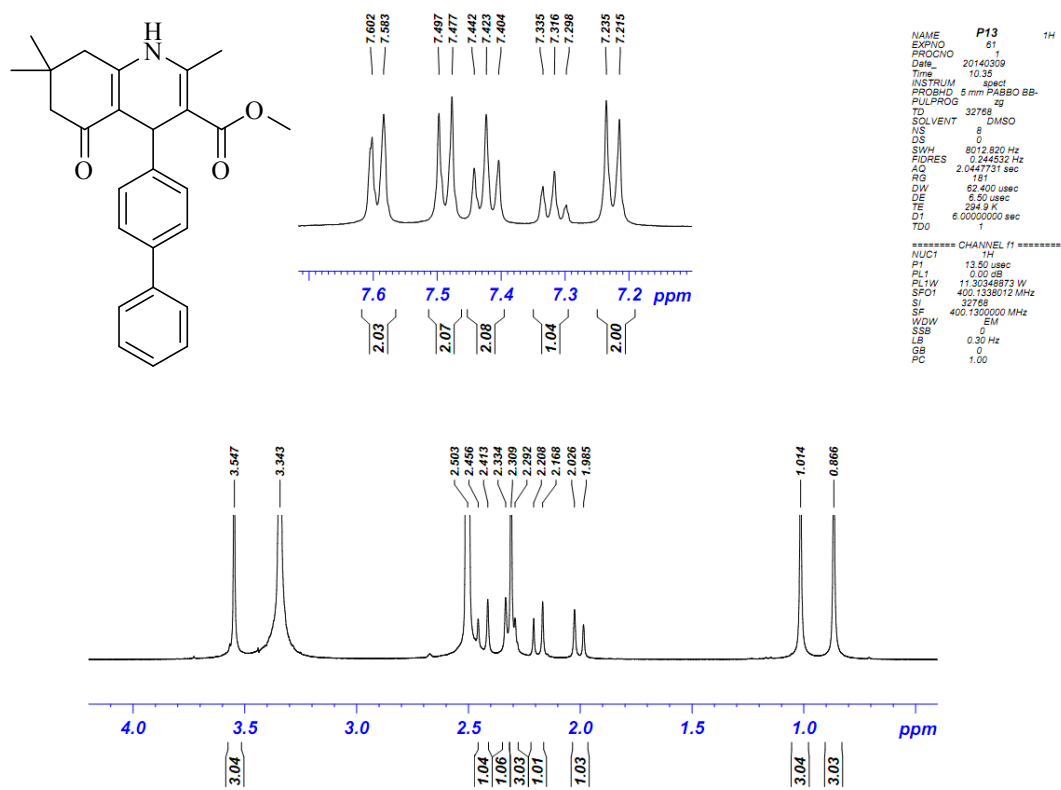

**Fig. S27.** The  $^{13}\text{C}$  NMR spectrum of methyl 4-(biphenyl-4-yl)-2,7,7-trimethyl-5-oxo-1,4,5,6,7,8-hexahydroquinoline-3-carboxylate (**5d**)

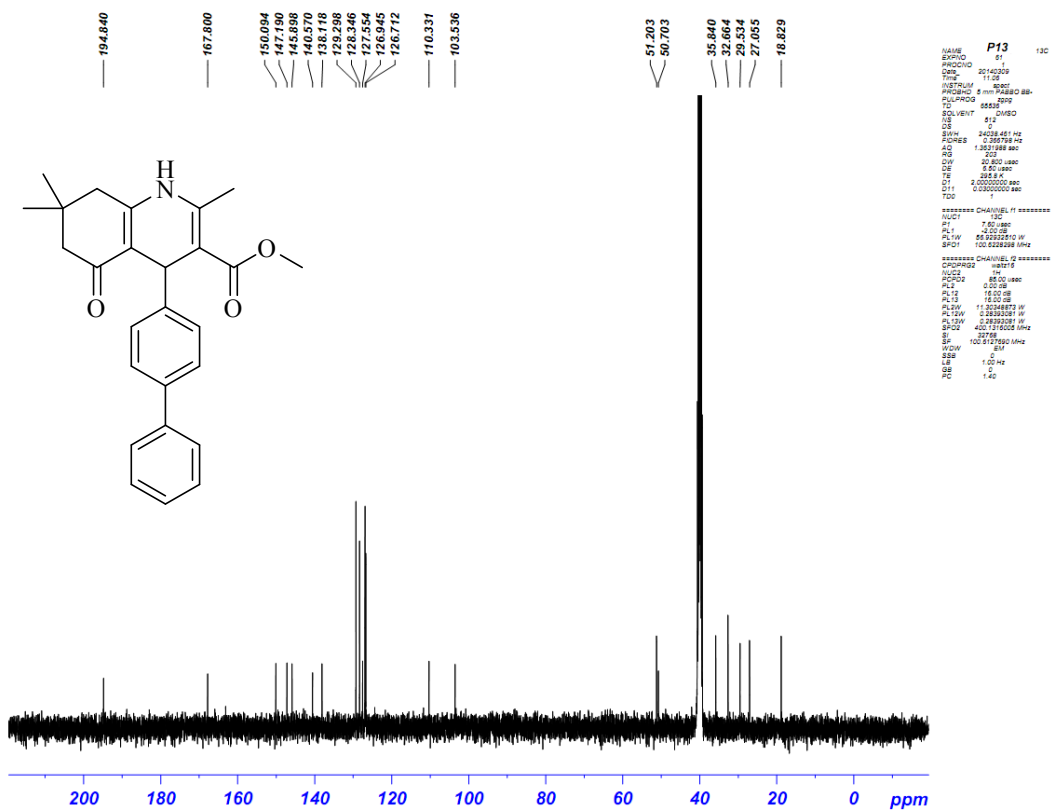

**Fig. S28.** The  $^{13}\text{C}$  NMR spectrum of methyl 4-(biphenyl-4-yl)-2,7,7-trimethyl-5-oxo-1,4,5,6,7,8-hexahydroquinoline-3-carboxylate (**5d**)

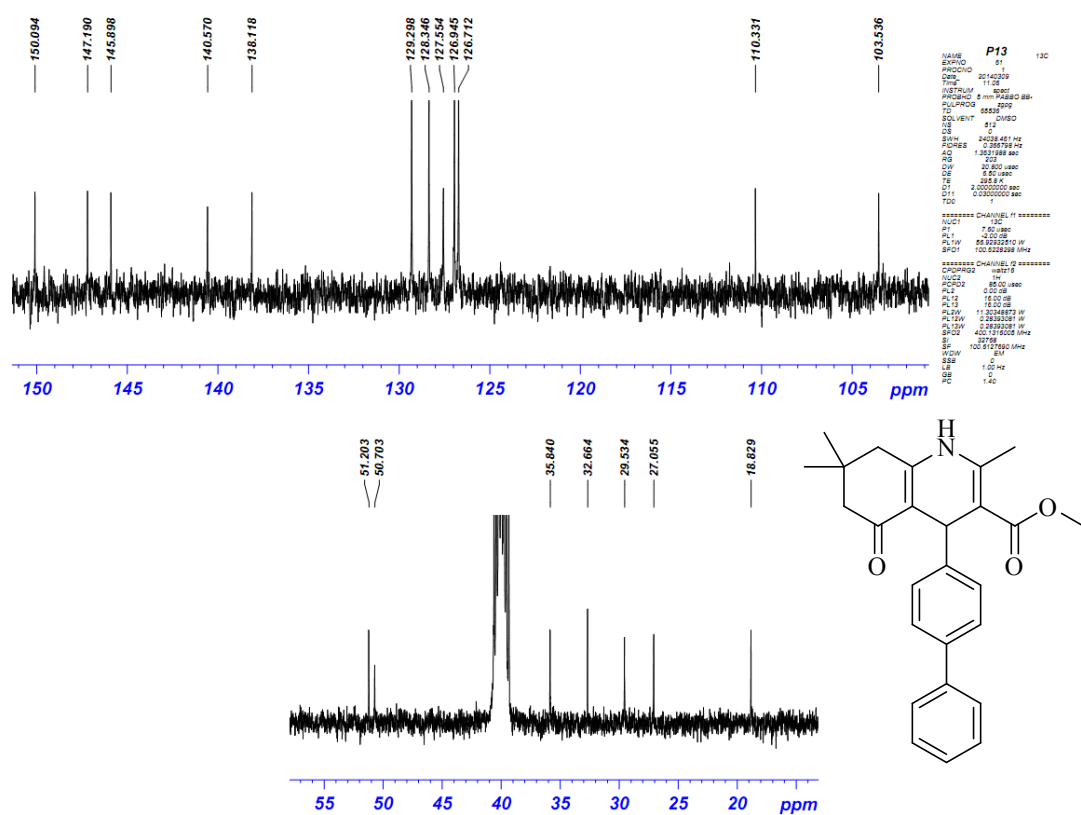

**Fig. S29.** The Mass spectrum of methyl 4-(biphenyl-4-yl)-2,7,7-trimethyl-5-oxo-1,4,5,6,7,8-hexahydroquinoline-3-carboxylate (**5d**)

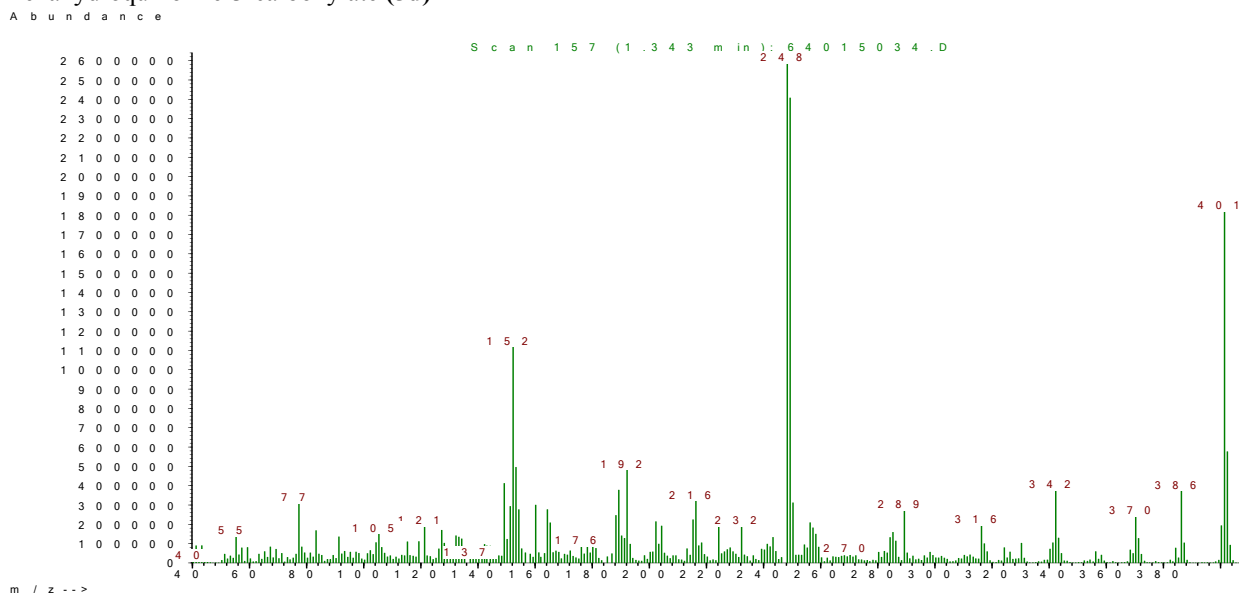



**Fig. S30.** The IR spectrum of dimethyl 4,4'-(1,4-phenylene)bis(2,7,7-trimethyl-5-oxo-1,4,5,6,7,8-hexahydroquinoline-3-carboxylate) (**5e**)

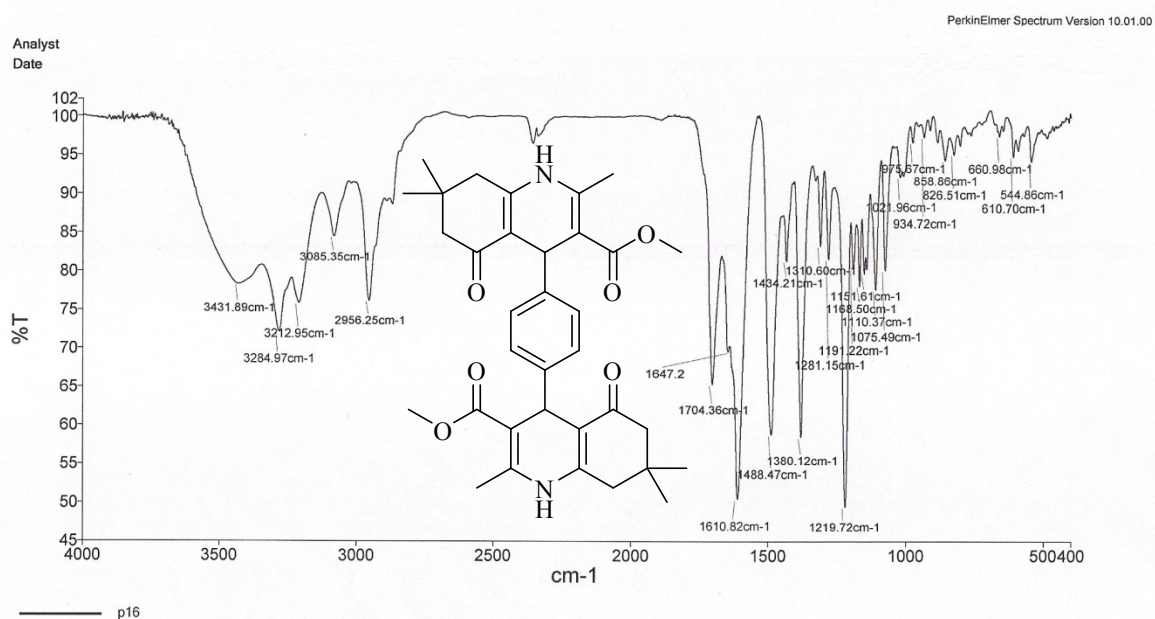

**Fig. S31.** The <sup>1</sup>H NMR spectrum of dimethyl 4,4'-(1,4-phenylene)bis(2,7,7-trimethyl-5-oxo-1,4,5,6,7,8-hexahydroquinoline-3-carboxylate) (**5e**)

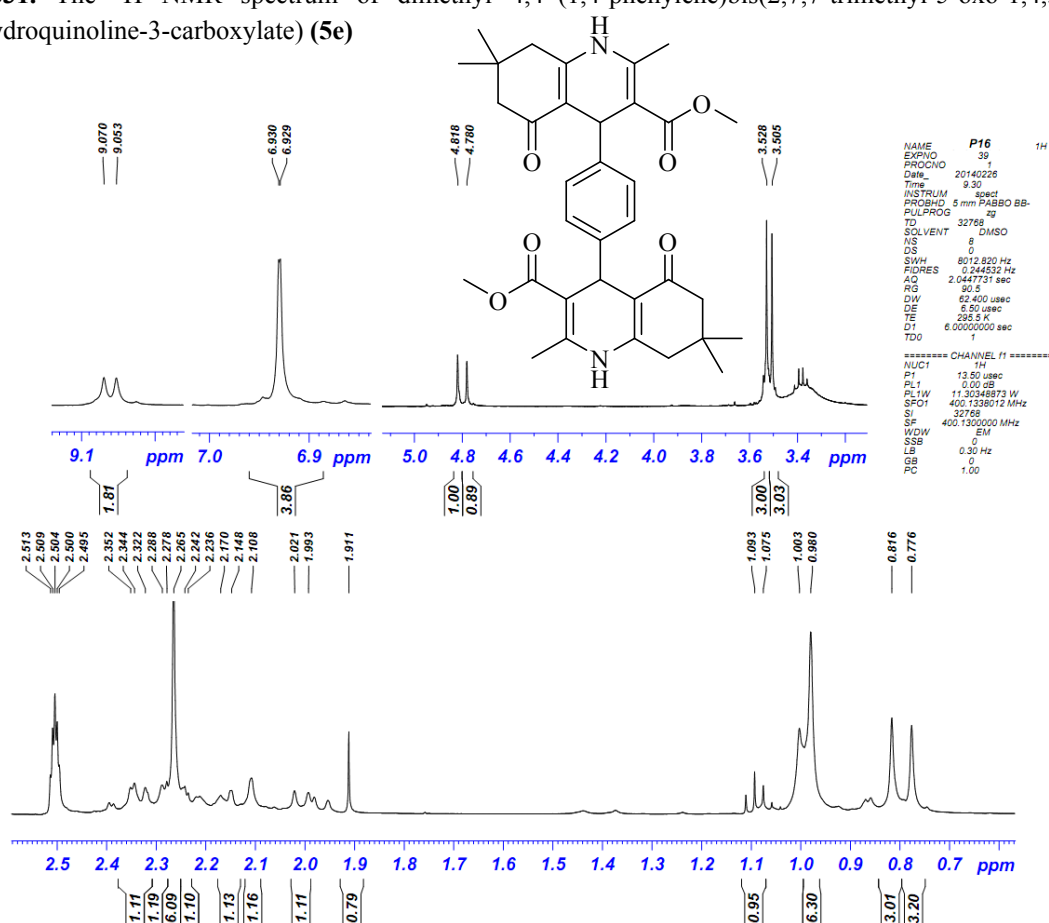

**Fig. S32.** The  $^{13}\text{C}$  NMR spectrum of dimethyl 4,4'-(1,4-phenylene)bis(2,7,7-trimethyl-5-oxo-1,4,5,6,7,8-hexahydroquinoline-3-carboxylate) (**5e**)

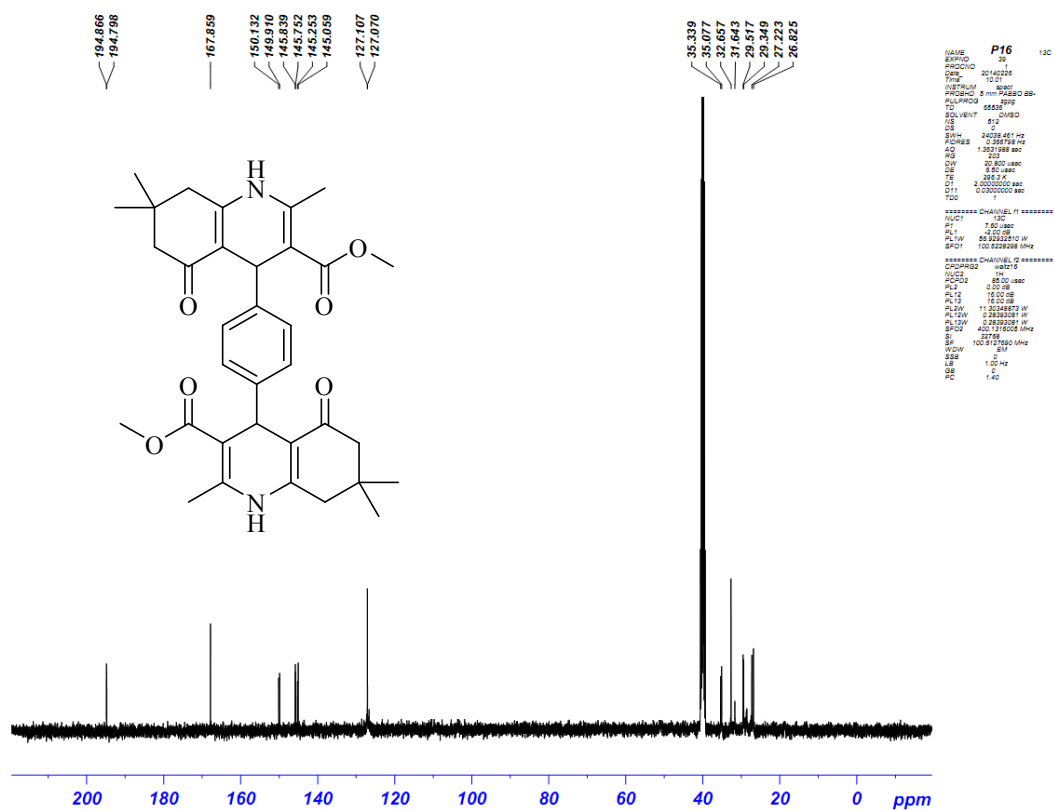

**Fig. S33.** The  $^{13}\text{C}$  NMR spectrum of dimethyl 4,4'-(1,4-phenylene)bis(2,7,7-trimethyl-5-oxo-1,4,5,6,7,8-hexahydroquinoline-3-carboxylate) (**5e**)

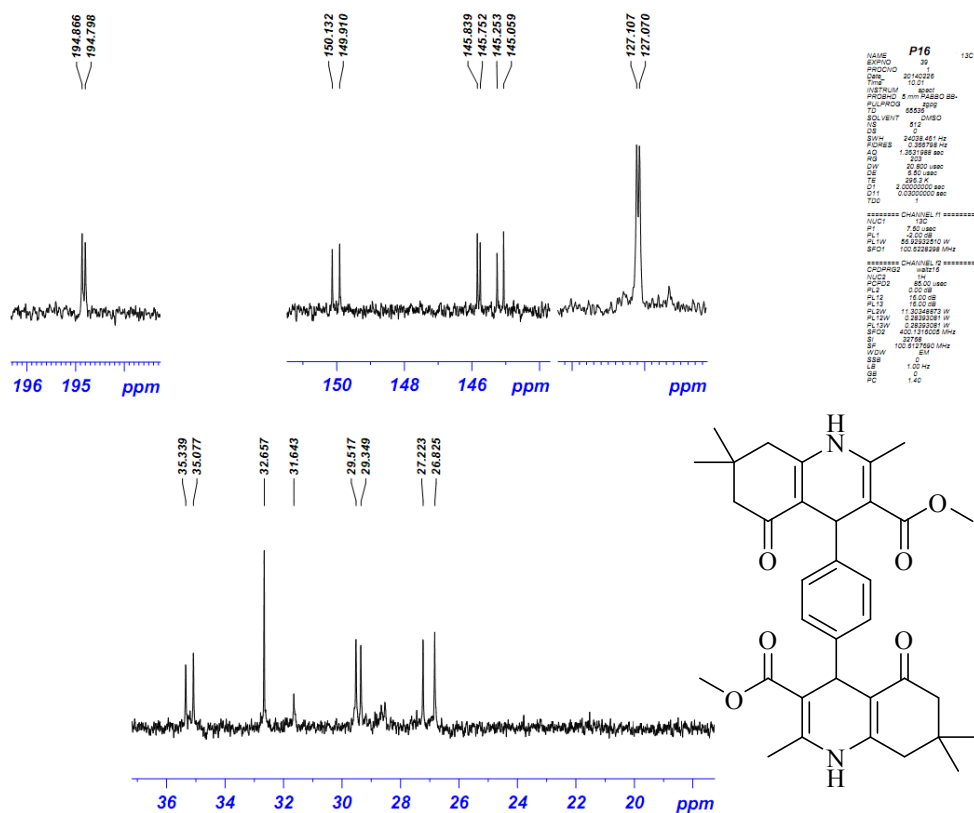

**Fig. S34.** The Mass spectrum of dimethyl 4,4'-(1,4-phenylene)bis(2,7,7-trimethyl-5-oxo-1,4,5,6,7,8-hexahydroquinoline-3-carboxylate) (**5e**)

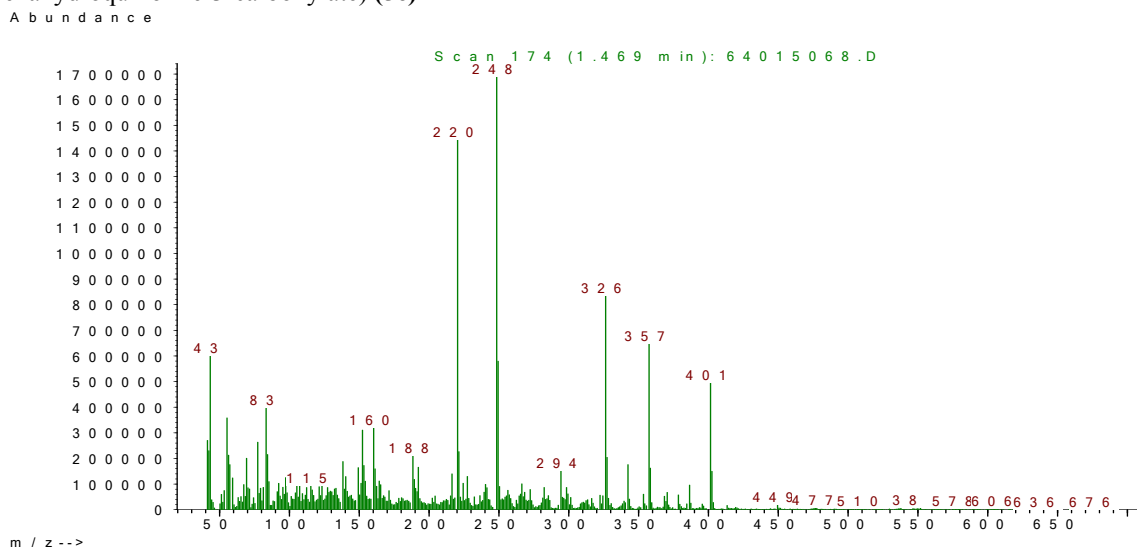

**Fig. S35.** The IR spectrum of methyl 4-(2,5-dimethoxyphenyl)-2,7,7-trimethyl-5-oxo-1,4,5,6,7,8-hexahydroquinoline-3-carboxylate (**5f**)

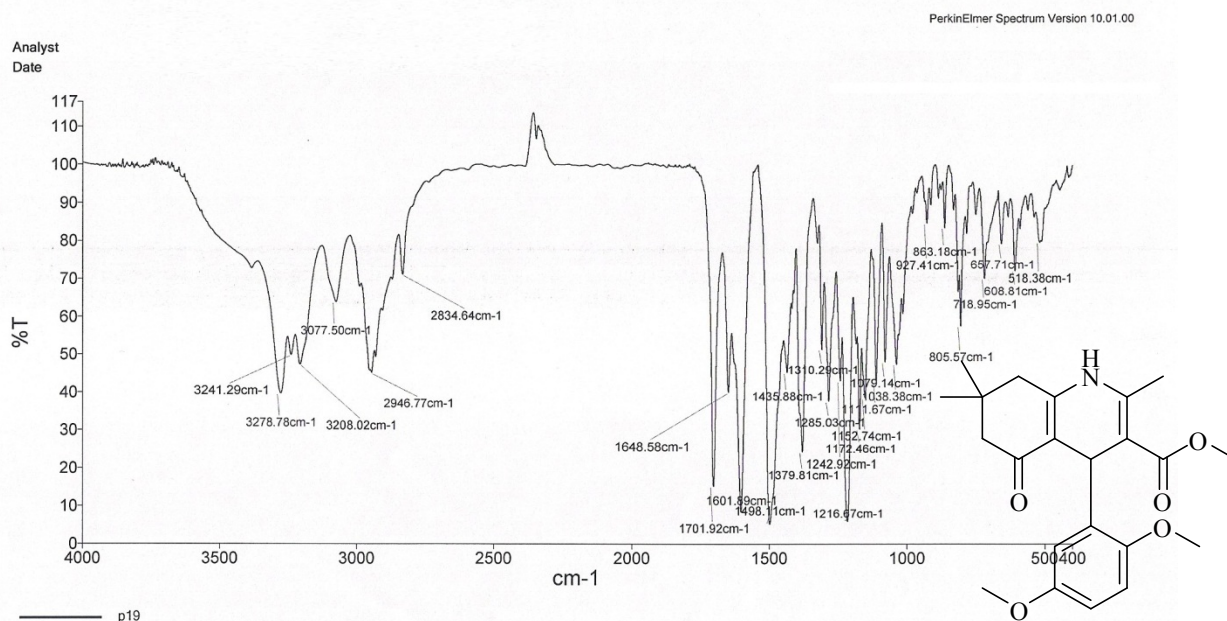

**Fig. S36.** The  $^1\text{H}$  NMR spectrum of methyl 4-(2,5-dimethoxyphenyl)-2,7,7-trimethyl-5-oxo-1,4,5,6,7,8-hexahydroquinoline-3-carboxylate (**5f**)

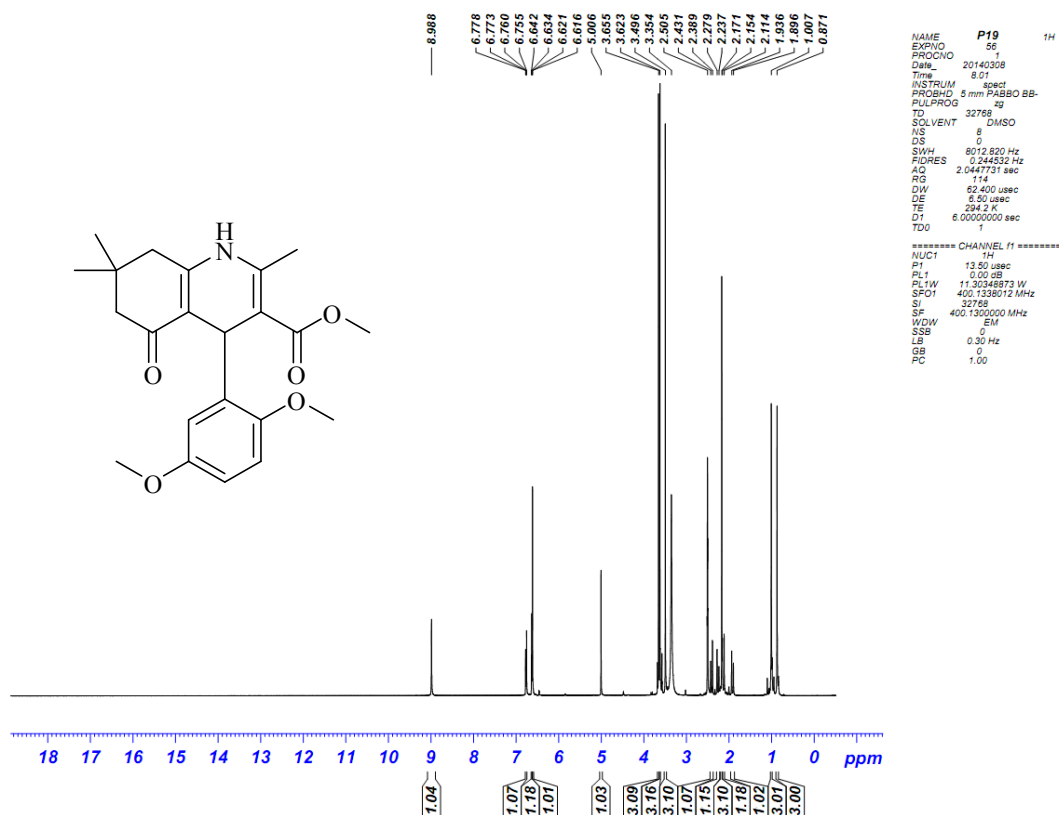

**Fig. S37.** The  $^1\text{H}$  NMR spectrum of methyl 4-(2,5-dimethoxyphenyl)-2,7,7-trimethyl-5-oxo-1,4,5,6,7,8-hexahydroquinoline-3-carboxylate (5f)

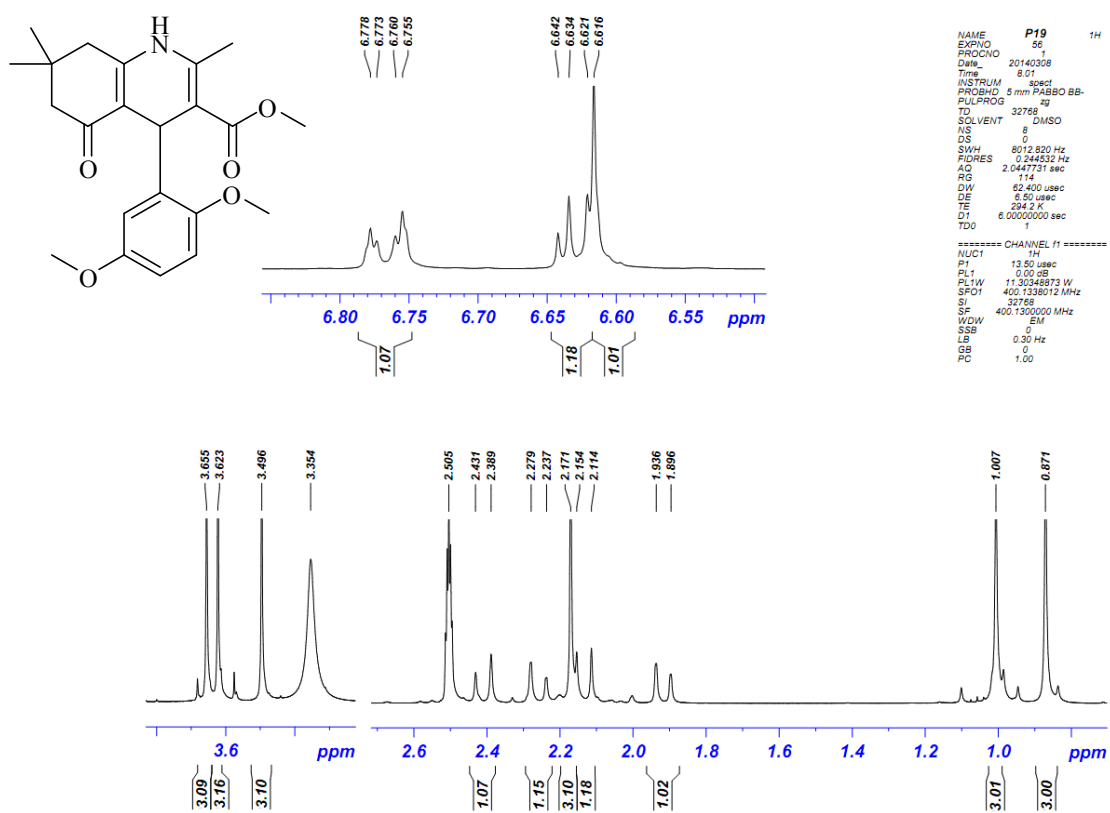

**Fig. S38.** The  $^{13}\text{C}$  NMR spectrum of methyl 4-(2,5-dimethoxyphenyl)-2,7,7-trimethyl-5-oxo-1,4,5,6,7,8-hexahydroquinoline-3-carboxylate (**5f**)

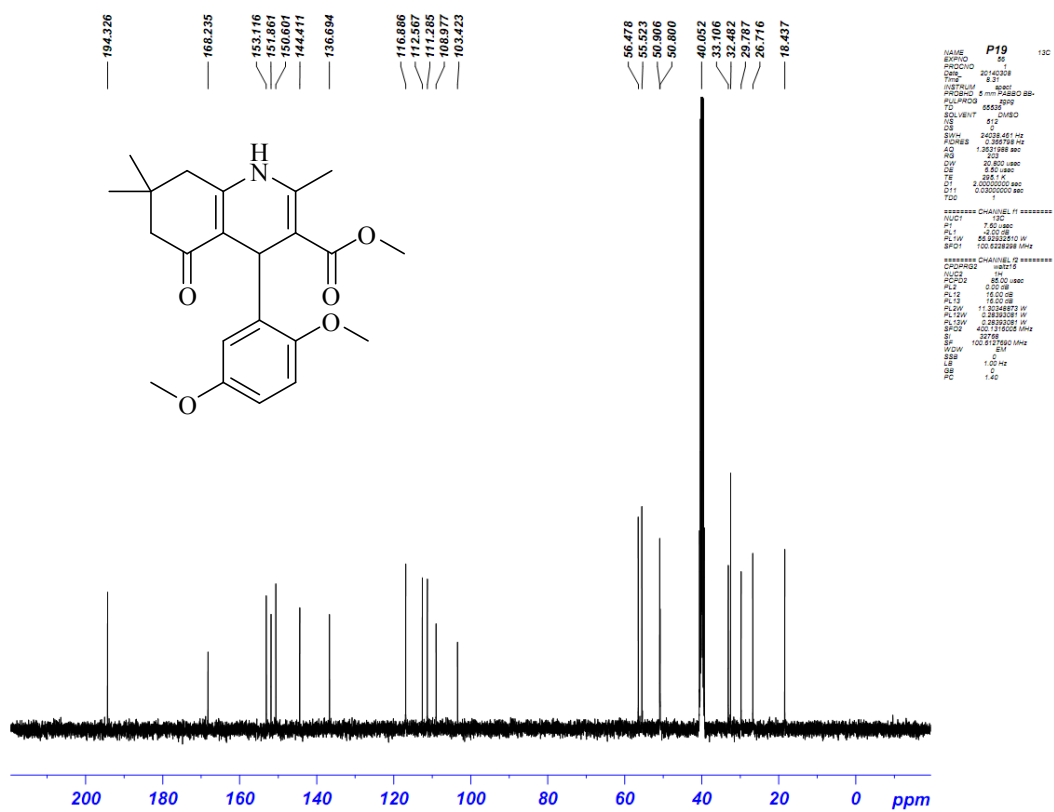

**Fig. S39.** The  $^{13}\text{C}$  NMR spectrum of methyl 4-(2,5-dimethoxyphenyl)-2,7,7-trimethyl-5-oxo-1,4,5,6,7,8-hexahydroquinoline-3-carboxylate (**5f**)

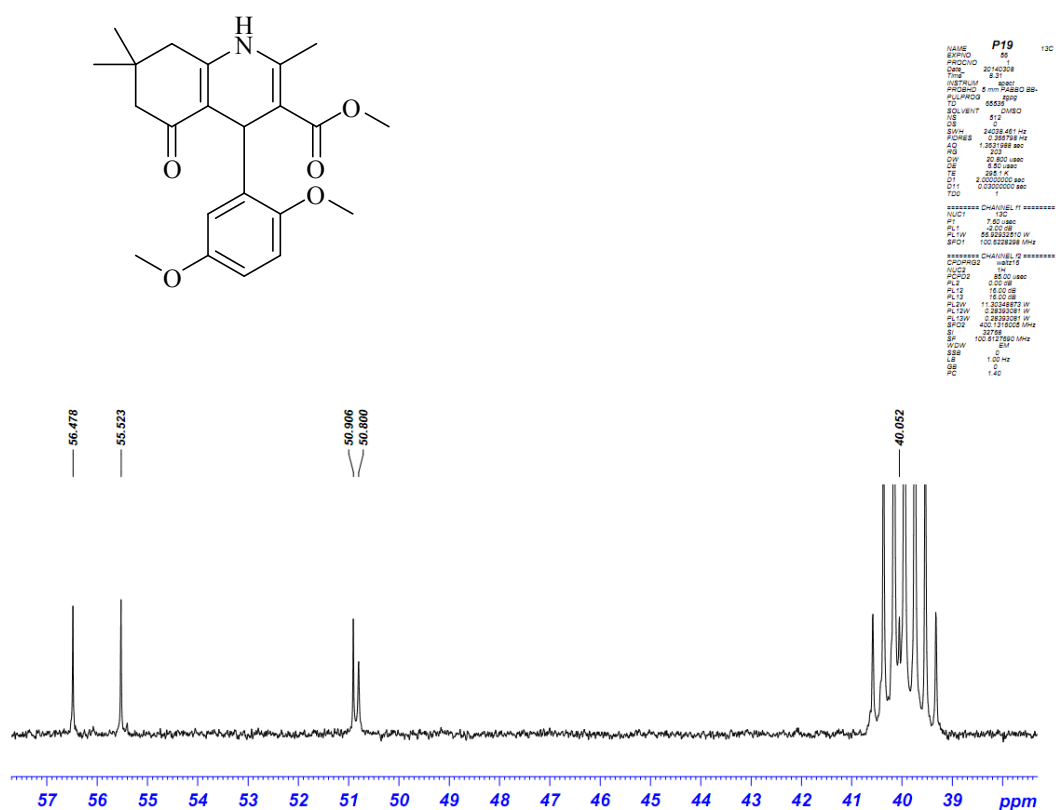

**Fig. S40.** The Mass spectrum of methyl 4-(2,5-dimethoxyphenyl)-2,7,7-trimethyl-5-oxo-1,4,5,6,7,8-hexahydroquinoline-3-carboxylate (**5f**)

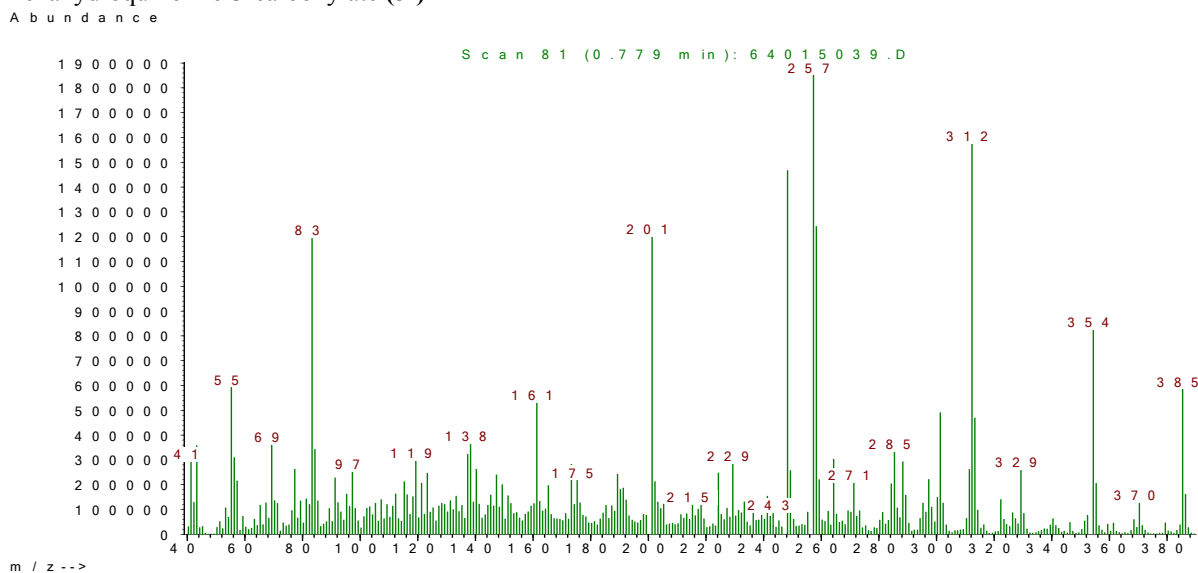

**Fig. S41.** The IR spectrum of methyl 2,7,7-trimethyl-5-oxo-4-(1-phenylprop-1-en-2-yl)-1,4,5,6,7,8-hexahydroquinoline-3-carboxylate (**5g**)

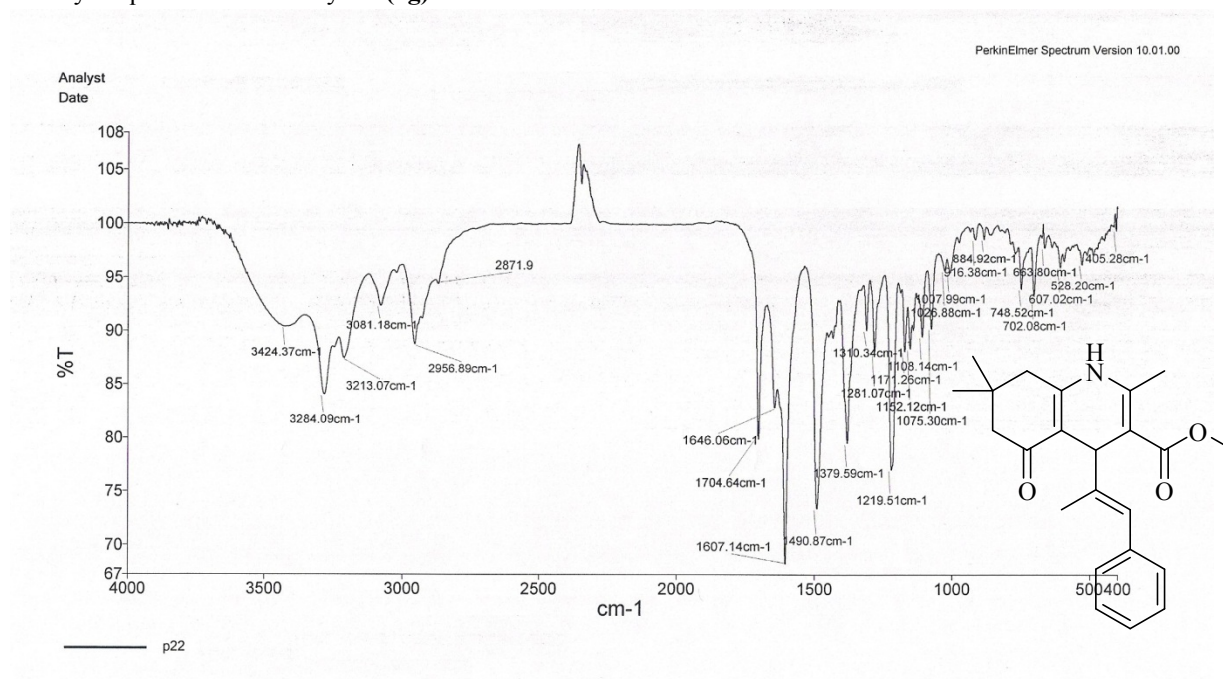

**Fig. S42.** The <sup>1</sup>H NMR spectrum of methyl 2,7,7-trimethyl-5-oxo-4-(1-phenylprop-1-en-2-yl)-1,4,5,6,7,8-hexahydroquinoline-3-carboxylate (**5g**)

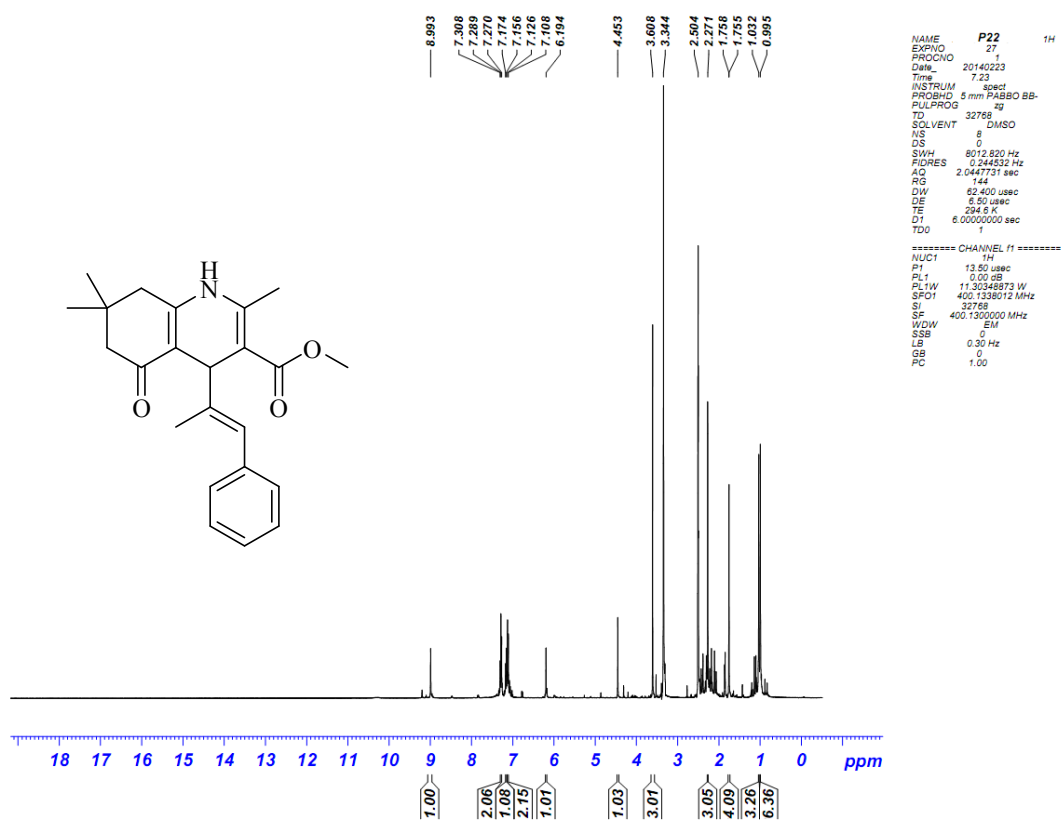



**Fig. S43.** The  $^1\text{H}$  NMR spectrum of methyl 2,7,7-trimethyl-5-oxo-4-(1-phenylprop-1-en-2-yl)-1,4,5,6,7,8-hexahydroquinoline-3-carboxylate (**5g**)

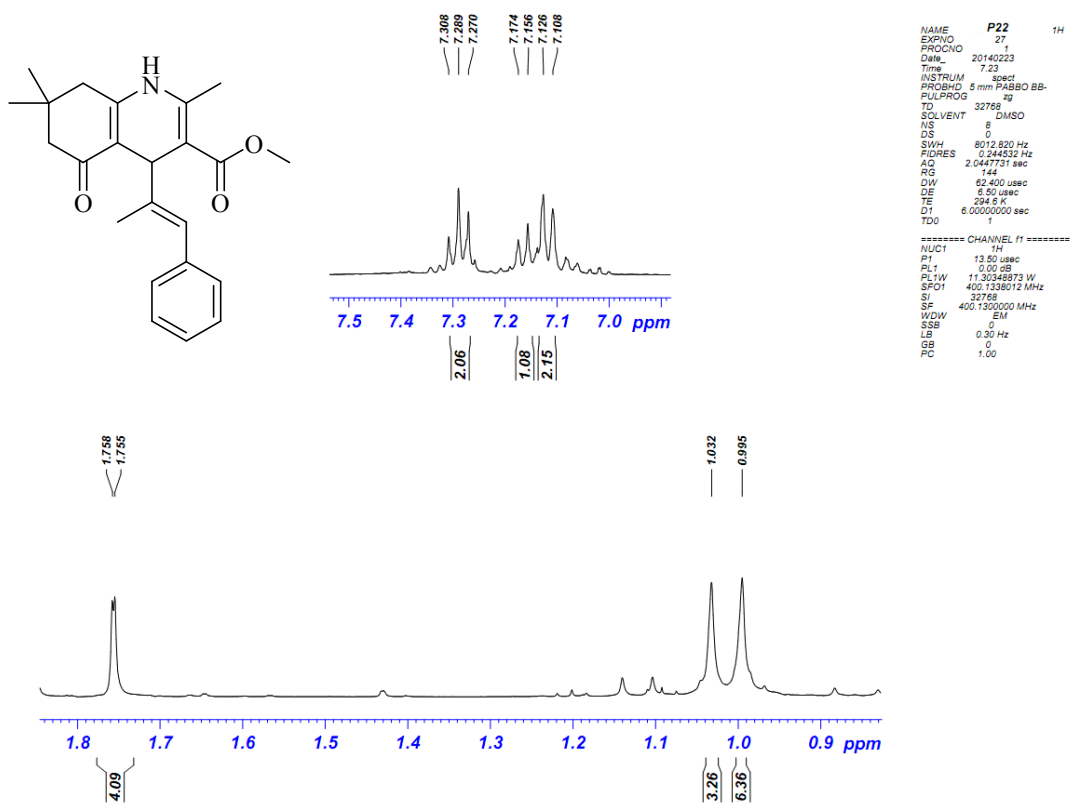

**Fig. S44.** The  $^{13}\text{C}$  NMR spectrum of methyl 2,7,7-trimethyl-5-oxo-4-(1-phenylprop-1-en-2-yl)-1,4,5,6,7,8-hexahydroquinoline-3-carboxylate (**5g**)

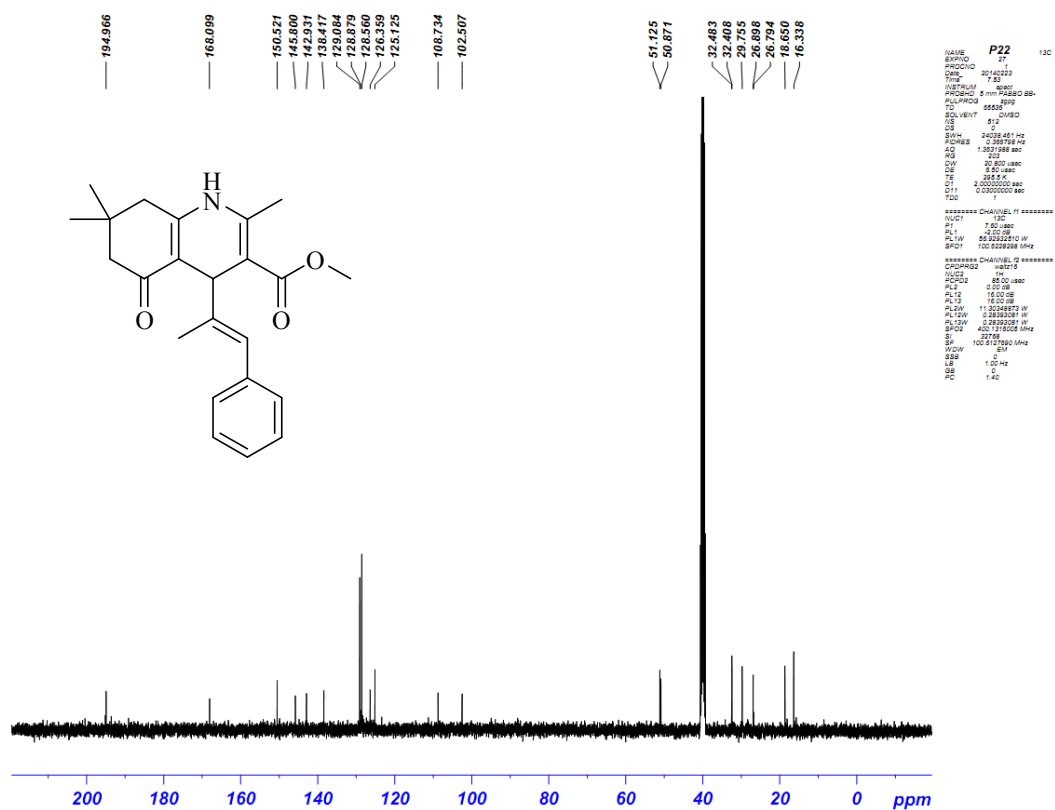

**Fig. S45.** The  $^{13}\text{C}$  NMR spectrum of methyl 2,7,7-trimethyl-5-oxo-4-(1-phenylprop-1-en-2-yl)-1,4,5,6,7,8-hexahydroquinoline-3-carboxylate (**5g**)

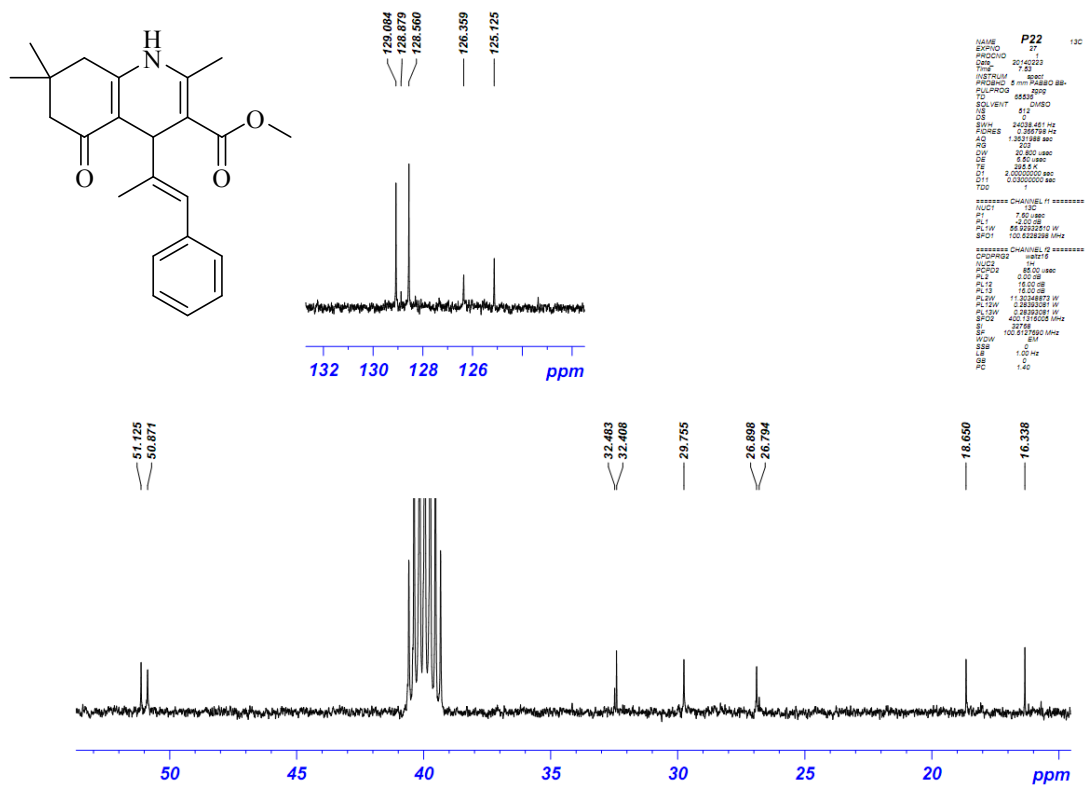

**Fig. S46.** The Mass spectrum of methyl 2,7,7-trimethyl-5-oxo-4-(1-phenylprop-1-en-2-yl)-1,4,5,6,7,8-hexahydroquinoline-3-carboxylate (**5g**)

Abundance

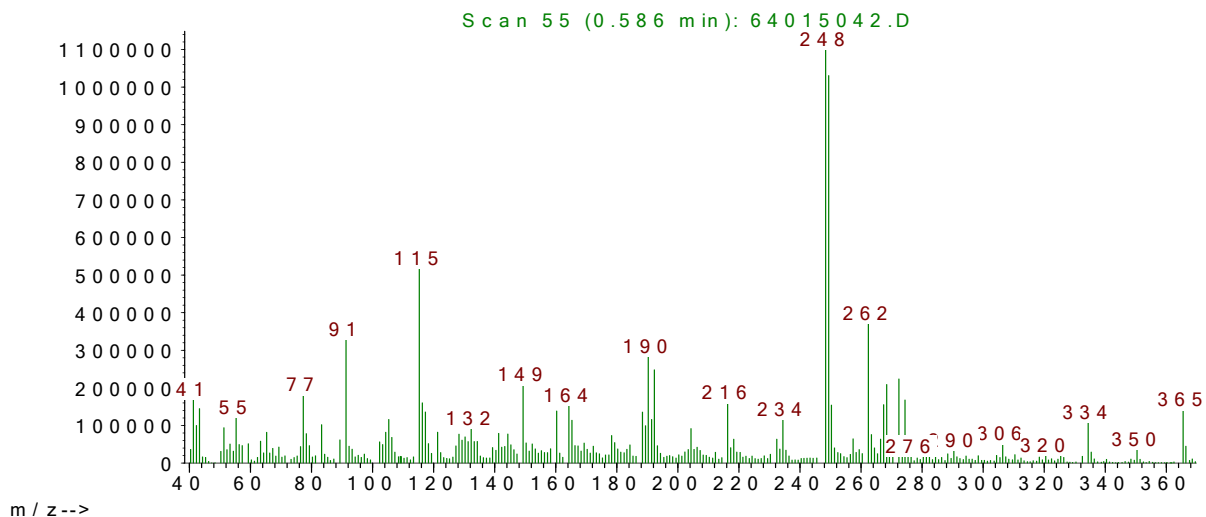

**Fig. S47.** The IR spectrum of methyl 4-(4-hydroxy-3-methoxyphenyl)-2,7,7-trimethyl-5-oxo-1,4,5,6,7,8-hexahydroquinoline-3-carboxylate (**5h**)

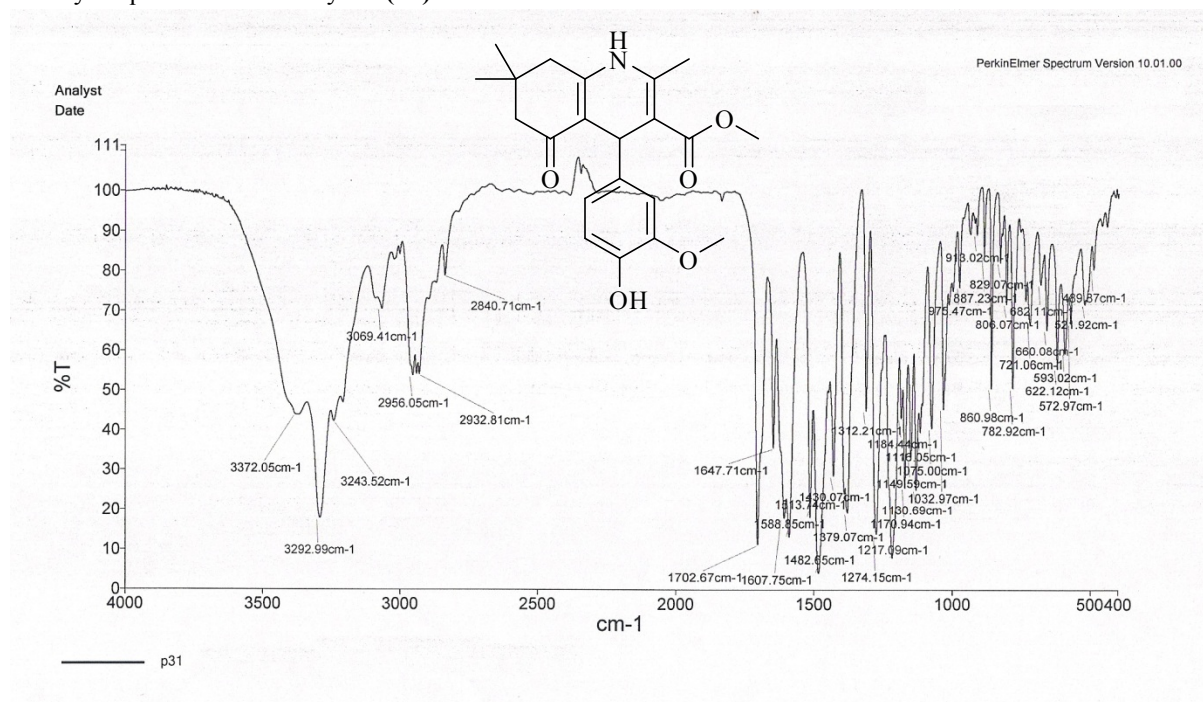

**Fig. S48.** The <sup>1</sup>H NMR spectrum of methyl 4-(4-hydroxy-3-methoxyphenyl)-2,7,7-trimethyl-5-oxo-1,4,5,6,7,8-hexahydroquinoline-3-carboxylate (**5h**)

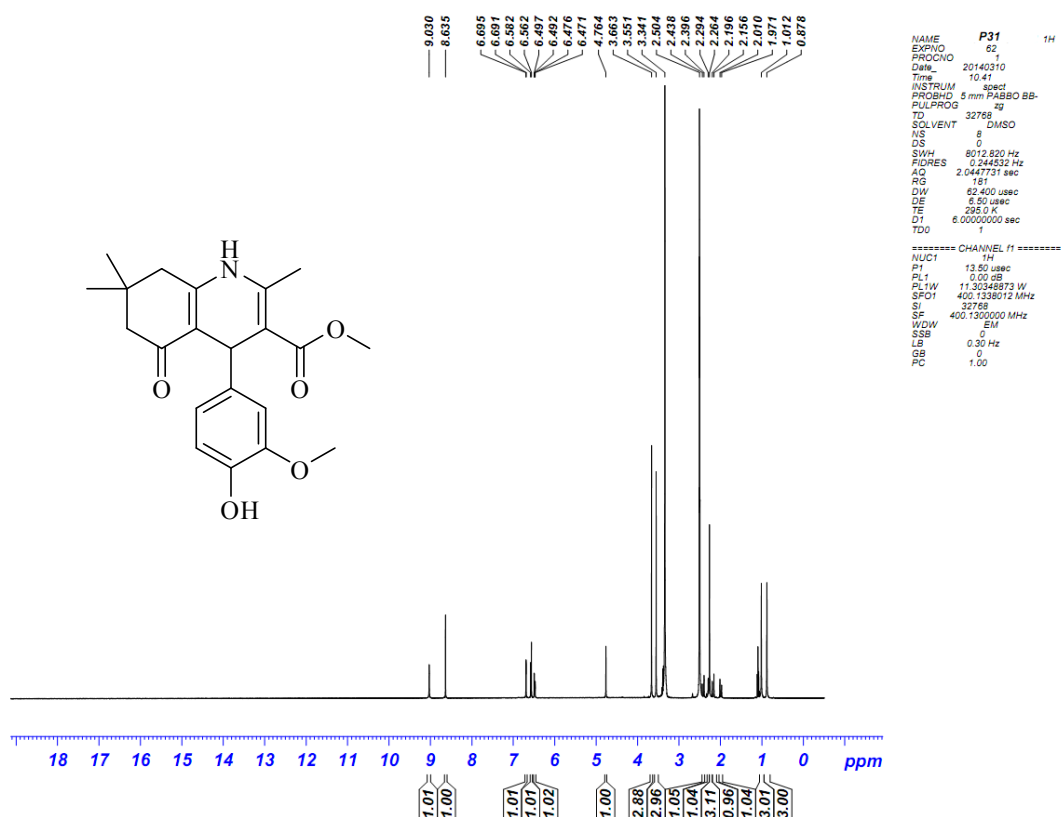

**Fig. S49.** The  $^1\text{H}$  NMR spectrum of methyl 4-(4-hydroxy-3-methoxyphenyl)-2,7,7-trimethyl-5-oxo-1,4,5,6,7,8-hexahydroquinoline-3-carboxylate (**5h**)

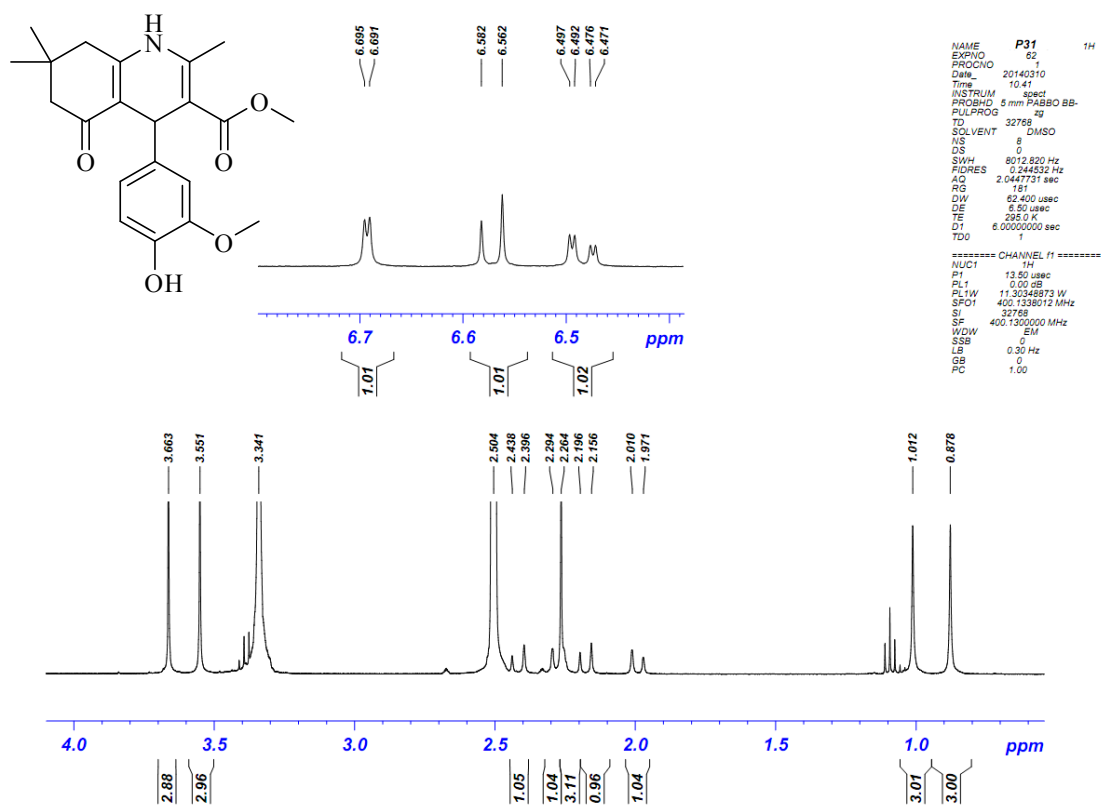

**Fig. S50.** The  $^{13}\text{C}$  NMR spectrum of methyl 4-(4-hydroxy-3-methoxyphenyl)-2,7,7-trimethyl-5-oxo-1,4,5,6,7,8-hexahydroquinoline-3-carboxylate (**5h**)

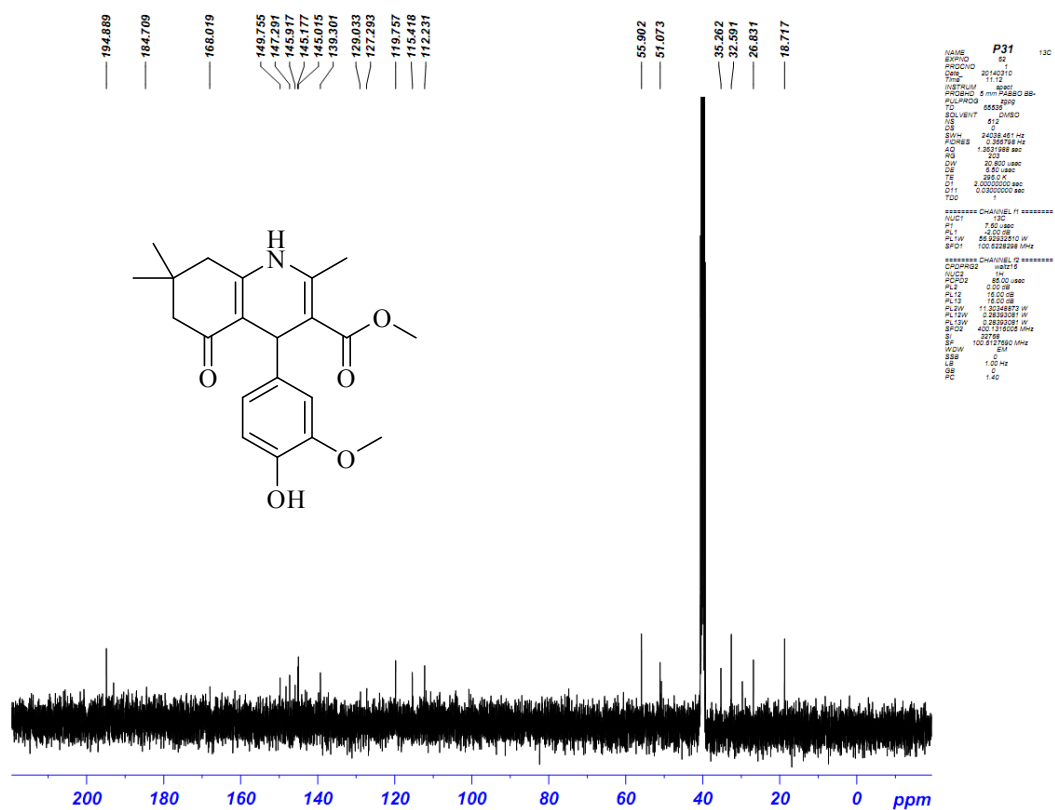

**Fig. S51.** The <sup>13</sup>C NMR spectrum of methyl 4-(4-hydroxy-3-methoxyphenyl)-2,7,7-trimethyl-5-oxo-1,4,5,6,7,8-hexahydroquinoline-3-carboxylate (**5h**)

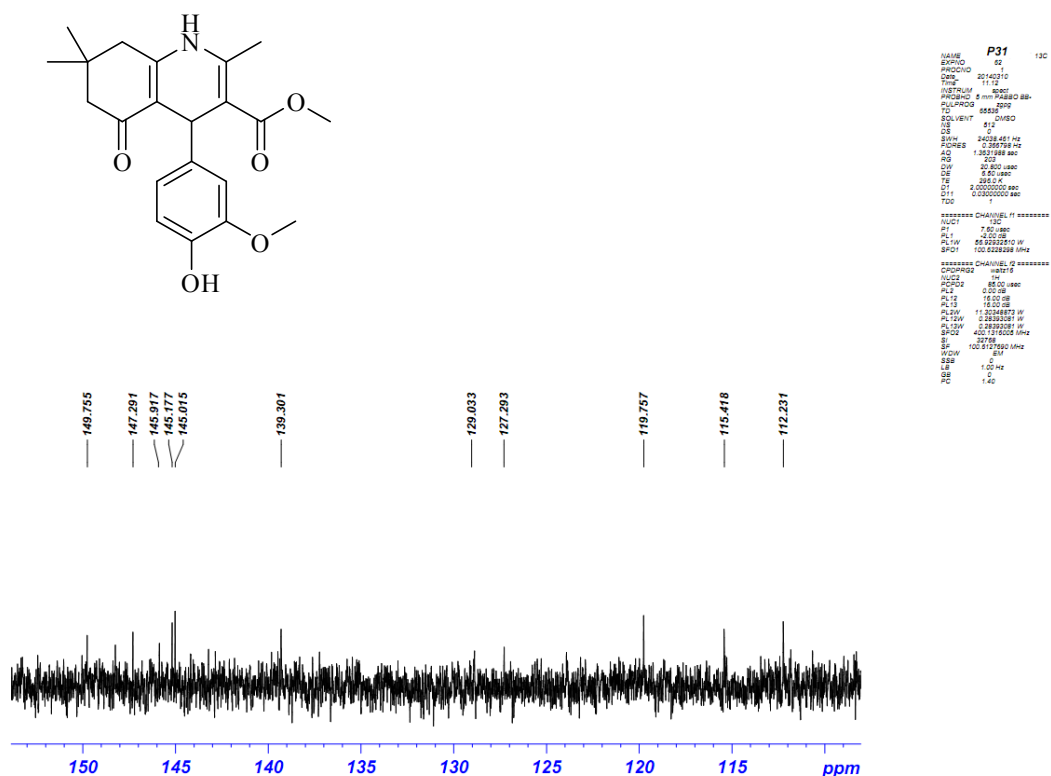

**Fig. S52.** The Mass spectrum of methyl 4-(4-hydroxy-3-methoxyphenyl)-2,7,7-trimethyl-5-oxo-1,4,5,6,7,8-hexahydroquinoline-3-carboxylate (**5h**)

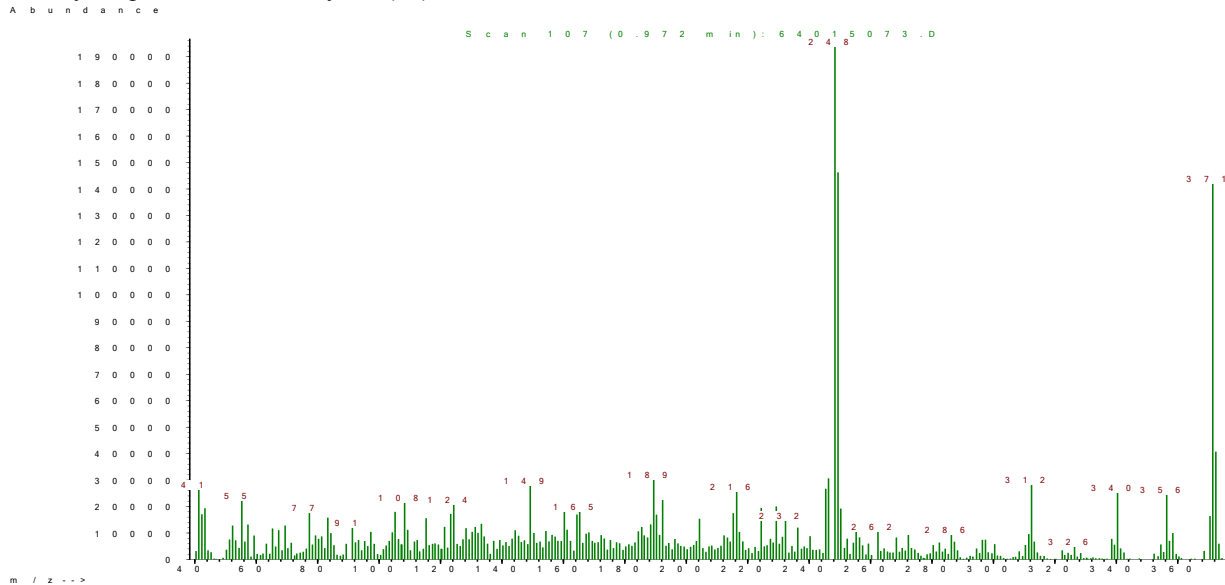

**Fig. S53.** The IR spectrum of methyl 4-(4-(dimethylamino)phenyl)-2,7,7-trimethyl-5-oxo-1,4,5,6,7,8-hexahydroquinoline-3-carboxylate (**5i**)

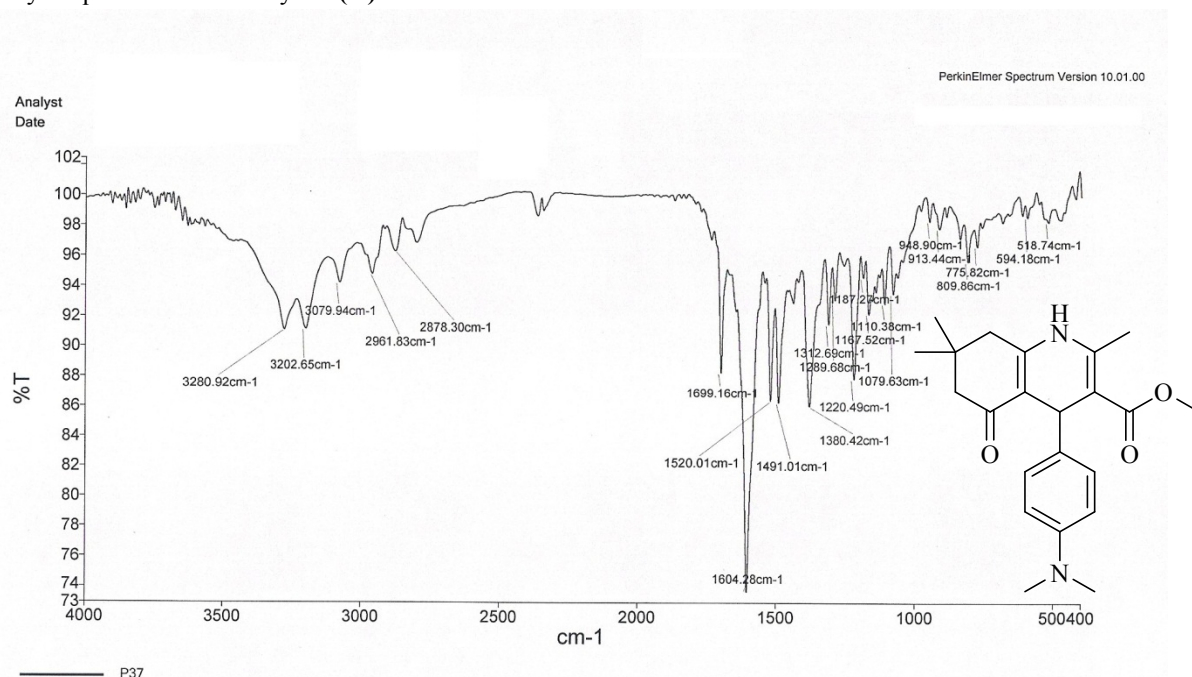

**Fig. S54.** The <sup>1</sup>H NMR spectrum of methyl 4-(4-(dimethylamino)phenyl)-2,7,7-trimethyl-5-oxo-1,4,5,6,7,8-hexahydroquinoline-3-carboxylate (**5i**)

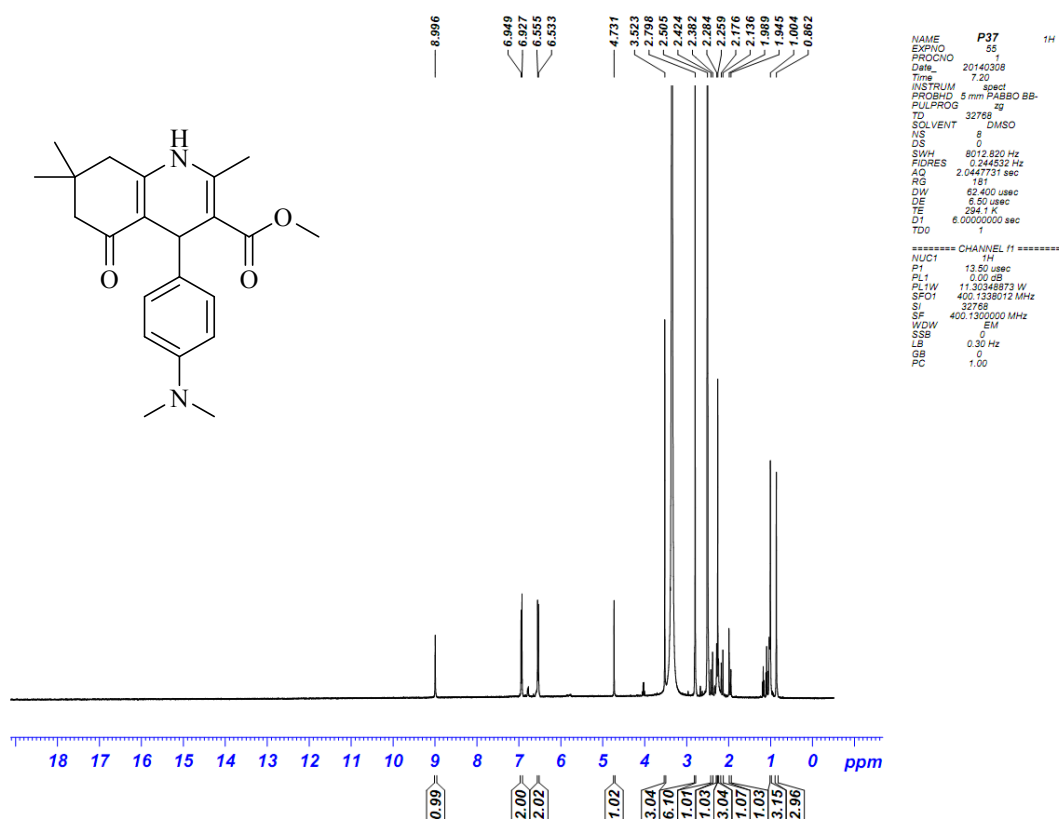



**Fig. S55.** The  $^1\text{H}$  NMR spectrum of methyl 4-(4-(dimethylamino)phenyl)-2,7,7-trimethyl-5-oxo-1,4,5,6,7,8-hexahydroquinoline-3-carboxylate (**5i**)

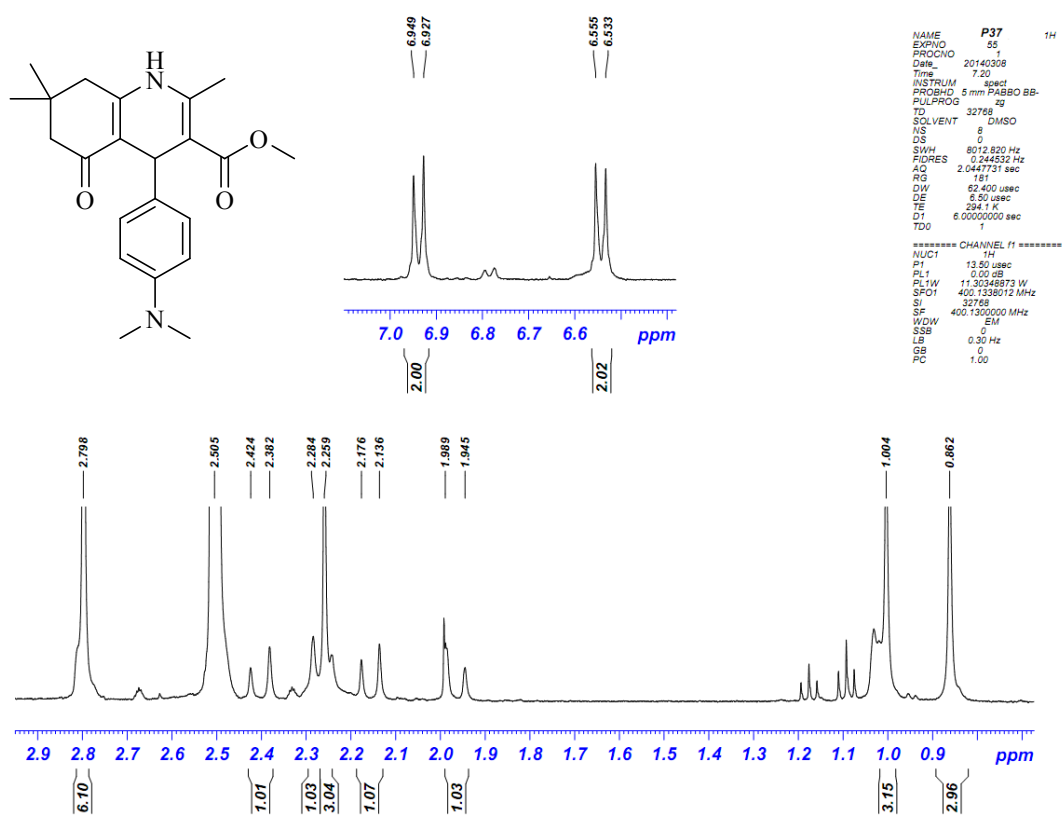

**Fig. S56.** The <sup>13</sup>C NMR spectrum of methyl 4-(4-(dimethylamino)phenyl)-2,7,7-trimethyl-5-oxo-1,4,5,6,7,8-hexahydroquinoline-3-carboxylate (**5i**)

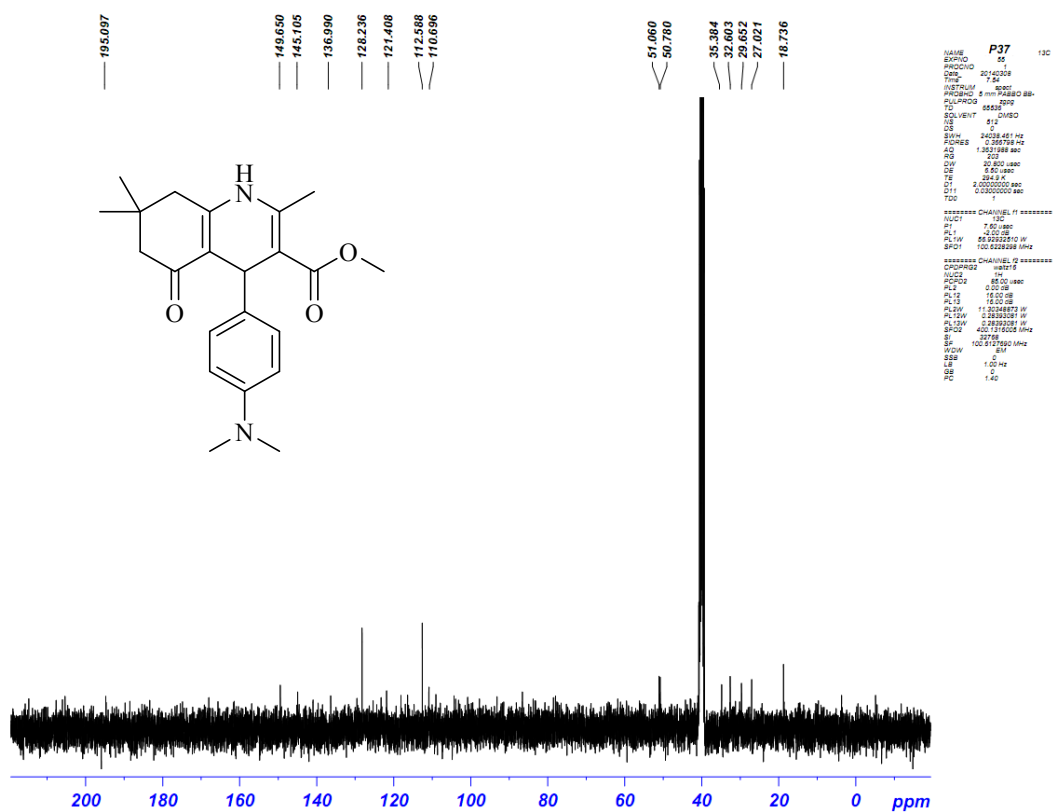

**Fig. S57.** The Mass spectrum of methyl 4-(4-(dimethylamino)phenyl)-2,7,7-trimethyl-5-oxo-1,4,5,6,7,8-hexahydroquinoline-3-carboxylate (**5i**)

Abundance

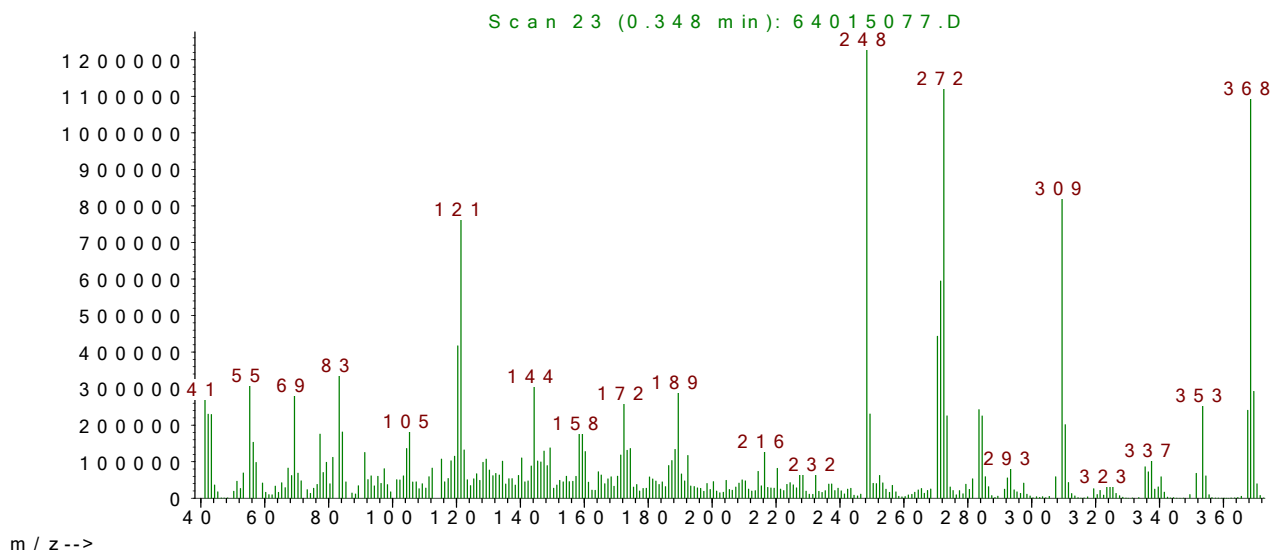

**Fig. S58.** The IR spectrum of ethyl 4-(2,5-dimethoxyphenyl)-2-methyl-5-oxo-1,4,5,6,7,8-hexahydroquinoline-3-carboxylate (**6a**)

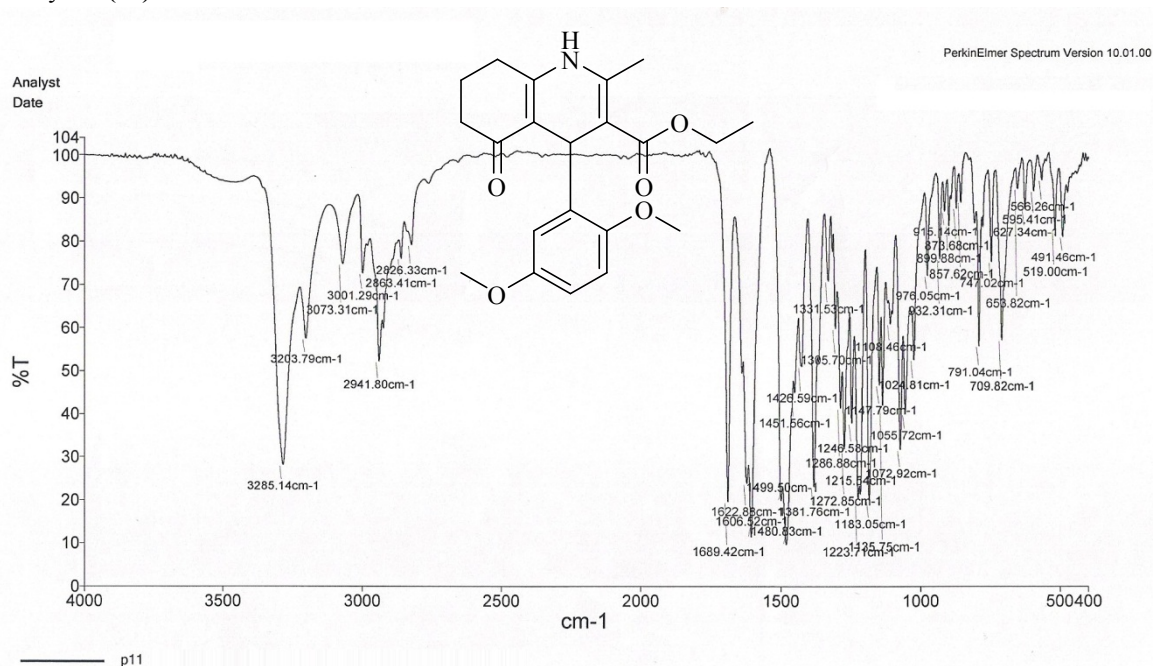

**Fig. S59.** The  $^1\text{H}$  NMR spectrum of ethyl 4-(2,5-dimethoxyphenyl)-2-methyl-5-oxo-1,4,5,6,7,8-hexahydroquinoline-3-carboxylate (**6a**)

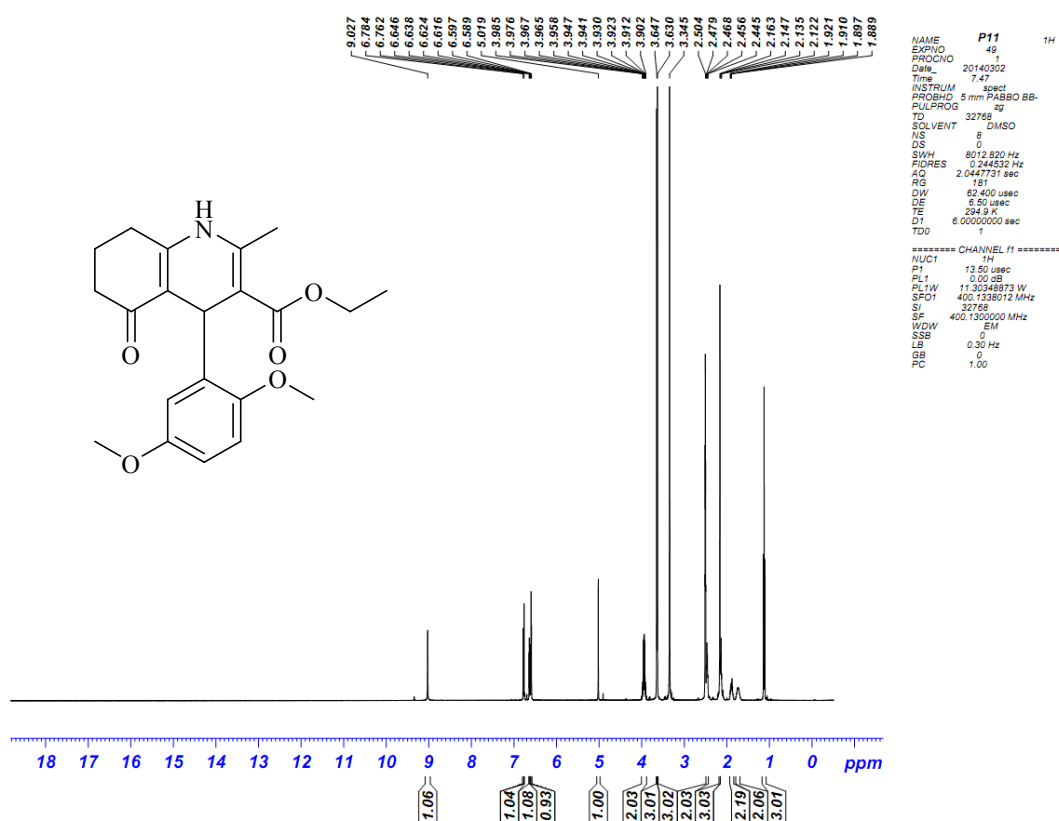

**Fig. S60.** The  $^1\text{H}$  NMR spectrum of ethyl 4-(2,5-dimethoxyphenyl)-2-methyl-5-oxo-1,4,5,6,7,8-hexahydroquinoline-3-carboxylate (**6a**)

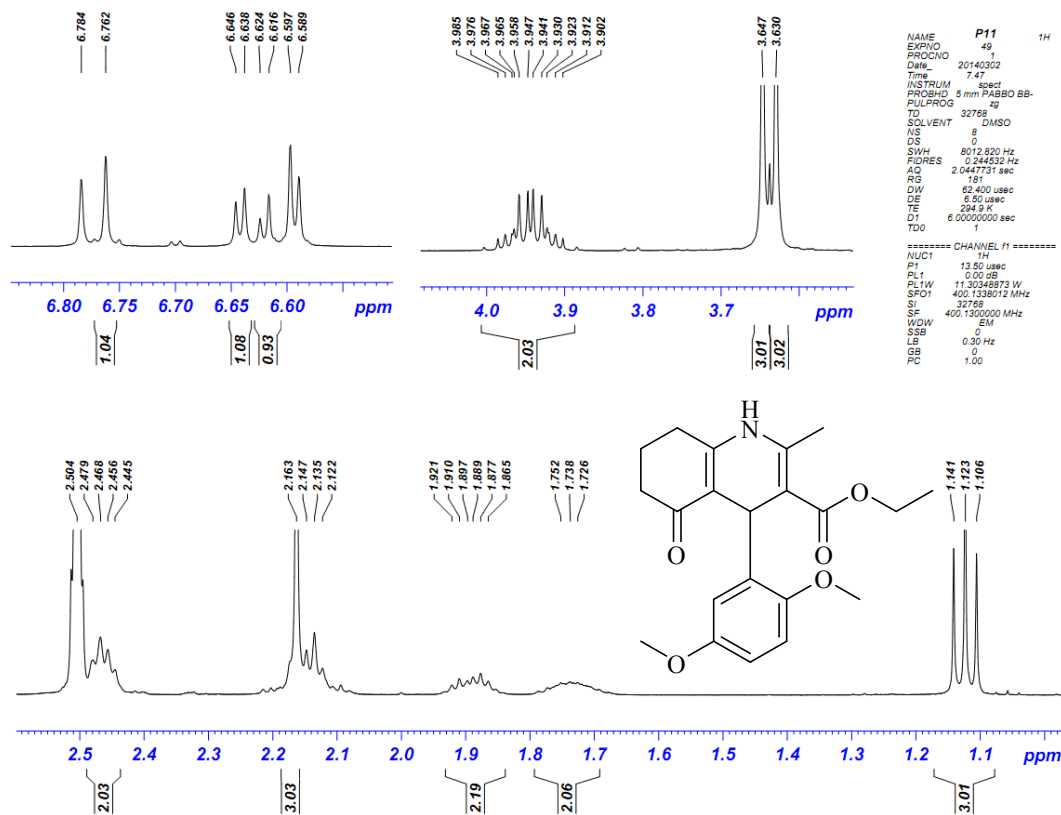

**Fig. S61.** The  $^{13}\text{C}$  NMR spectrum of ethyl 4-(2,5-dimethoxyphenyl)-2-methyl-5-oxo-1,4,5,6,7,8-hexahydroquinoline-3-carboxylate (**6a**)

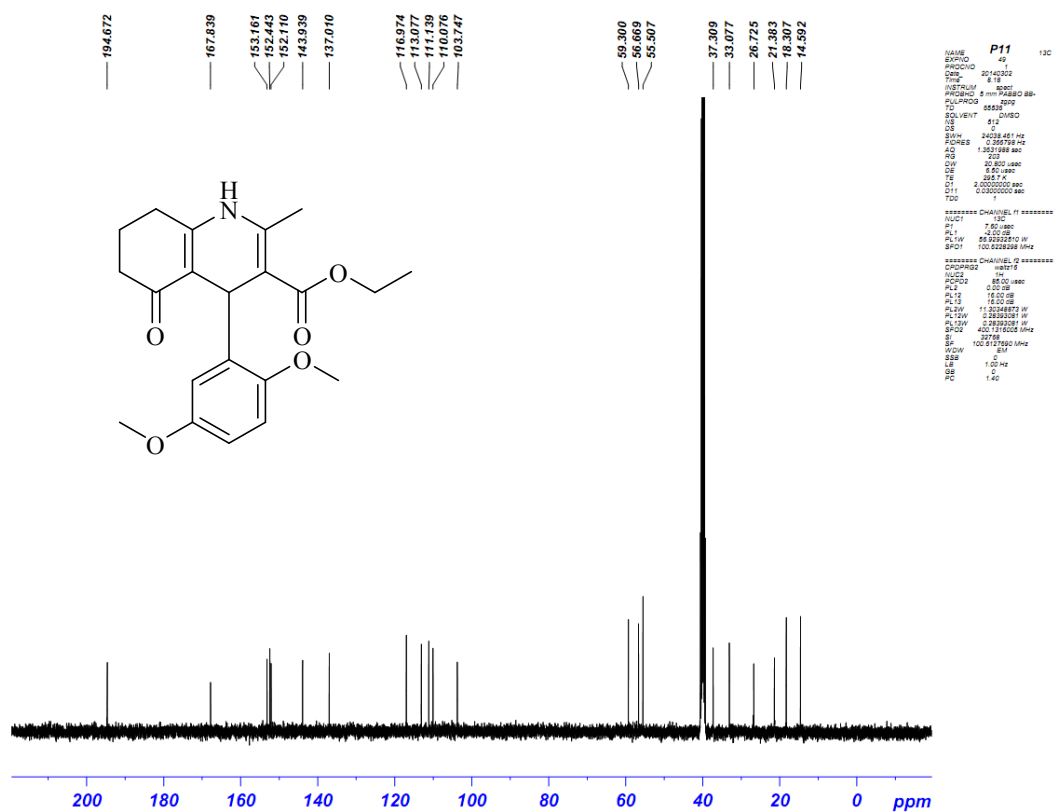

**Fig. S62.** The  $^{13}\text{C}$  NMR spectrum of ethyl 4-(2,5-dimethoxyphenyl)-2-methyl-5-oxo-1,4,5,6,7,8-hexahydroquinoline-3-carboxylate (**6a**)

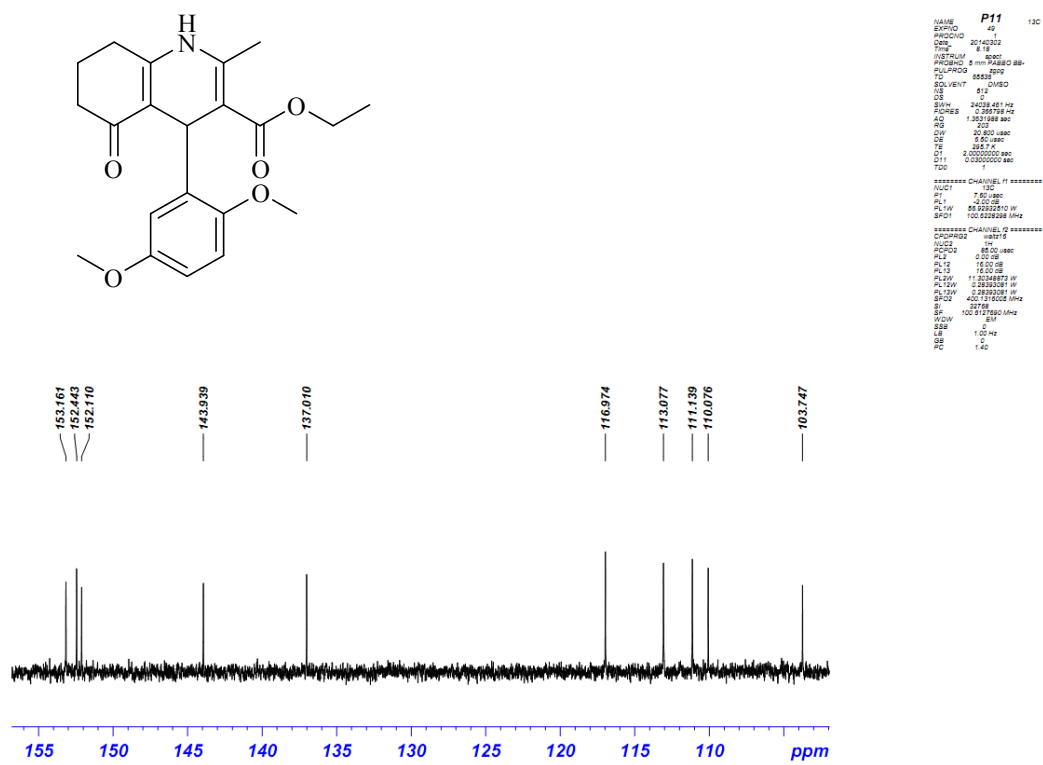

**Fig. S63.** The Mass spectrum of ethyl 4-(2,5-dimethoxyphenyl)-2-methyl-5-oxo-1,4,5,6,7,8-hexahydroquinoline-3-carboxylate (**6a**)

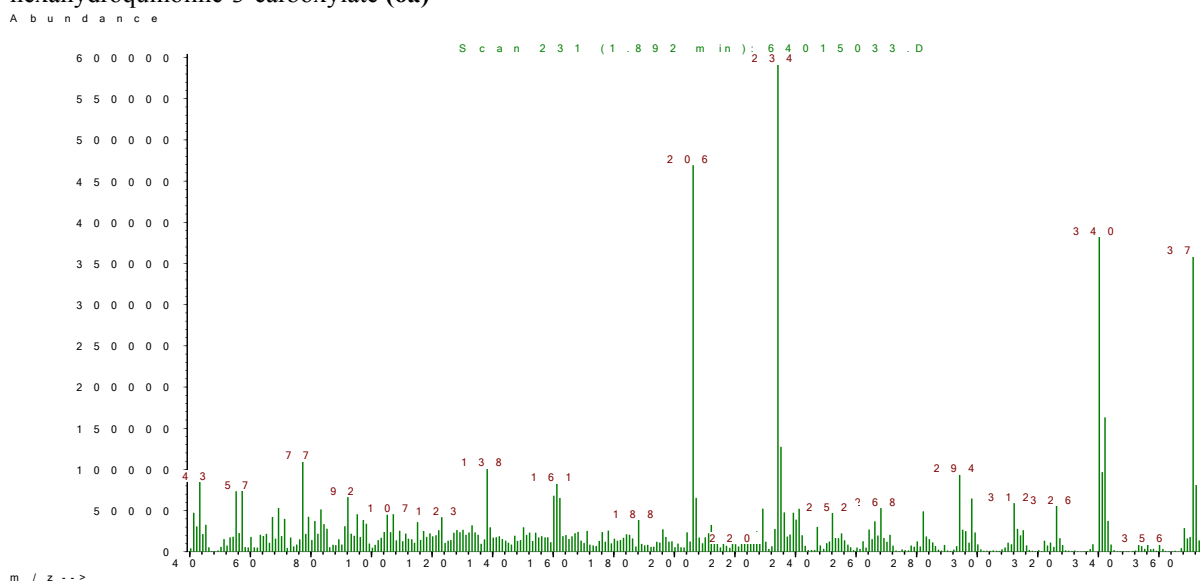

**Fig. S64.** The IR spectrum of ethyl 4-(biphenyl-4-yl)-2,7,7-trimethyl-5-oxo-1,4,5,6,7,8-hexahydroquinoline-3-carboxylate (**6b**)

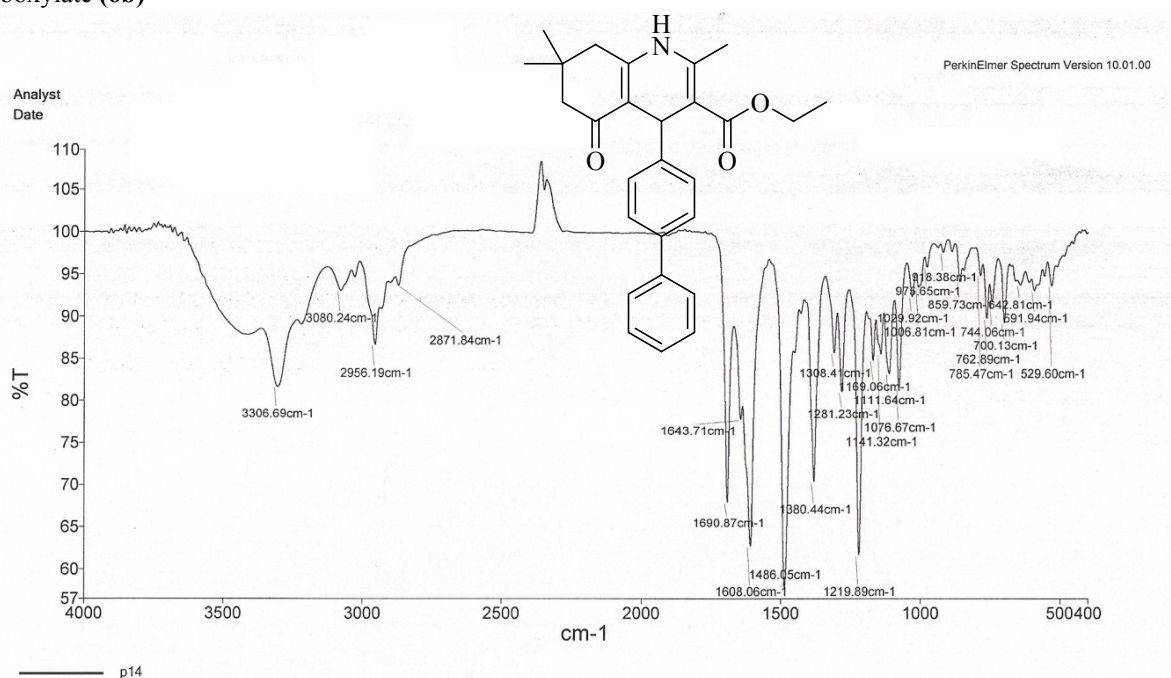

**Fig. S65.** The  $^1\text{H}$  NMR spectrum of ethyl 4-(biphenyl-4-yl)-2,7,7-trimethyl-5-oxo-1,4,5,6,7,8-hexahydroquinoline-3-carboxylate (**6b**)

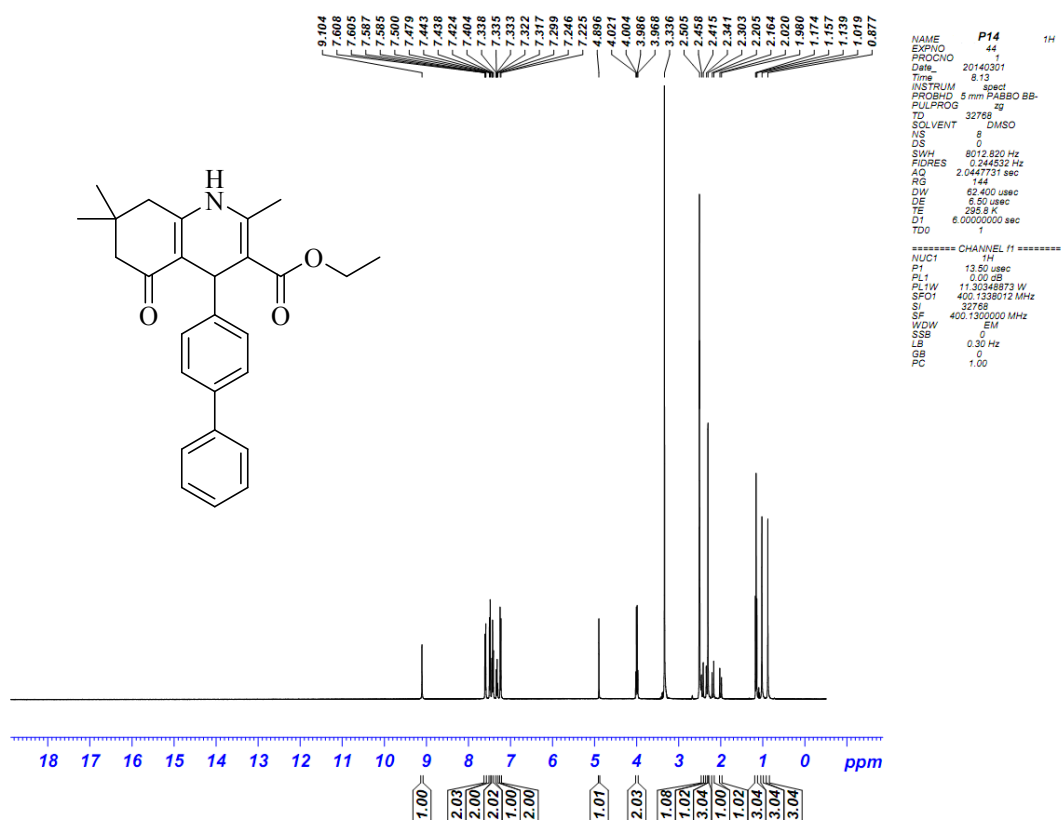

**Fig. S66.** The  $^1\text{H}$  NMR spectrum of ethyl 4-(biphenyl-4-yl)-2,7,7-trimethyl-5-oxo-1,4,5,6,7,8-hexahydroquinoline-3-carboxylate (**6b**)

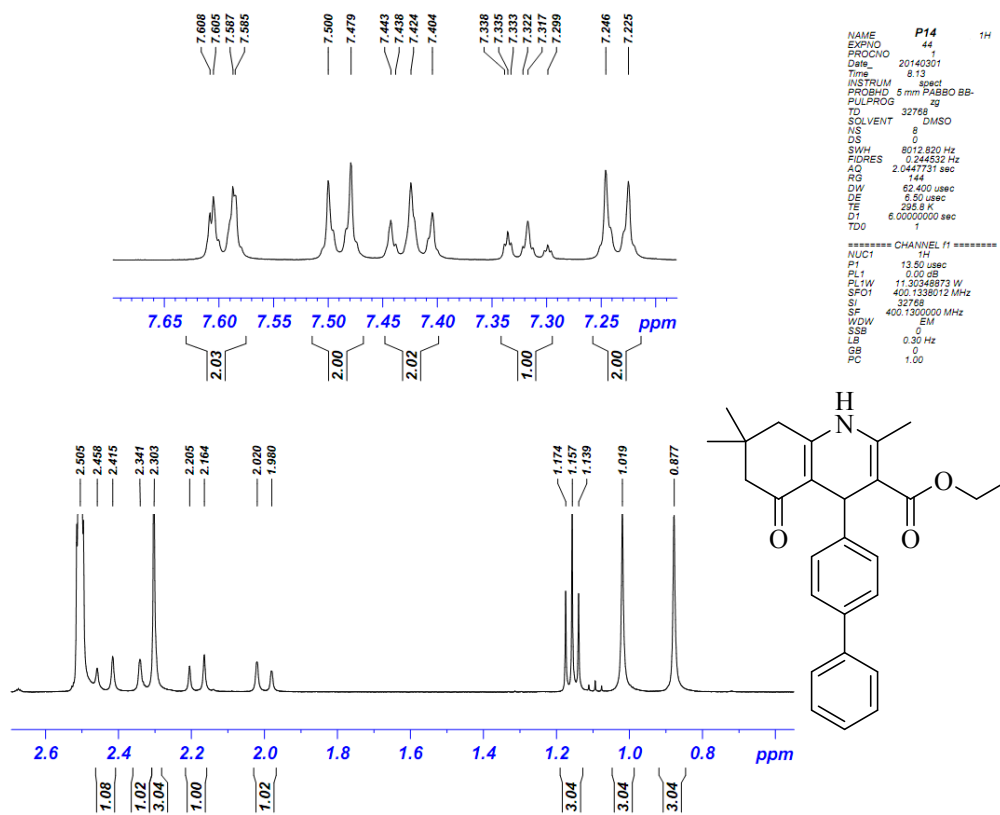



**Fig. S67.** The  $^{13}\text{C}$  NMR spectrum of ethyl 4-(biphenyl-4-yl)-2,7,7-trimethyl-5-oxo-1,4,5,6,7,8-hexahydroquinoline-3-carboxylate (**6b**)

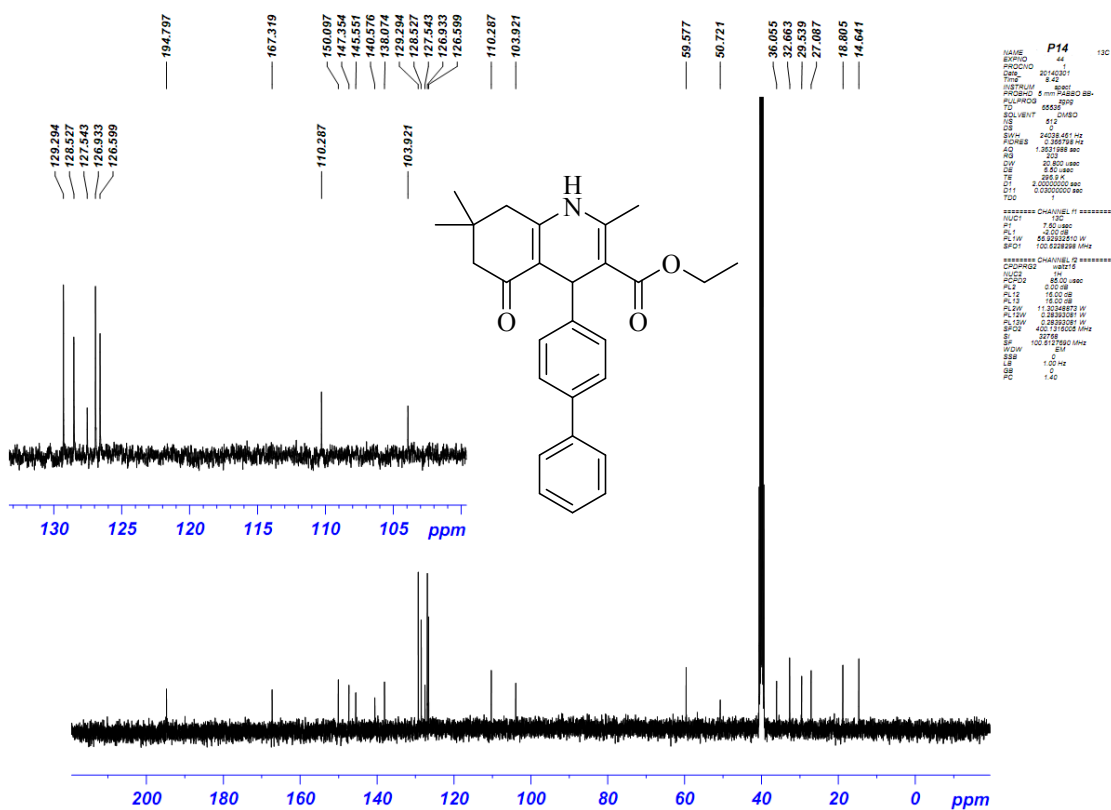

**Fig. S68.** The Mass spectrum of ethyl 4-(biphenyl-4-yl)-2,7,7-trimethyl-5-oxo-1,4,5,6,7,8-hexahydroquinoline-3-carboxylate (**6b**)

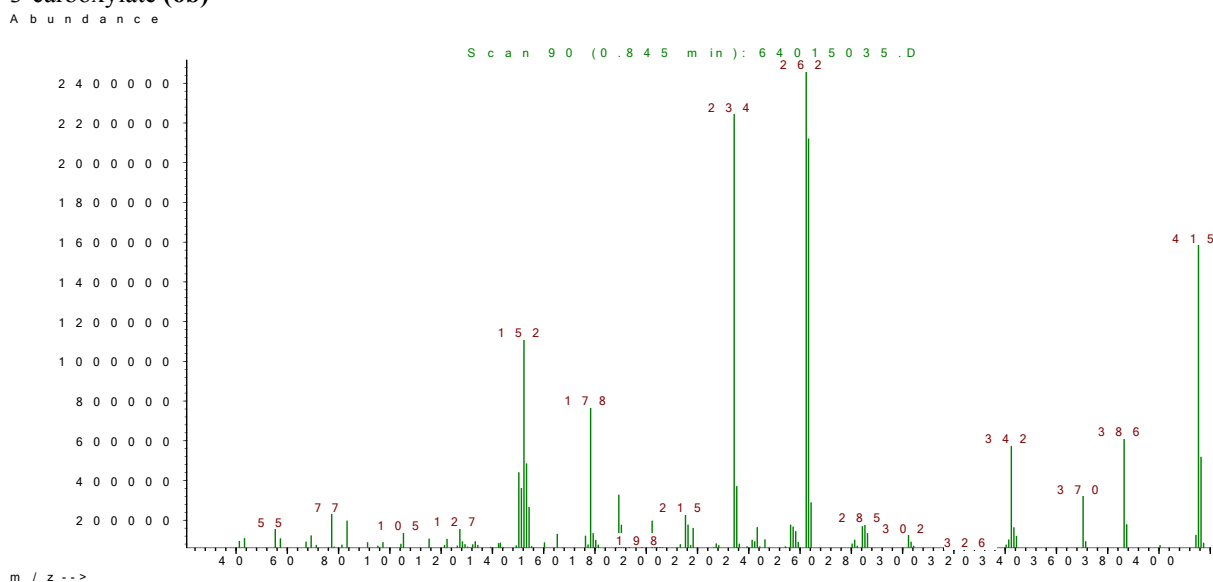

**Fig. S69.** The IR spectrum of diethyl 4,4'-(1,4-phenylene)bis(2,7,7-trimethyl-5-oxo-1,4,5,6,7,8-hexahydroquinoline-3-carboxylate) (**6c**)

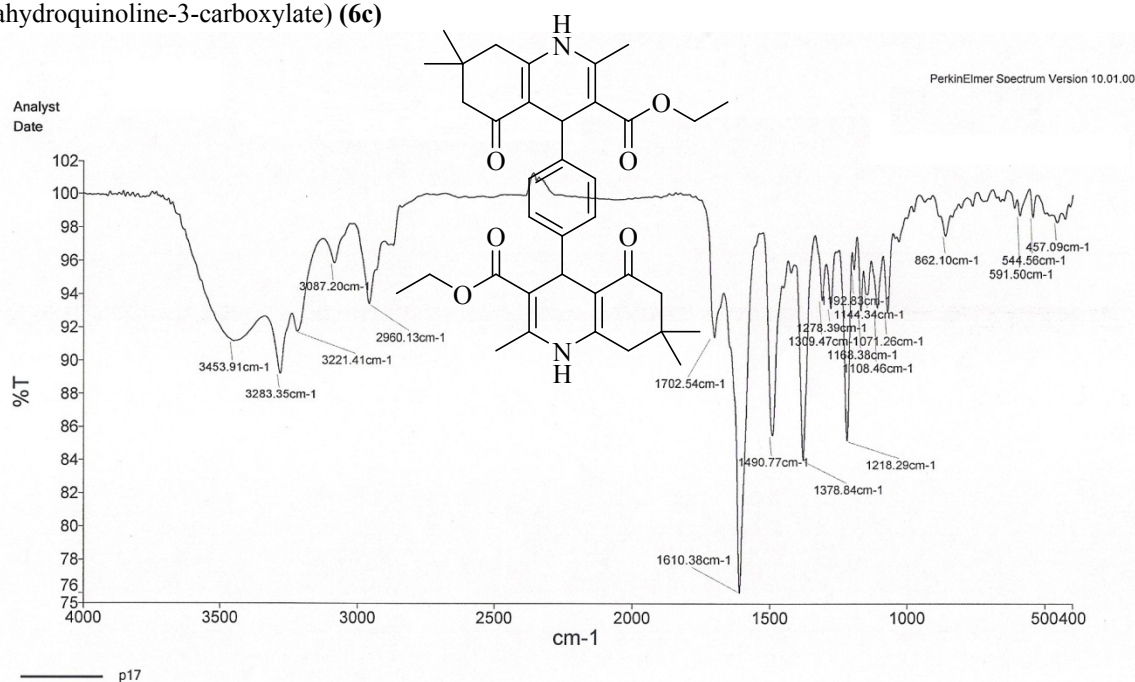

**Fig. S70.** The  $^1\text{H}$  NMR spectrum of diethyl 4,4'-(1,4-phenylene)bis(2,7,7-trimethyl-5-oxo-1,4,5,6,7,8-hexahydroquinoline-3-carboxylate) (**6c**)

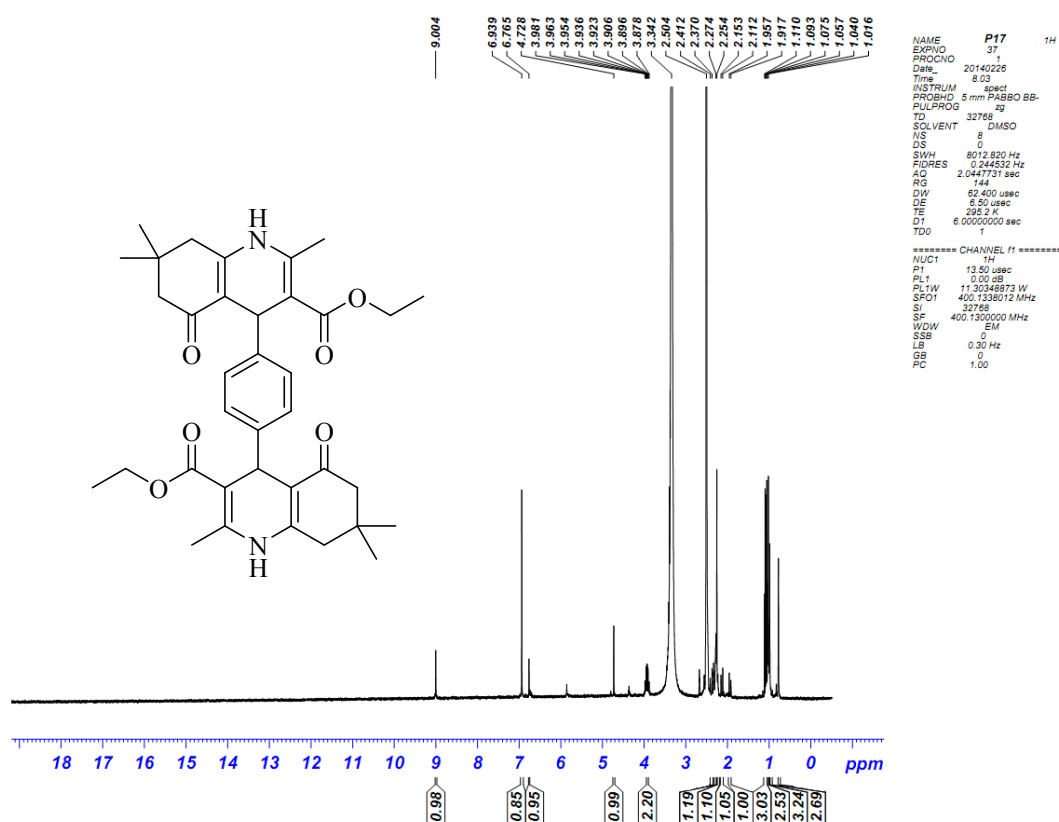

**Fig. S71.** The  $^1\text{H}$  NMR spectrum of diethyl 4,4'-(1,4-phenylene)bis(2,7,7-trimethyl-5-oxo-1,4,5,6,7,8-hexahydroquinoline-3-carboxylate) (**6c**)

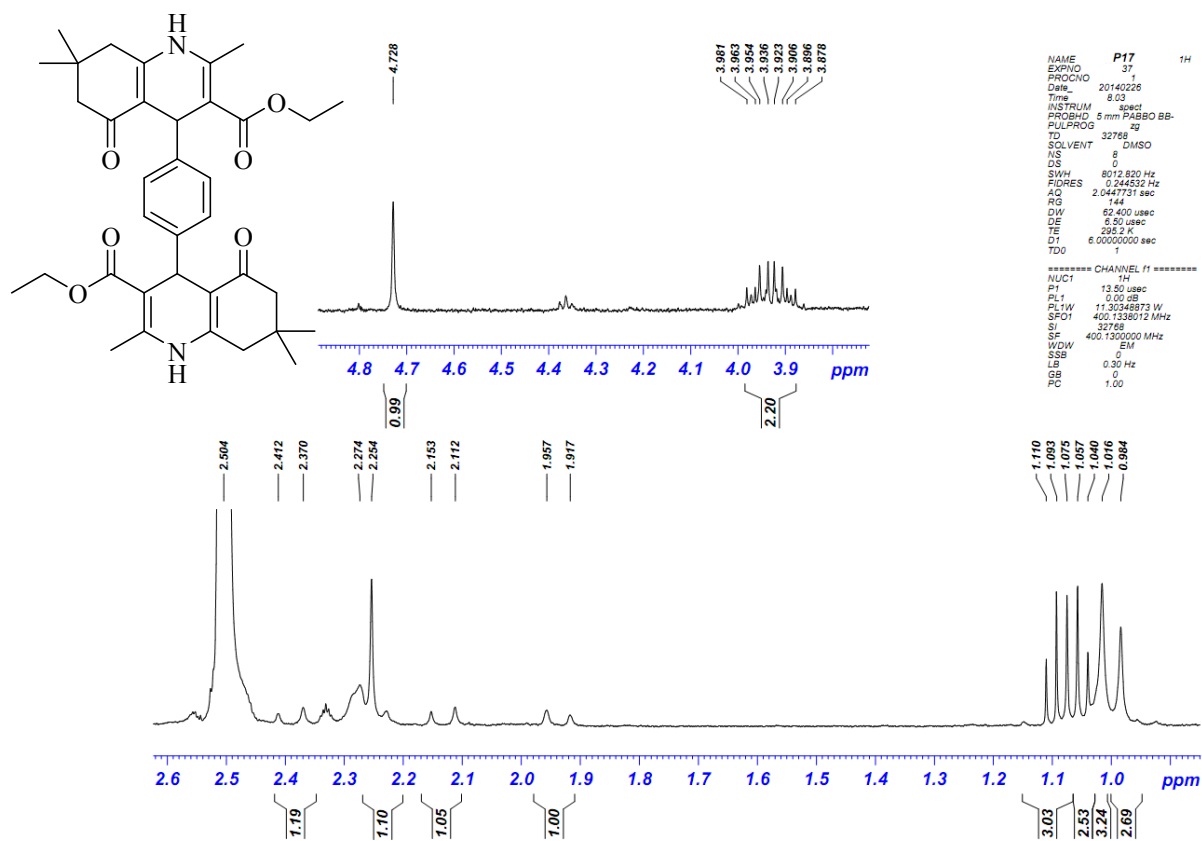

**Fig. S72.** The  $^{13}\text{C}$  NMR spectrum of diethyl 4,4'-(1,4-phenylene)bis(2,7,7-trimethyl-5-oxo-1,4,5,6,7,8-hexahydroquinoline-3-carboxylate) (**6c**)

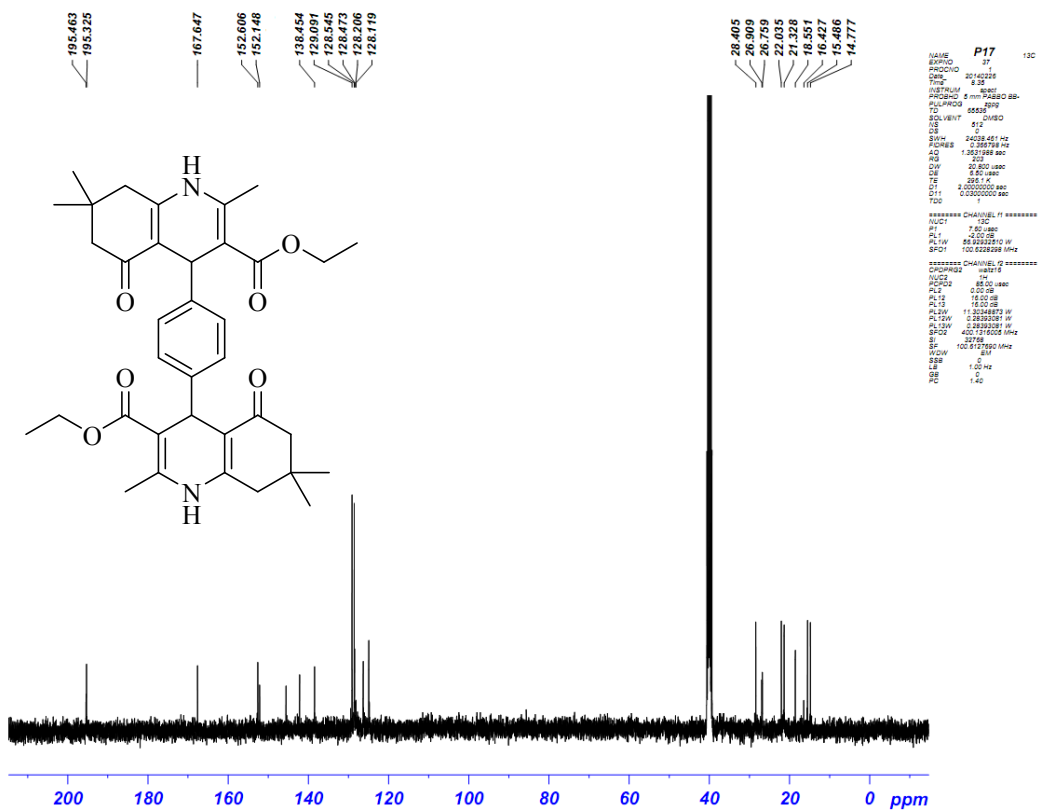

**Fig. S73.** The  $^{13}\text{C}$  NMR spectrum of diethyl 4,4'-(1,4-phenylene)bis(2,7,7-trimethyl-5-oxo-1,4,5,6,7,8-hexahydroquinoline-3-carboxylate) (**6c**)

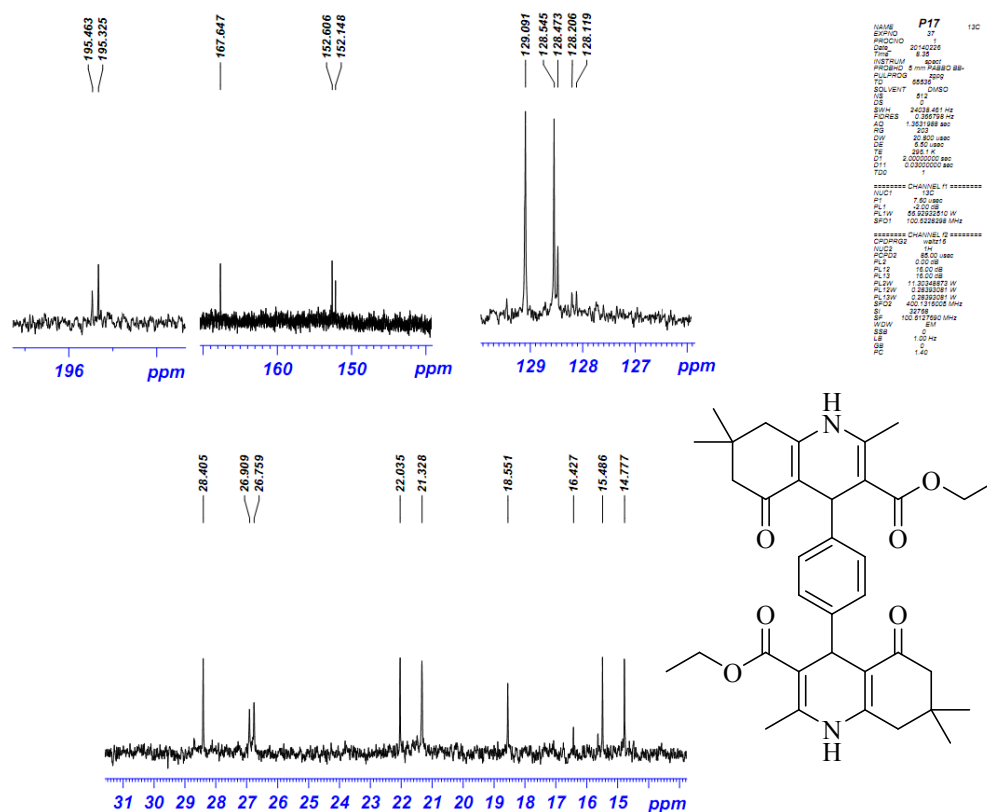

**Fig. S74.** The Mass spectrum of diethyl 4,4'-(1,4-phenylene)bis(2,7,7-trimethyl-5-oxo-1,4,5,6,7,8-hexahydroquinoline-3-carboxylate) (**6c**)

Abundance

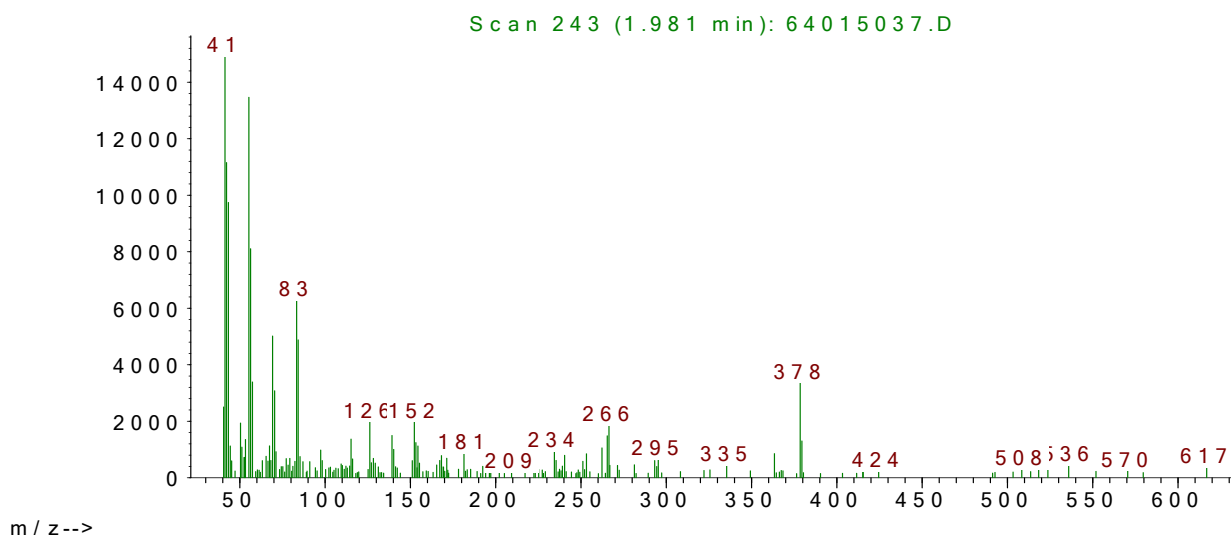

**Fig. S75.** The IR spectrum of ethyl 4-(2,5-dimethoxyphenyl)-2,7,7-trimethyl-5-oxo-1,4,5,6,7,8-hexahydroquinoline-3-carboxylate (**6d**)

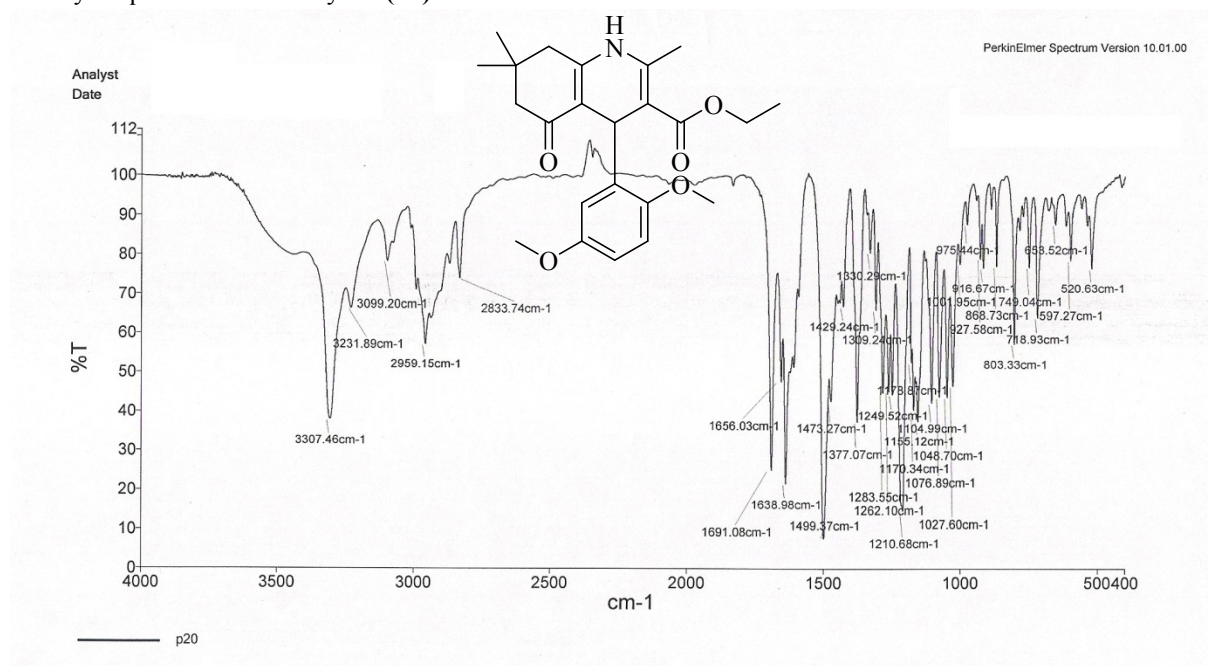

**Fig. S76.** The <sup>1</sup>H NMR spectrum of ethyl 4-(2,5-dimethoxyphenyl)-2,7,7-trimethyl-5-oxo-1,4,5,6,7,8-hexahydroquinoline-3-carboxylate (**6d**)

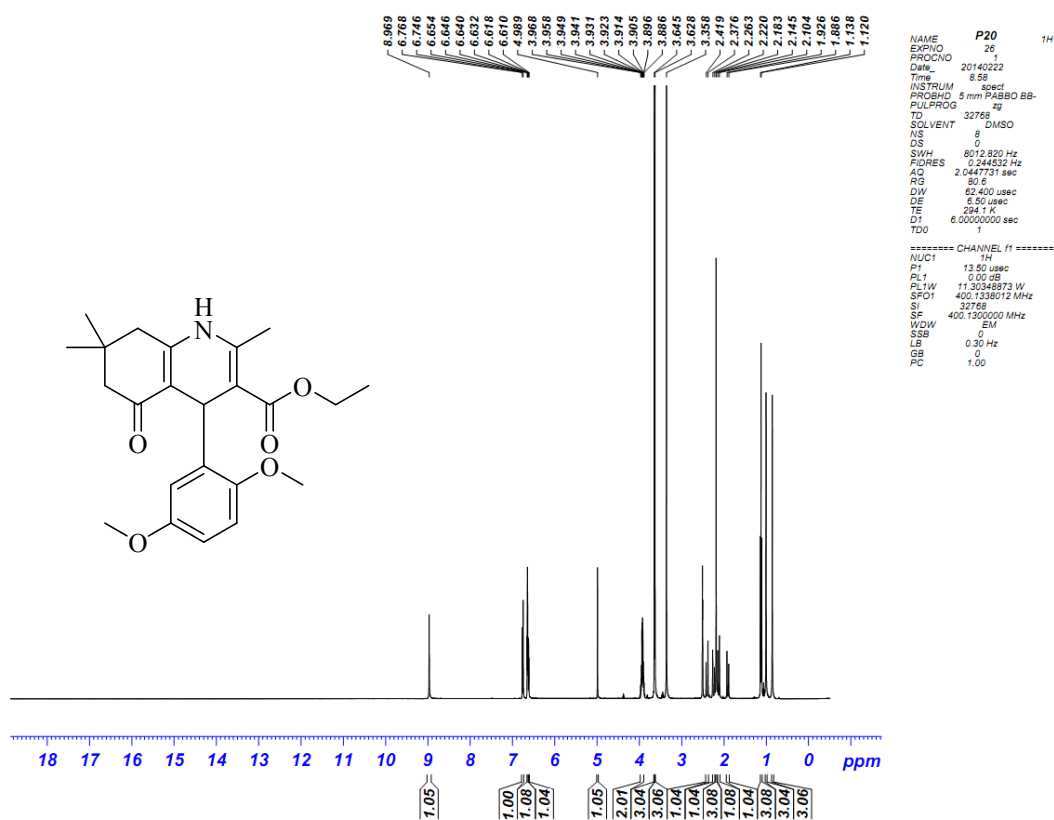

**Fig. S77.** The  $^1\text{H}$  NMR spectrum of ethyl 4-(2,5-dimethoxyphenyl)-2,7,7-trimethyl-5-oxo-1,4,5,6,7,8-hexahydroquinoline-3-carboxylate (**6d**)

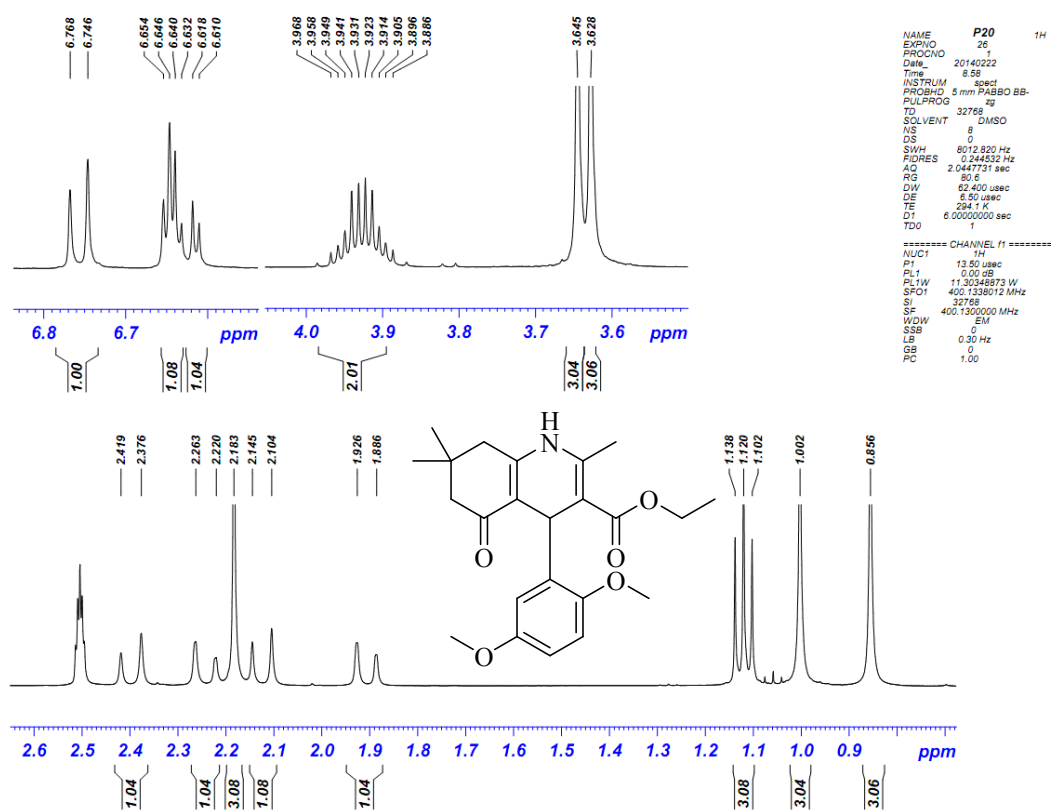

**Fig. S78.** The  $^{13}\text{C}$  NMR spectrum of ethyl 4-(2,5-dimethoxyphenyl)-2,7,7-trimethyl-5-oxo-1,4,5,6,7,8-hexahydroquinoline-3-carboxylate (**6d**)

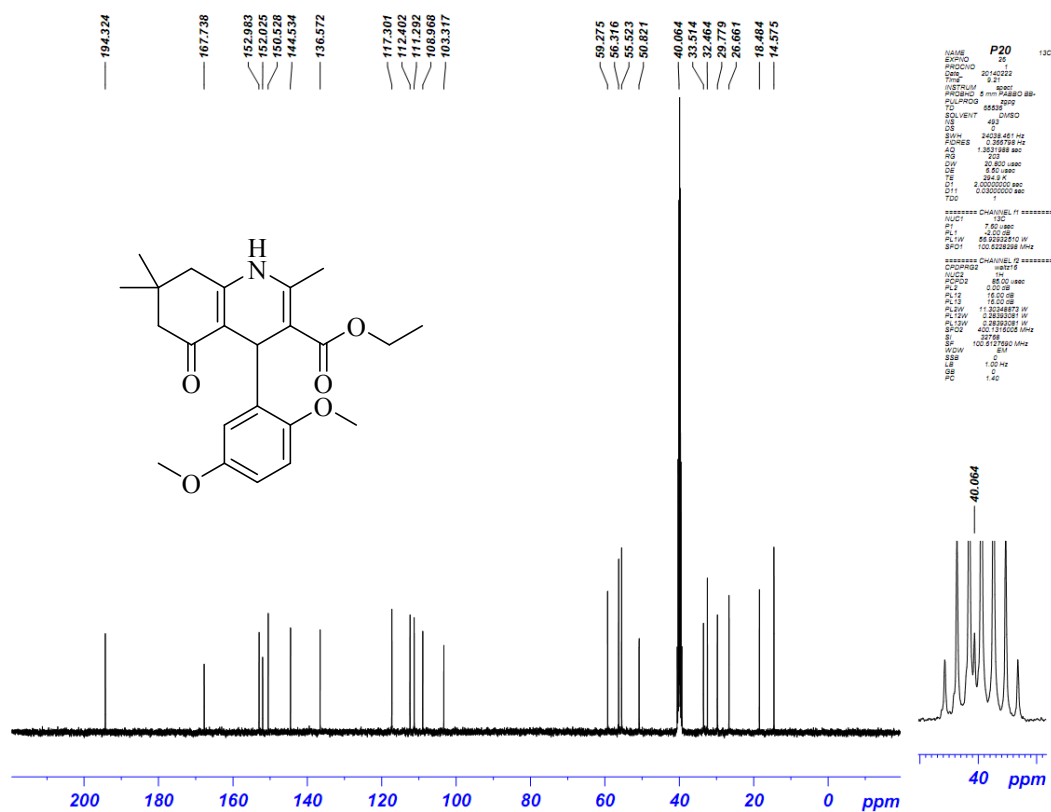

**Fig. S79.** The Mass spectrum of ethyl 4-(2,5-dimethoxyphenyl)-2,7,7-trimethyl-5-oxo-1,4,5,6,7,8-hexahydroquinoline-3-carboxylate (**6d**)

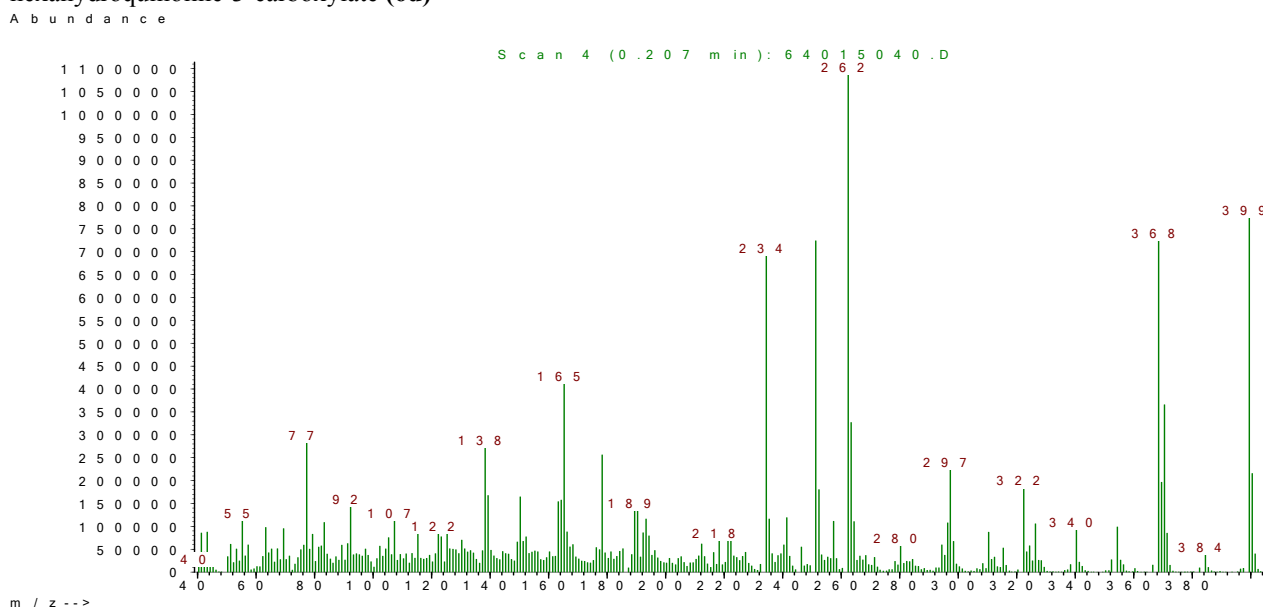



**Fig. S80.** The IR spectrum of ethyl 2,7,7-trimethyl-5-oxo-4-(1-phenylprop-1-en-2-yl)-1,4,5,6,7,8-hexahydroquinoline-3-carboxylate (**6e**)

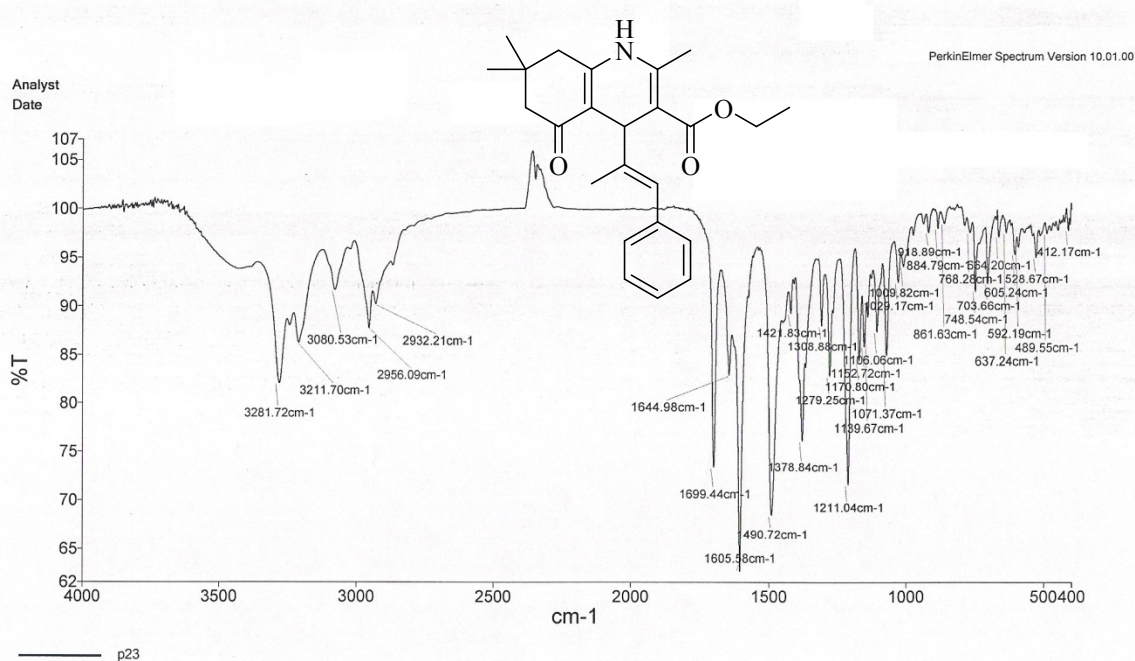

**Fig. S81.** The  $^1\text{H}$  NMR spectrum of ethyl 2,7,7-trimethyl-5-oxo-4-(1-phenylprop-1-en-2-yl)-1,4,5,6,7,8-hexahydroquinoline-3-carboxylate (**6e**)

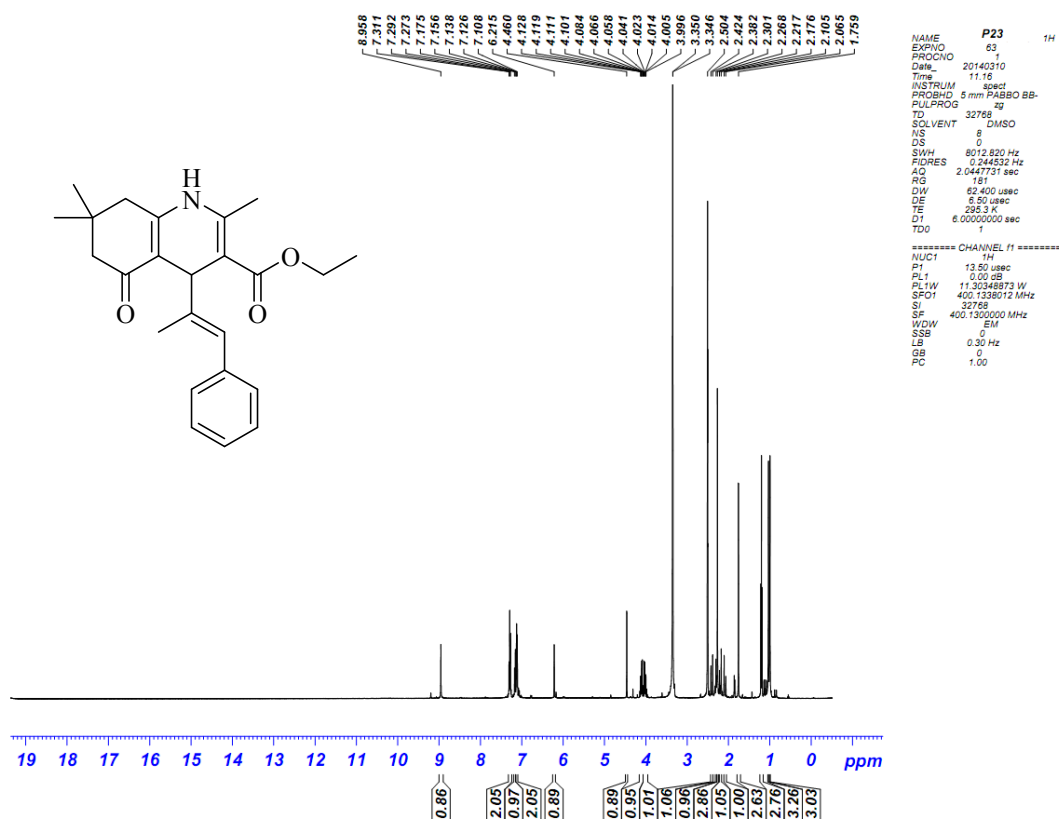

**Fig. S82.** The  $^1\text{H}$  NMR spectrum of ethyl 2,7,7-trimethyl-5-oxo-4-(1-phenylprop-1-en-2-yl)-1,4,5,6,7,8-hexahydroquinoline-3-carboxylate (**6e**)

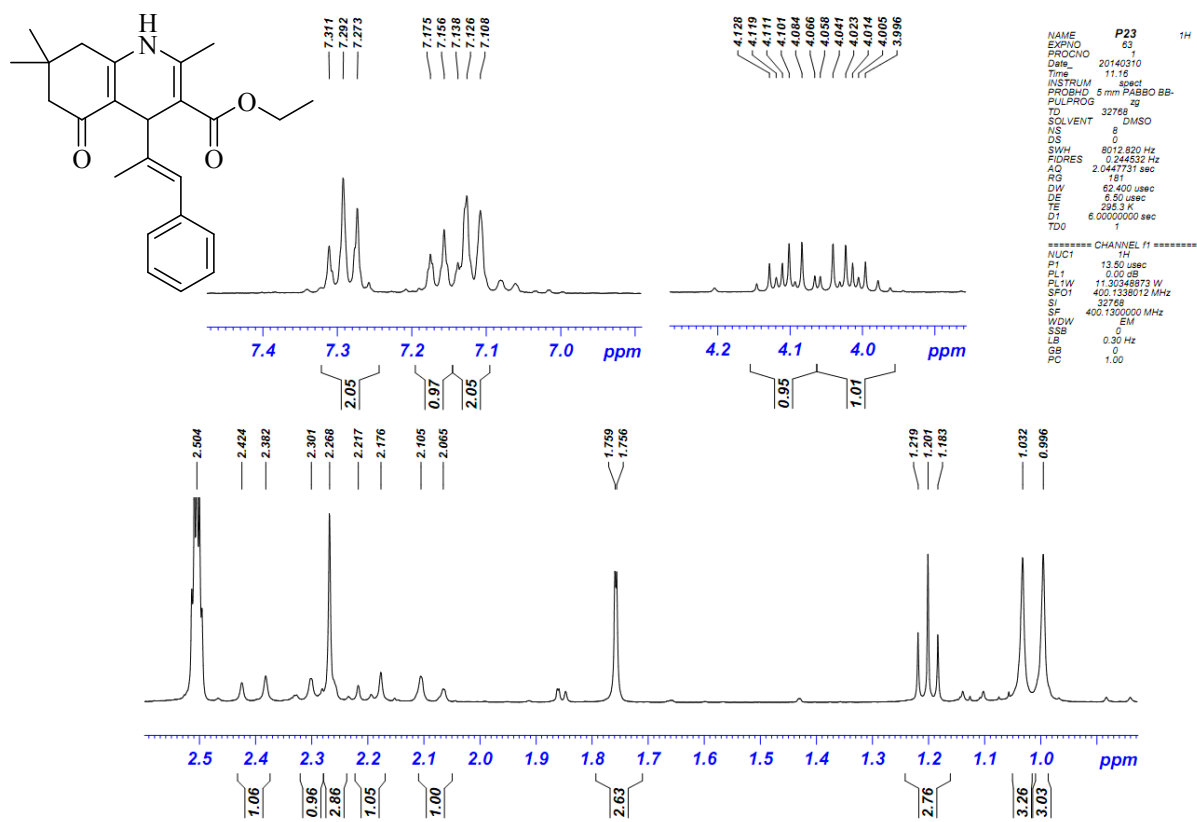

**Fig. S83.** The  $^{13}\text{C}$  NMR spectrum of ethyl 2,7,7-trimethyl-5-oxo-4-(1-phenylprop-1-en-2-yl)-1,4,5,6,7,8-hexahydroquinoline-3-carboxylate (**6e**)

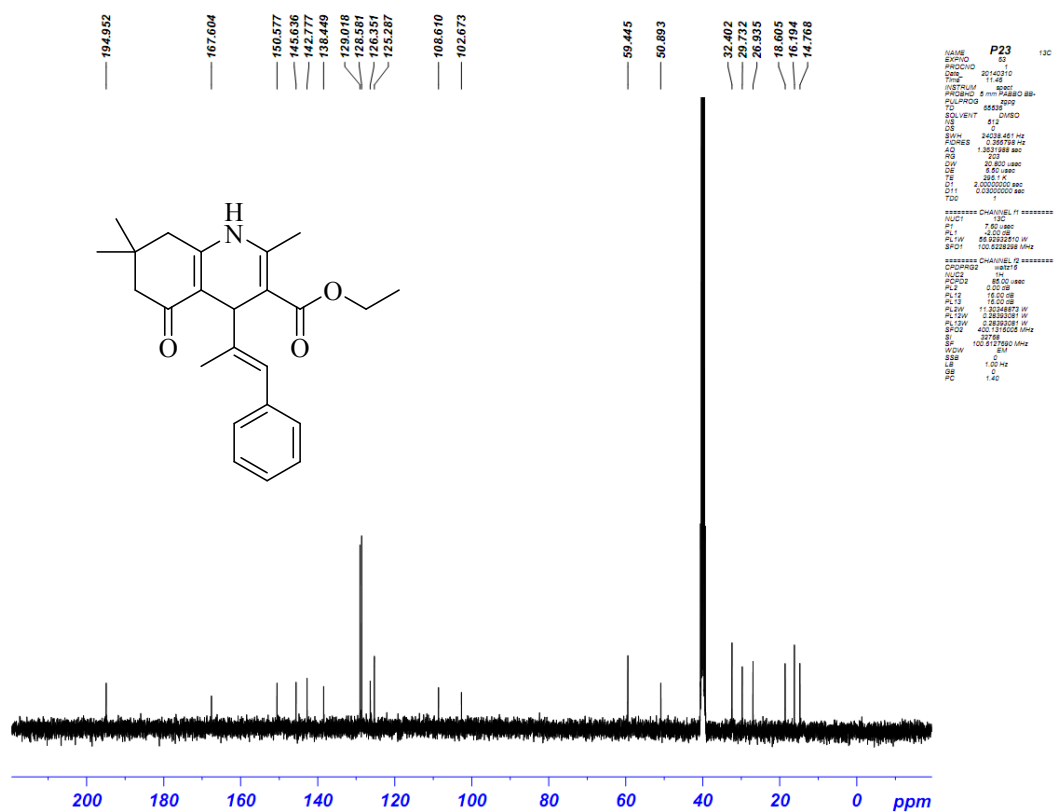

**Fig. S84.** The  $^{13}\text{C}$  NMR spectrum of ethyl 2,7,7-trimethyl-5-oxo-4-(1-phenylprop-1-en-2-yl)-1,4,5,6,7,8-hexahydroquinoline-3-carboxylate (**6e**)

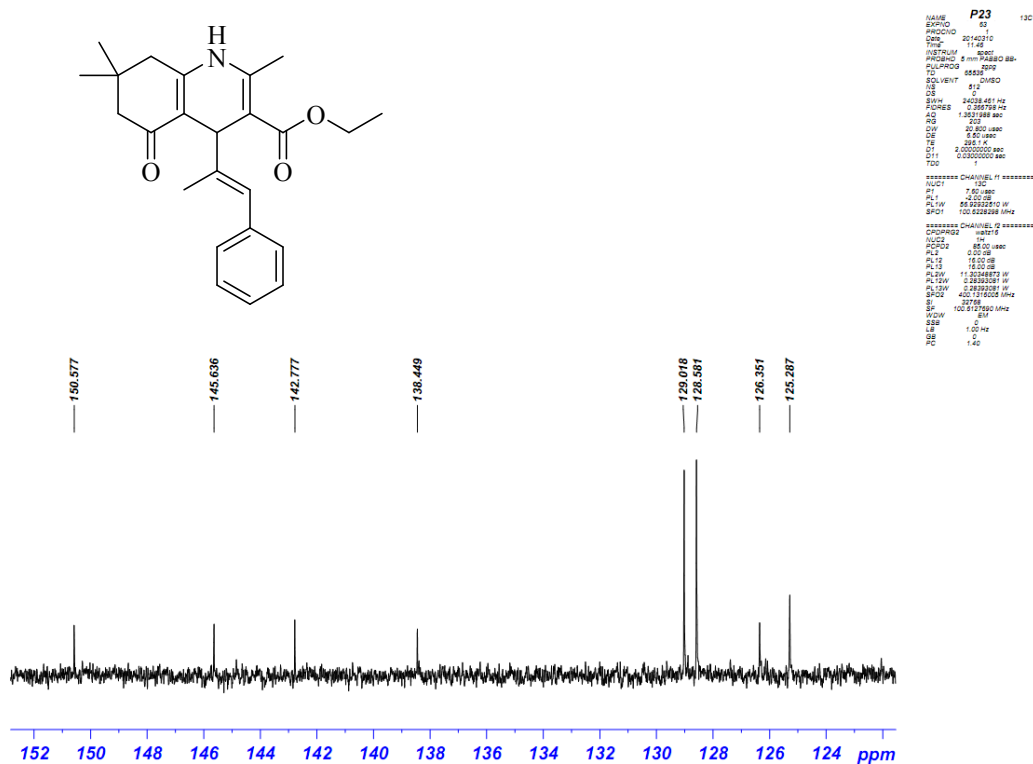

**Fig. S85.** The Mass spectrum of ethyl 2,7,7-trimethyl-5-oxo-4-(1-phenylprop-1-en-2-yl)-1,4,5,6,7,8-hexahydroquinoline-3-carboxylate (**6e**)

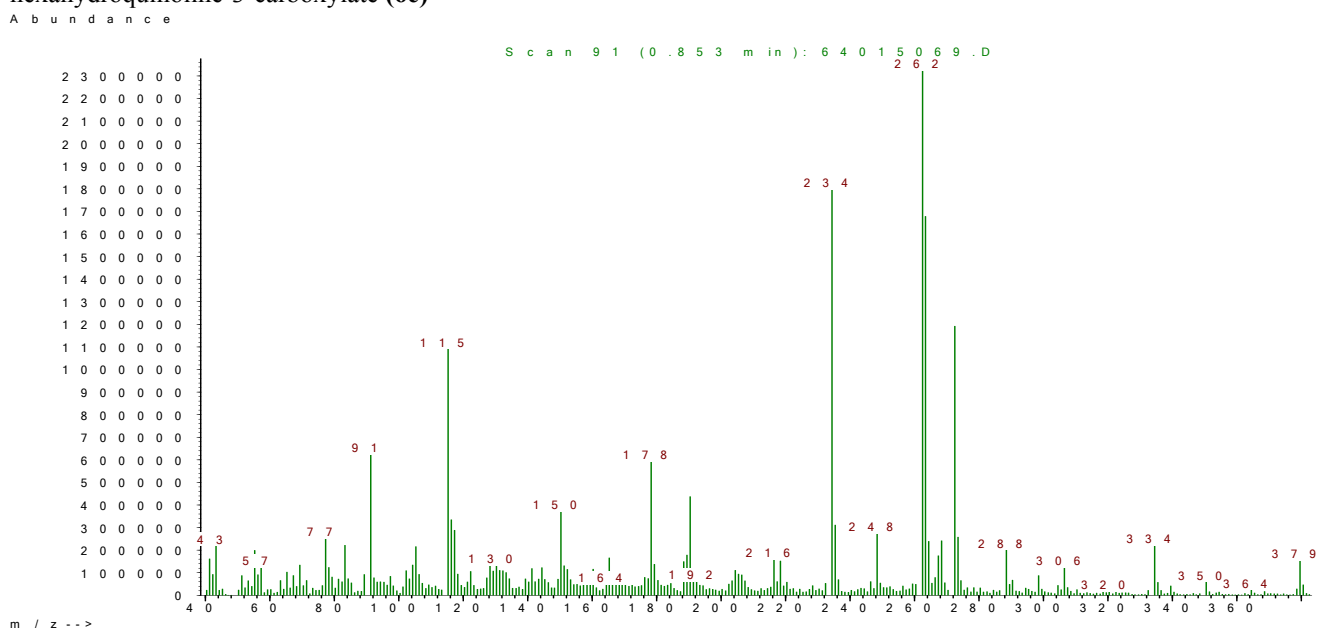

**Fig. S86.** The IR spectrum of ethyl 2-amino-4-(2,4-dinitrophenyl)-5-oxo-1,4,5,6,7,8-hexahydroquinoline-3-carboxylate (**7a**)

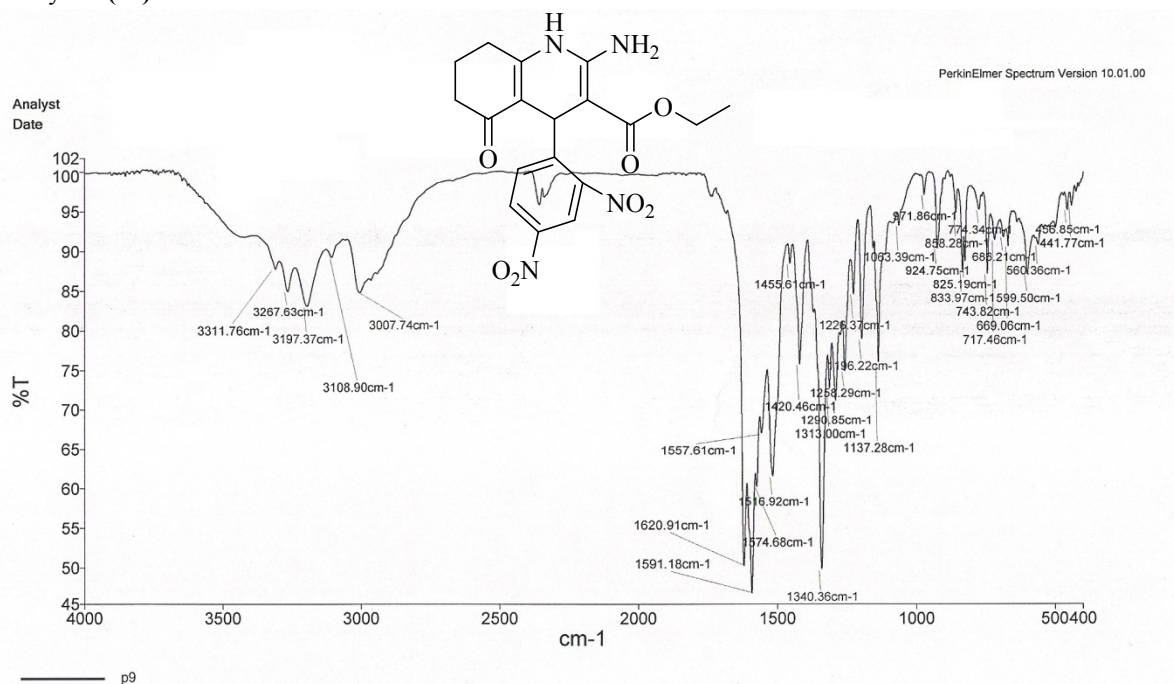

**Fig. S87.** The  $^1\text{H}$  NMR spectrum of ethyl 2-amino-4-(2,4-dinitrophenyl)-5-oxo-1,4,5,6,7,8-hexahydroquinoline-3-carboxylate (**7a**)

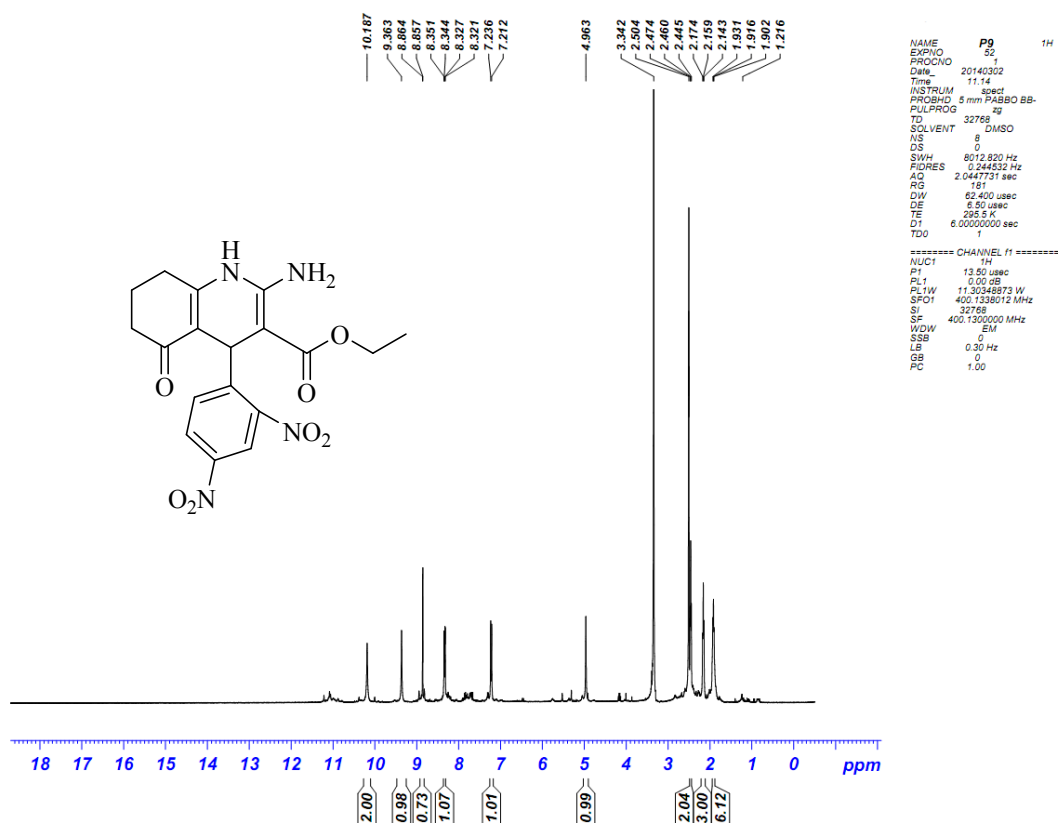

**Fig. S88.** The  $^1\text{H}$  NMR spectrum of ethyl 2-amino-4-(2,4-dinitrophenyl)-5-oxo-1,4,5,6,7,8-hexahydroquinoline-3-carboxylate (**7a**)

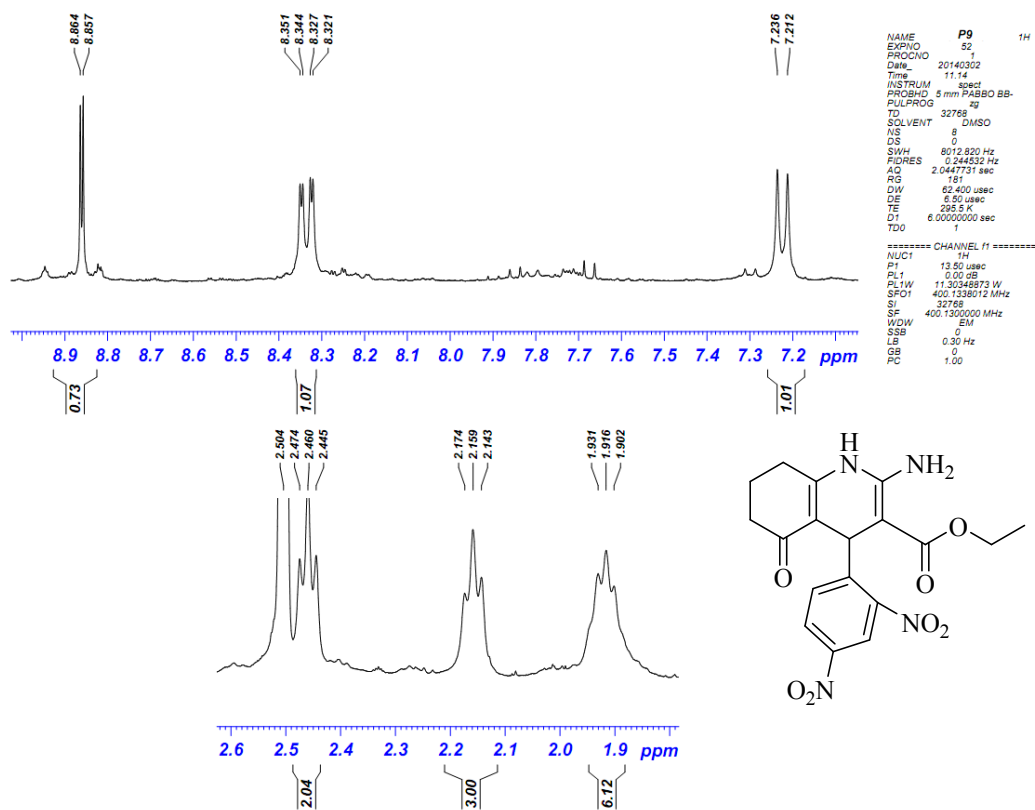

**Fig. S89.** The  $^{13}\text{C}$  NMR spectrum of ethyl 2-amino-4-(2,4-dinitrophenyl)-5-oxo-1,4,5,6,7,8-hexahydroquinoline-3-carboxylate (**7a**)

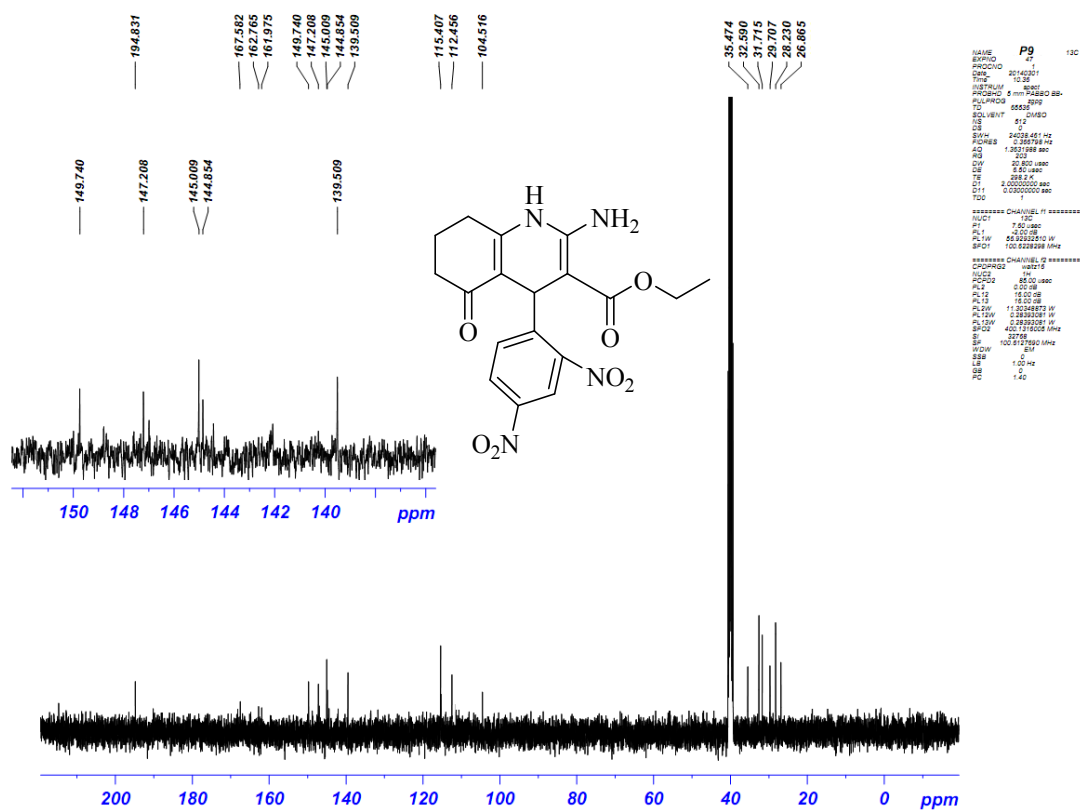

**Fig. S90.** The Mass spectrum of ethyl 2-amino-4-(2,4-dinitrophenyl)-5-oxo-1,4,5,6,7,8-hexahydroquinoline-3-carboxylate (**7a**)

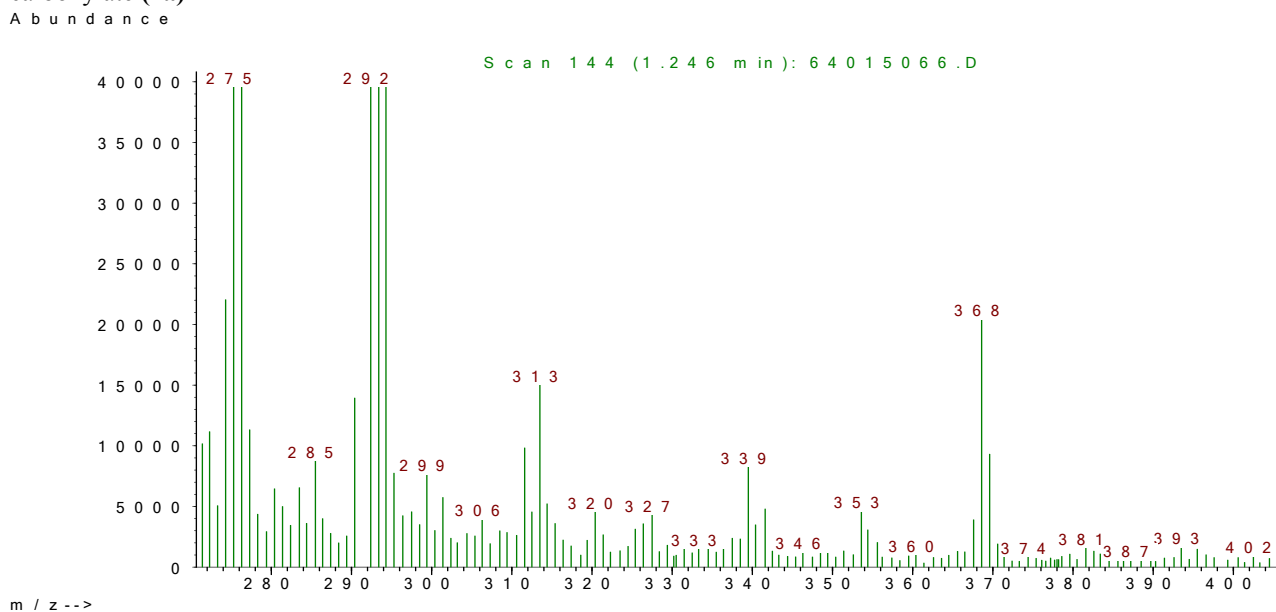

**Fig. S91.** The IR spectrum of ethyl 2-amino-4-(4-hydroxy-3-methoxyphenyl)-5-oxo-1,4,5,6,7,8-hexahydroquinoline-3-carboxylate (**7b**)

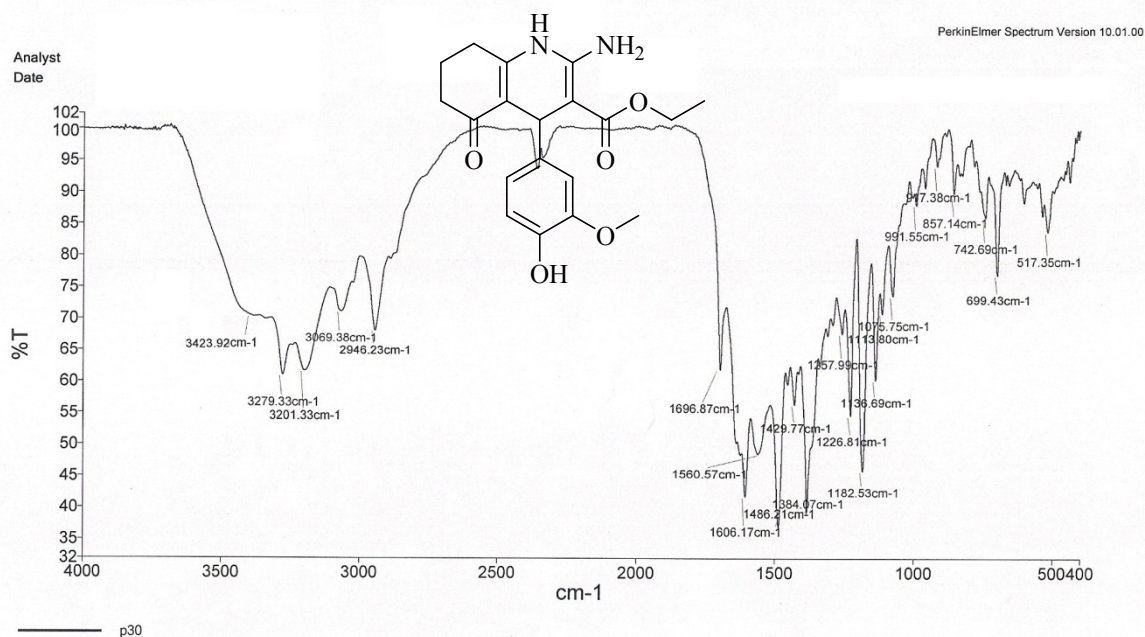

**Fig. S92.** The  $^1\text{H}$  NMR spectrum of ethyl 2-amino-4-(4-hydroxy-3-methoxyphenyl)-5-oxo-1,4,5,6,7,8-hexahydroquinoline-3-carboxylate (**7b**)

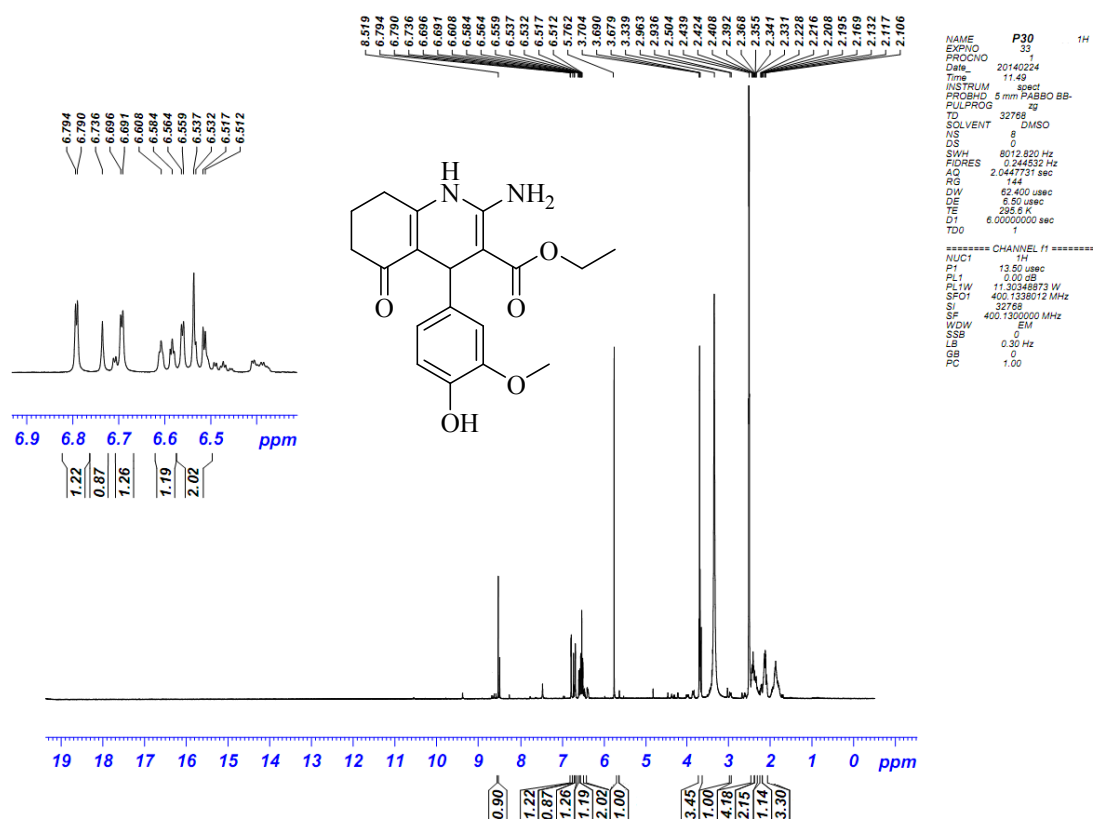



**Fig. S93.** The  $^{13}\text{C}$  NMR spectrum of ethyl 2-amino-4-(4-hydroxy-3-methoxyphenyl)-5-oxo-1,4,5,6,7,8-hexahydroquinoline-3-carboxylate (**7b**)

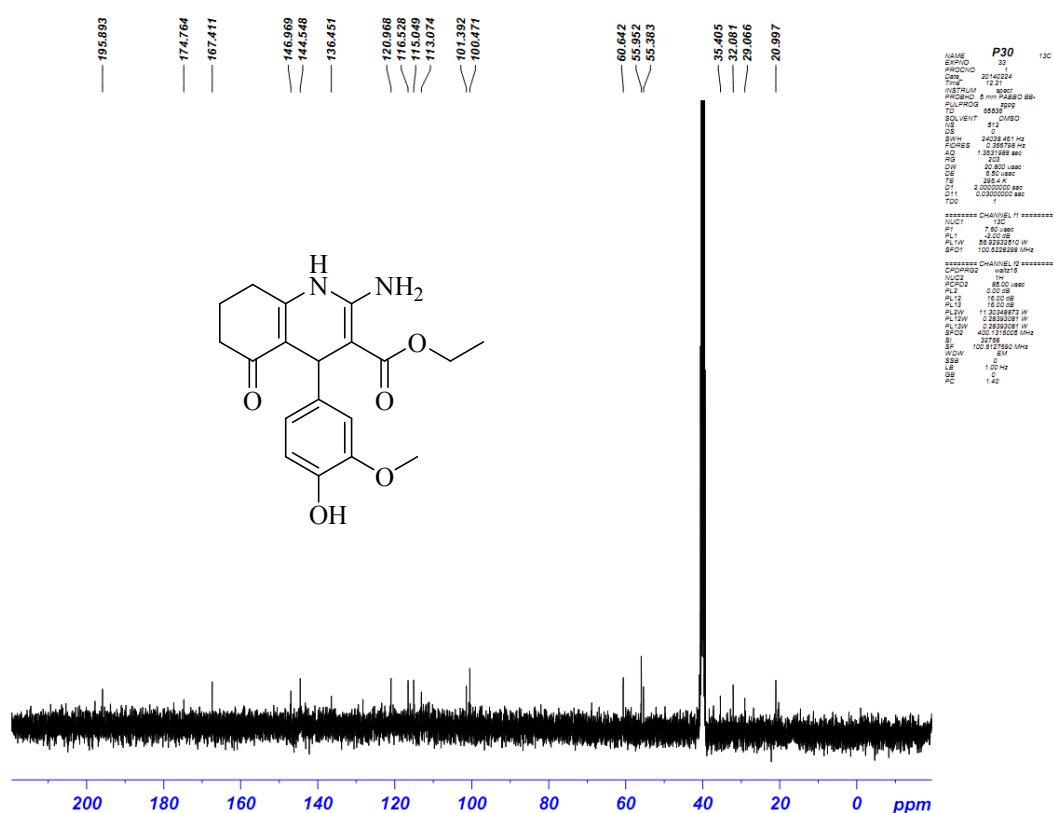

**Fig. S94.** The Mass spectrum of ethyl 2-amino-4-(4-hydroxy-3-methoxyphenyl)-5-oxo-1,4,5,6,7,8-hexahydroquinoline-3-carboxylate (**7b**)

Abundance

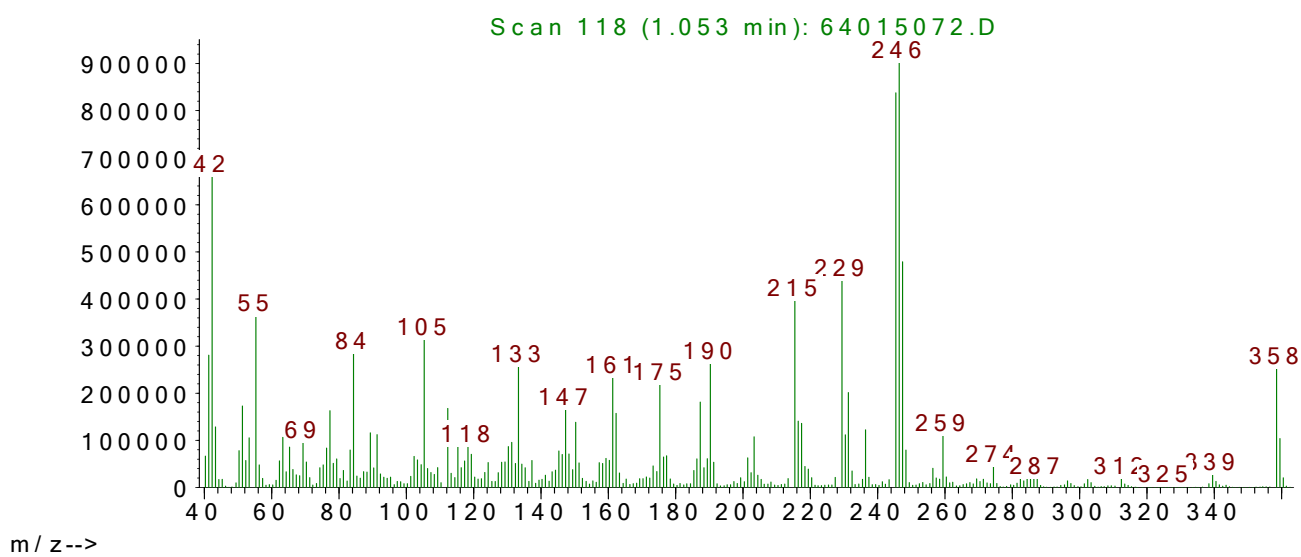

**Fig. S95.** The IR spectrum of ethyl 2-amino-4-(4-(dimethylamino)phenyl)-5-oxo-1,4,5,6,7,8-hexahydroquinoline-3-carboxylate (**7c**)

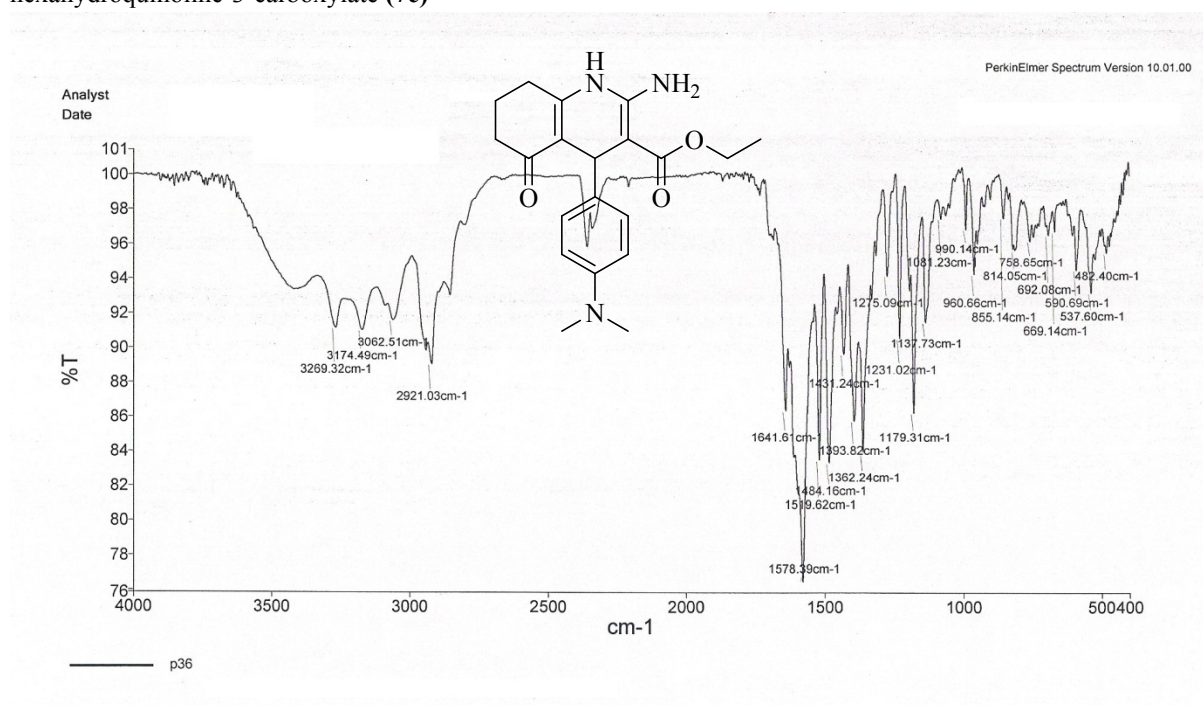

**Fig. S96.** The <sup>1</sup>H NMR spectrum of ethyl 2-amino-4-(4-(dimethylamino)phenyl)-5-oxo-1,4,5,6,7,8-hexahydroquinoline-3-carboxylate (**7c**)

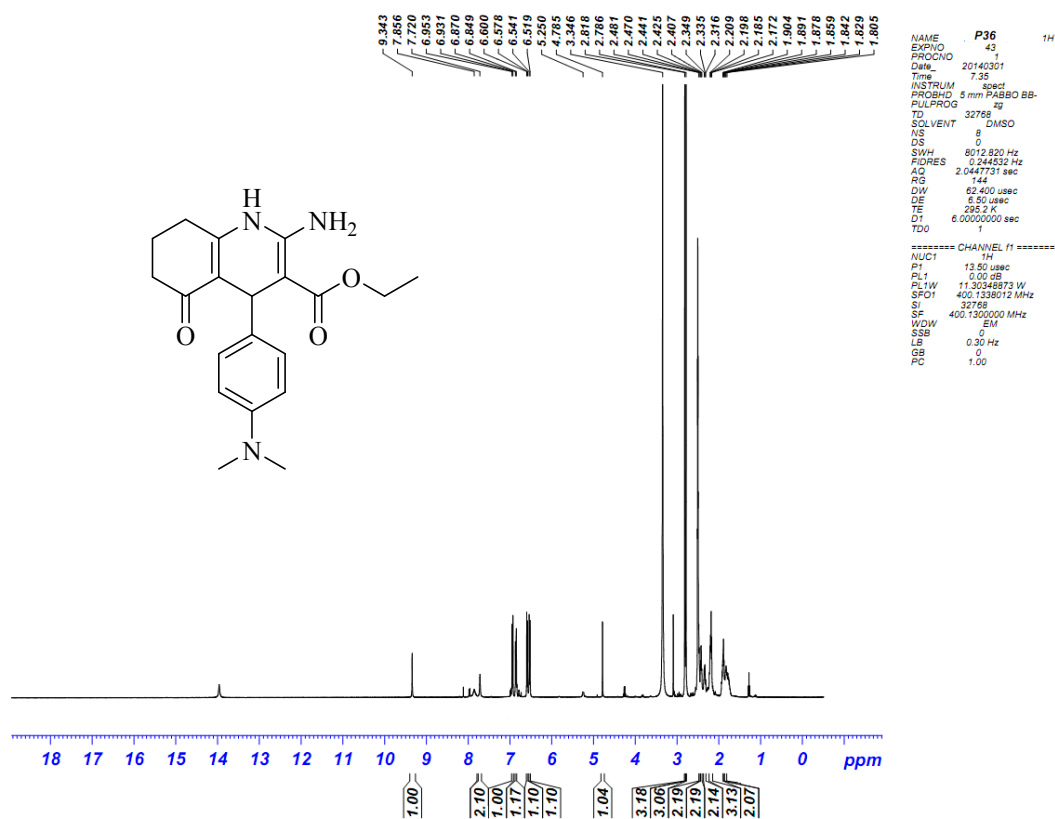

**Fig. S97.** The  $^1\text{H}$  NMR spectrum of ethyl 2-amino-4-(4-(dimethylamino)phenyl)-5-oxo-1,4,5,6,7,8-hexahydroquinoline-3-carboxylate (**7c**)

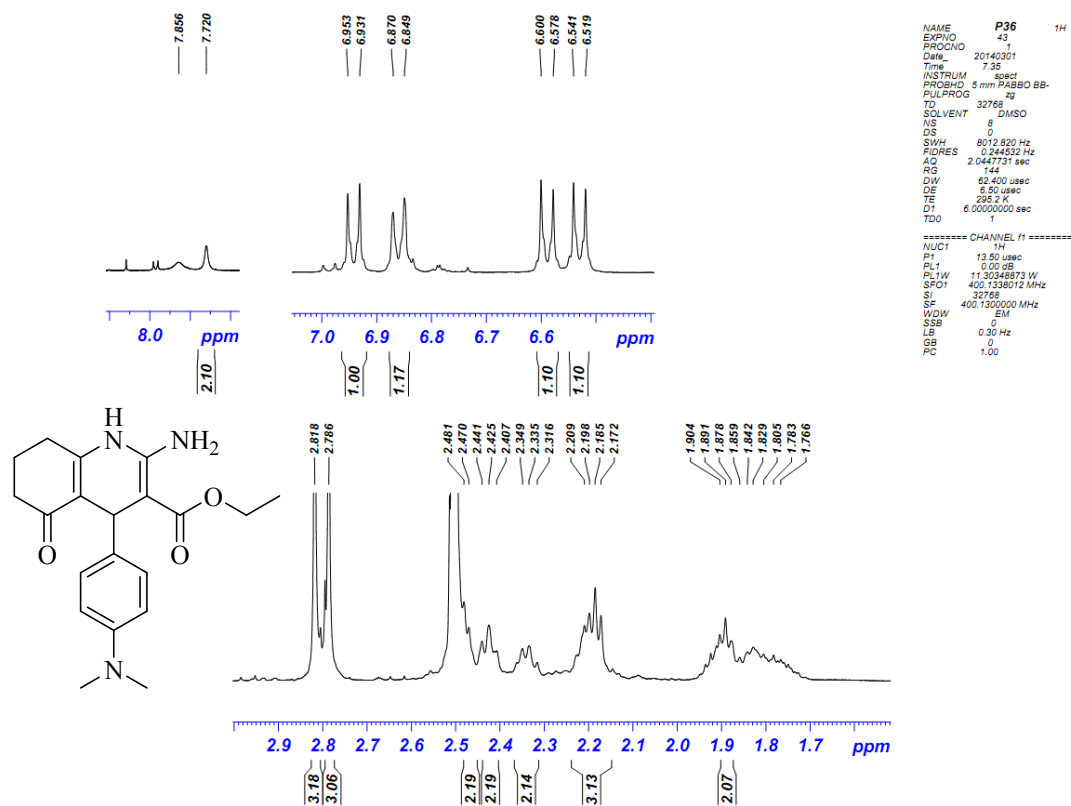

**Fig. S98.** The  $^{13}\text{C}$  NMR spectrum of ethyl 2-amino-4-(4-(dimethylamino)phenyl)-5-oxo-1,4,5,6,7,8-hexahydroquinoline-3-carboxylate (**7c**)

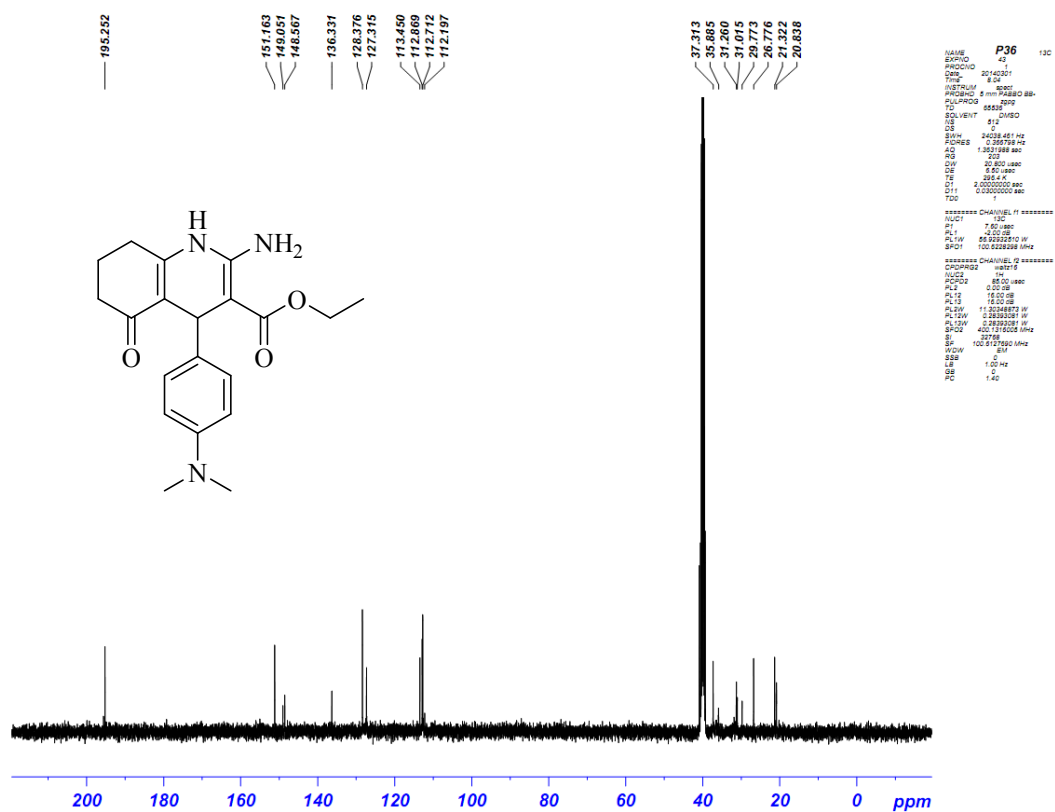

**Fig. S99.** The  $^{13}\text{C}$  NMR spectrum of ethyl 2-amino-4-(4-(dimethylamino)phenyl)-5-oxo-1,4,5,6,7,8-hexahydroquinoline-3-carboxylate (**7c**)

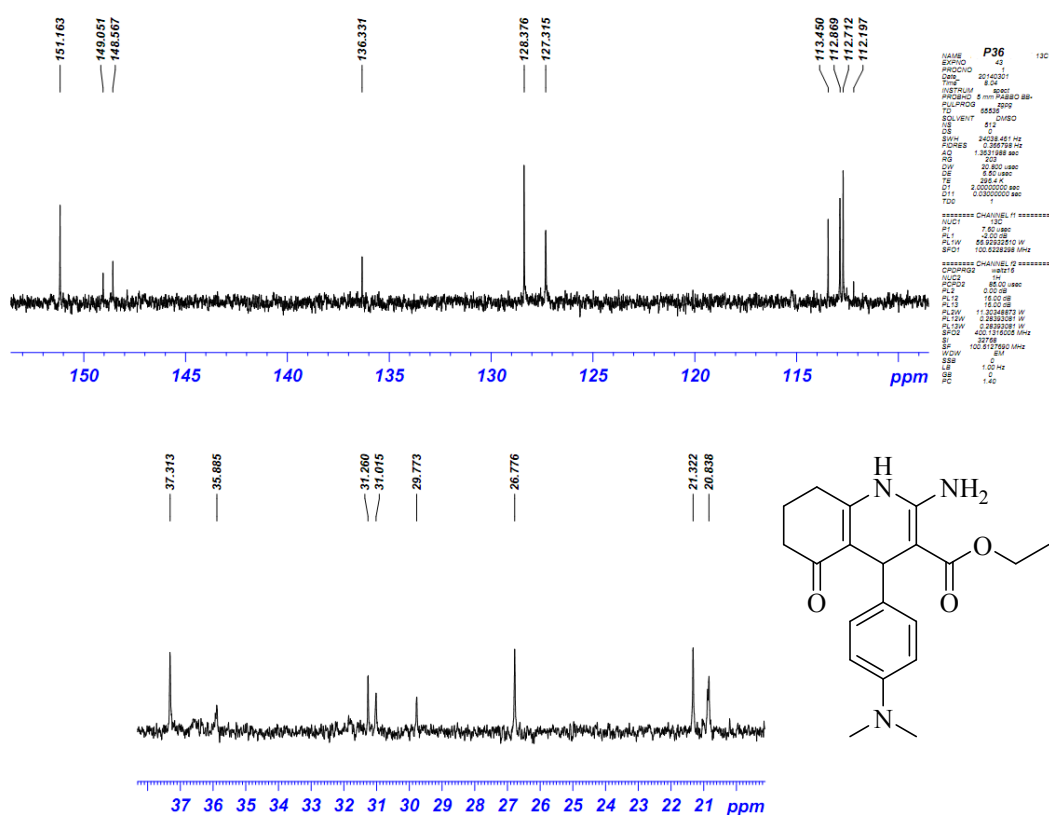

**Fig. S100.** The Mass spectrum of ethyl 2-amino-4-(4-(dimethylamino)phenyl)-5-oxo-1,4,5,6,7,8-hexahydroquinoline-3-carboxylate (**7c**)

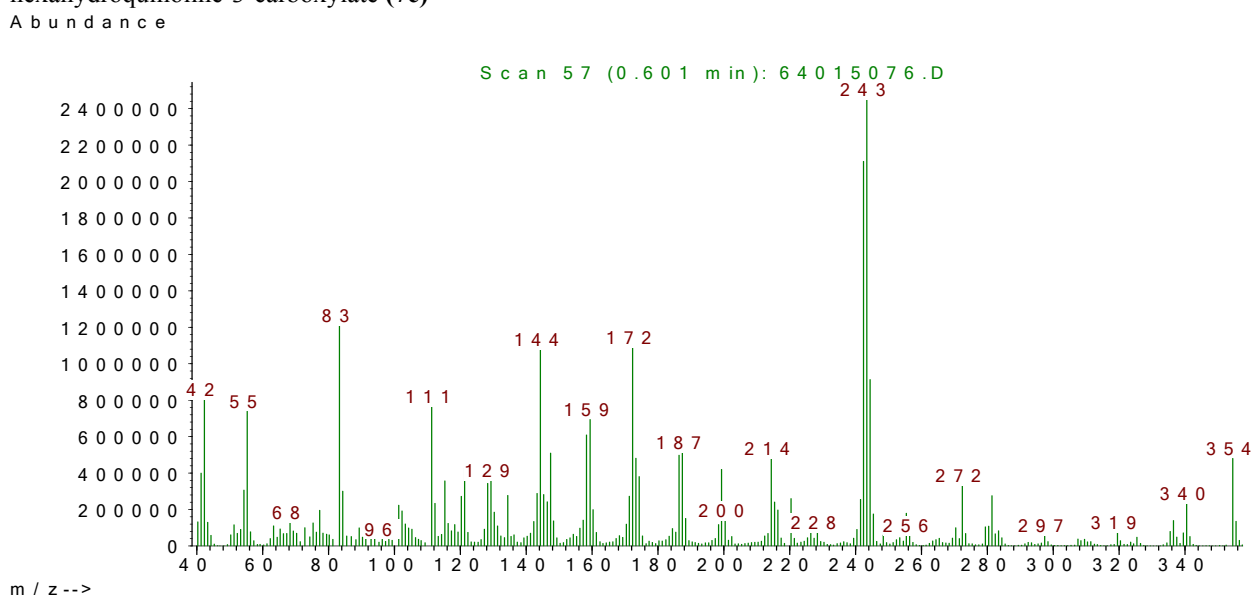

**Fig. S101.** The IR spectrum of ethyl 2-amino-4-(biphenyl-4-yl)-7,7-dimethyl-5-oxo-1,4,5,6,7,8-hexahydroquinoline-3-carboxylate (**7d**)

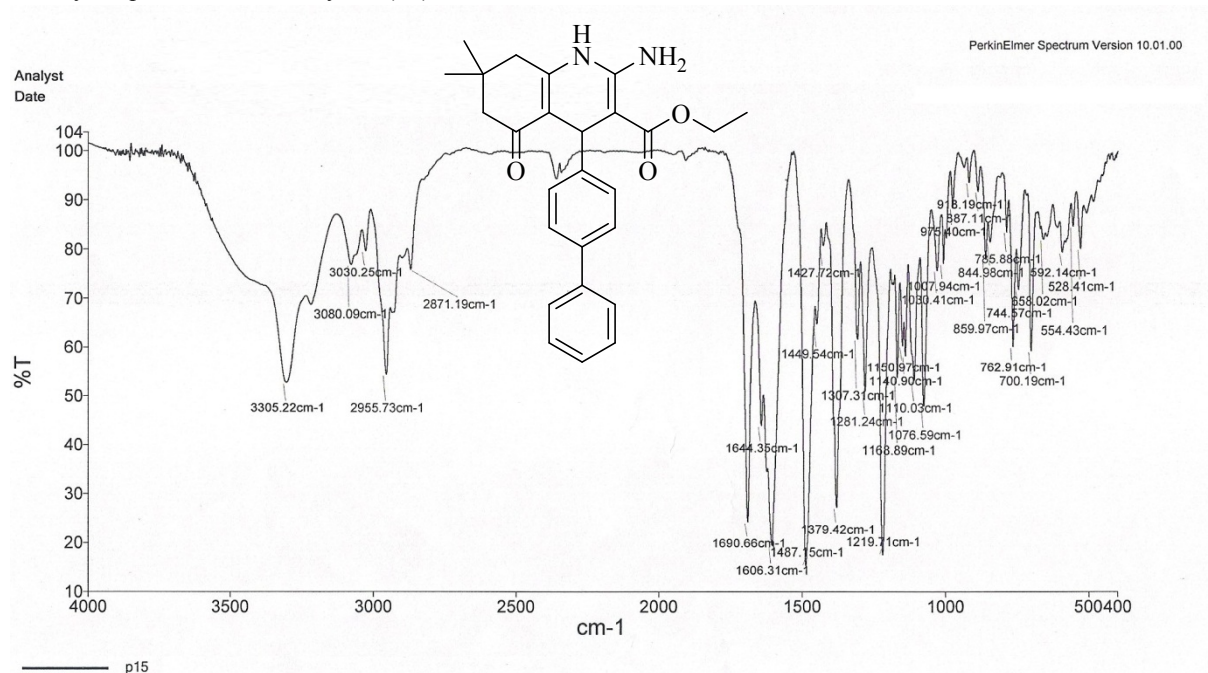

**Fig. S102.** The <sup>1</sup>H NMR spectrum of ethyl 2-amino-4-(biphenyl-4-yl)-7,7-dimethyl-5-oxo-1,4,5,6,7,8-hexahydroquinoline-3-carboxylate (**7d**)

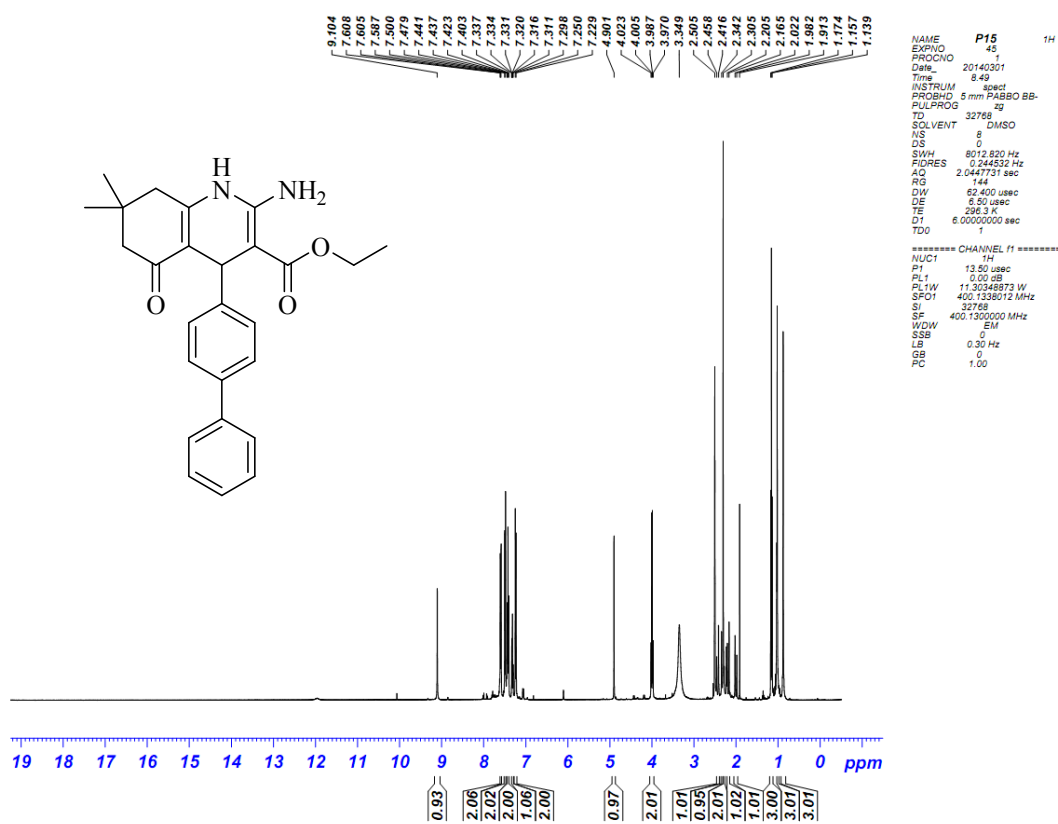

**Fig. S103.** The  $^1\text{H}$  NMR spectrum of ethyl 2-amino-4-(biphenyl-4-yl)-7,7-dimethyl-5-oxo-1,4,5,6,7,8-hexahydroquinoline-3-carboxylate (**7d**)

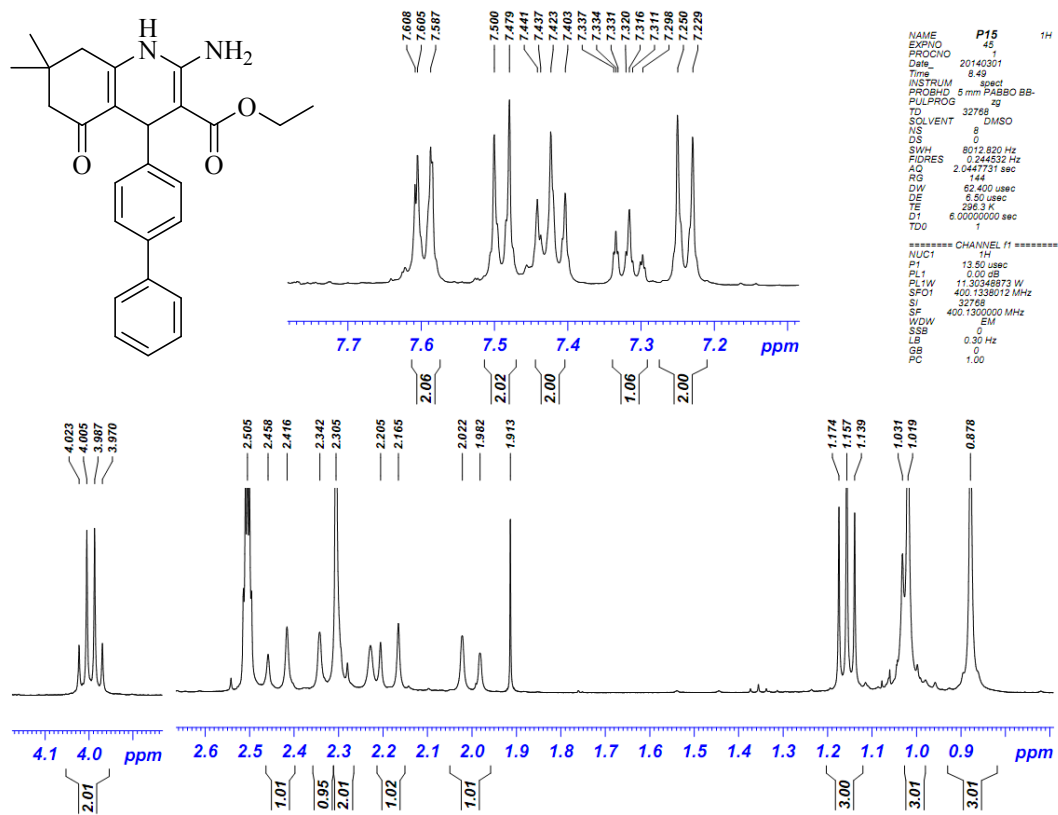

**Fig. S104.** The  $^{13}\text{C}$  NMR spectrum of ethyl 2-amino-4-(biphenyl-4-yl)-7,7-dimethyl-5-oxo-1,4,5,6,7,8-hexahydroquinoline-3-carboxylate (**7d**)

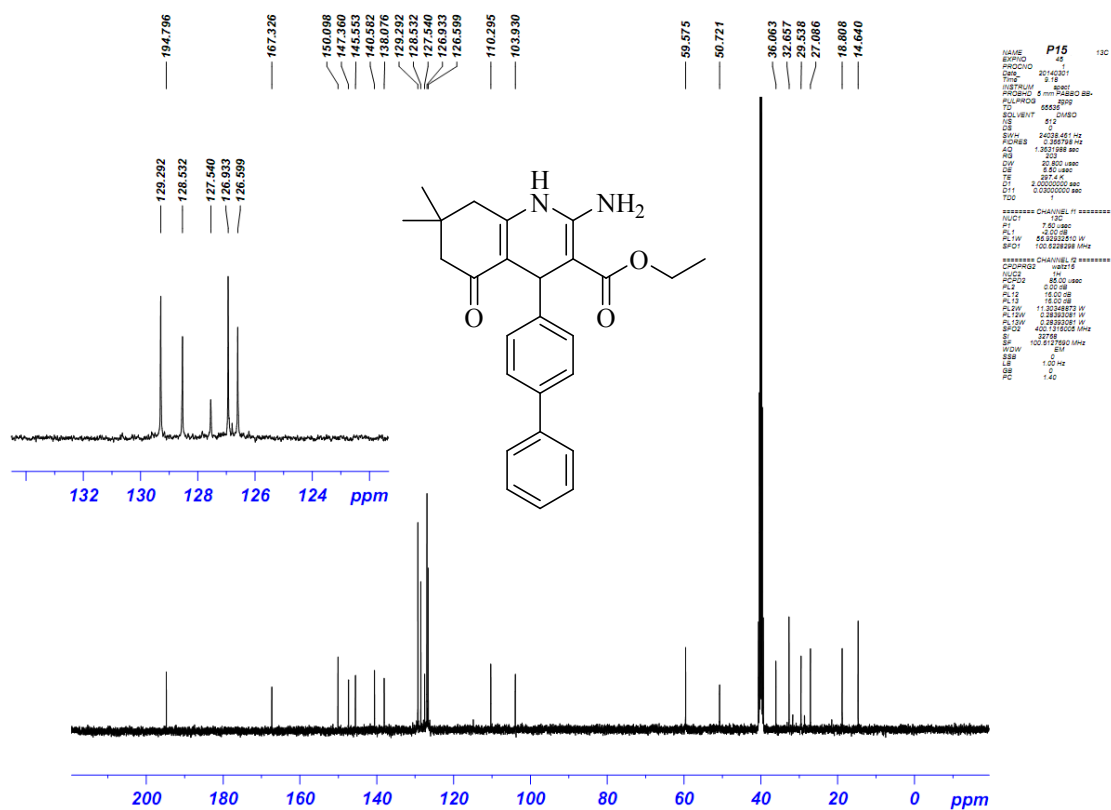

**Fig. S105.** The Mass spectrum of ethyl 2-amino-4-(biphenyl-4-yl)-7,7-dimethyl-5-oxo-1,4,5,6,7,8-hexahydroquinoline-3-carboxylate (**7d**)

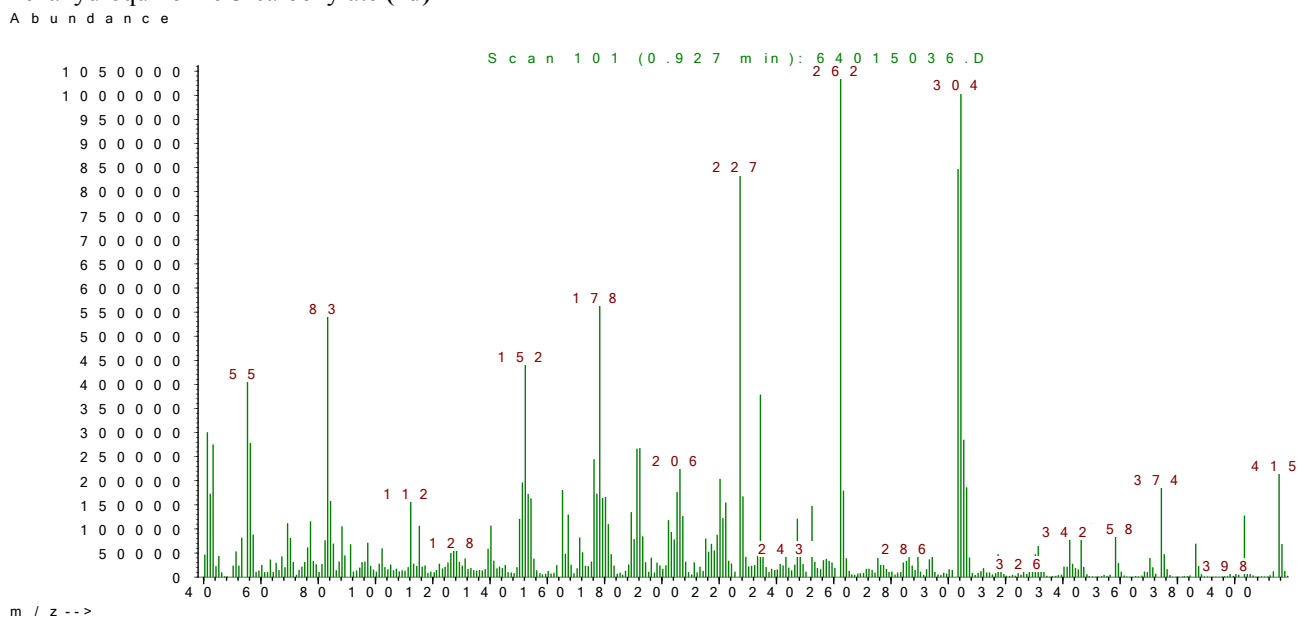



**Fig. S106.** The IR spectrum of diethyl 4,4'-(1,4-phenylene)bis(2-amino-7,7-dimethyl-5-oxo-1,4,5,6,7,8-hexahydroquinoline-3-carboxylate) (**7e**)

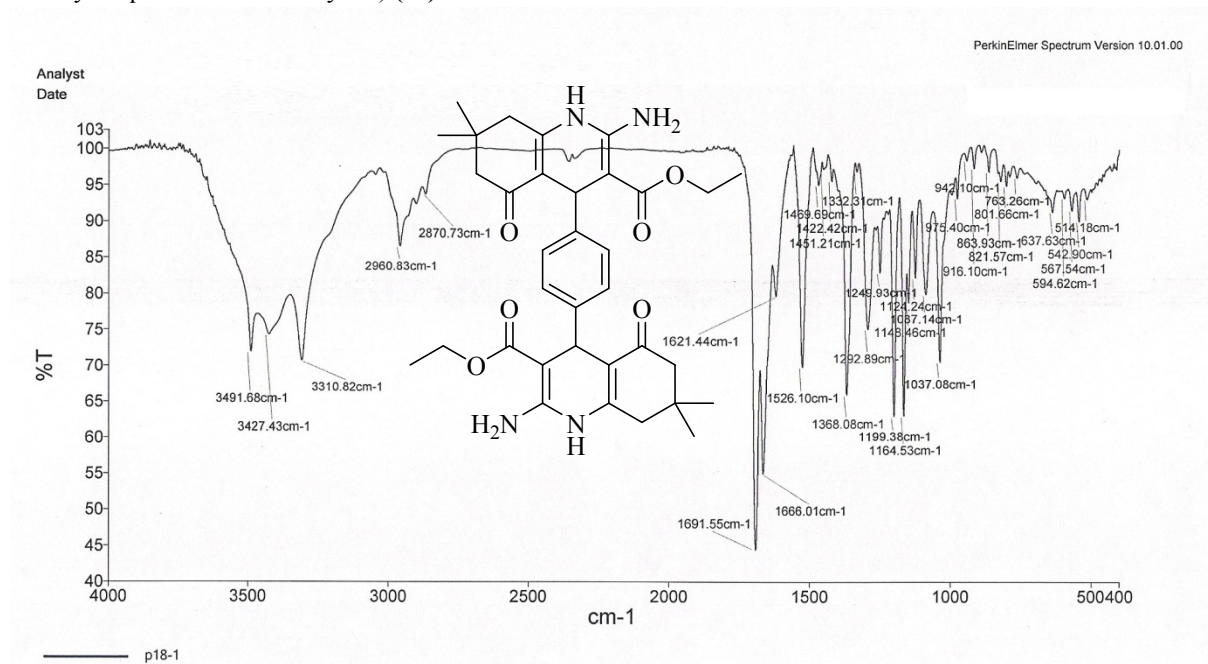

**Fig. S107.** The <sup>1</sup>H NMR spectrum of diethyl 4,4'-(1,4-phenylene)bis(2-amino-7,7-dimethyl-5-oxo-1,4,5,6,7,8-hexahydroquinoline-3-carboxylate) (**7e**)

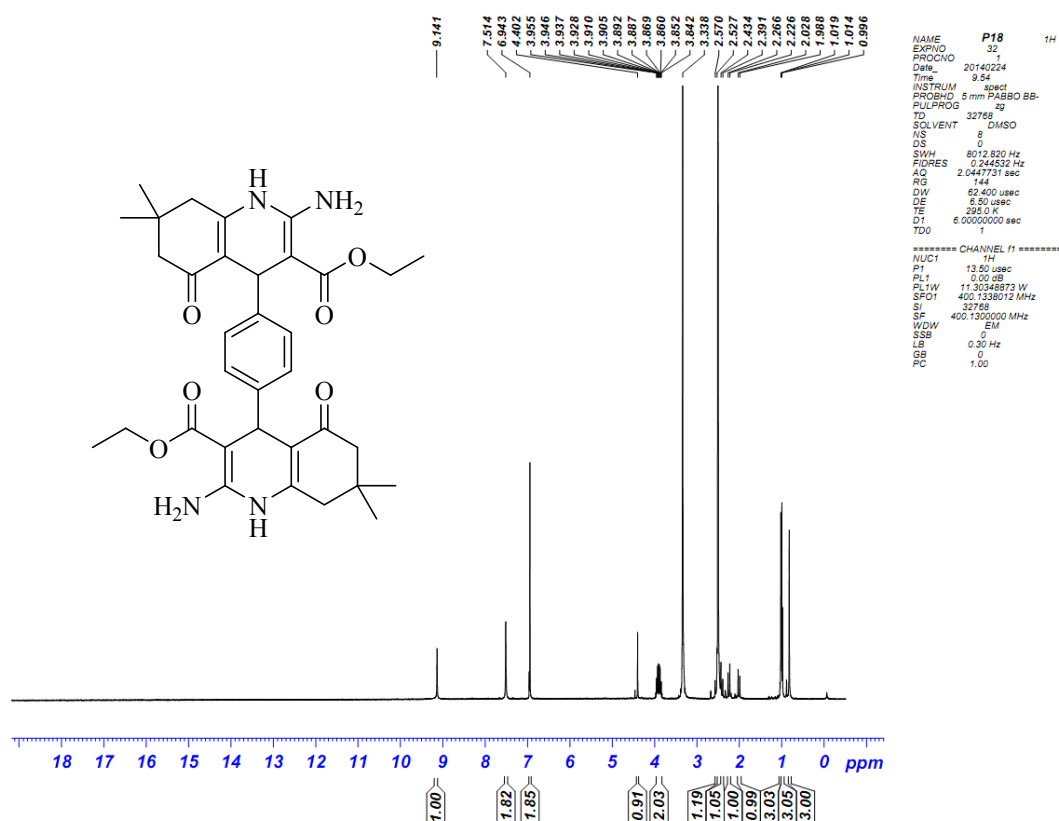

**Fig. S108.** The  $^1\text{H}$  NMR spectrum of diethyl 4,4'-(1,4-phenylene)bis(2-amino-7,7-dimethyl-5-oxo-1,4,5,6,7,8-hexahydroquinoline-3-carboxylate) (**7e**)

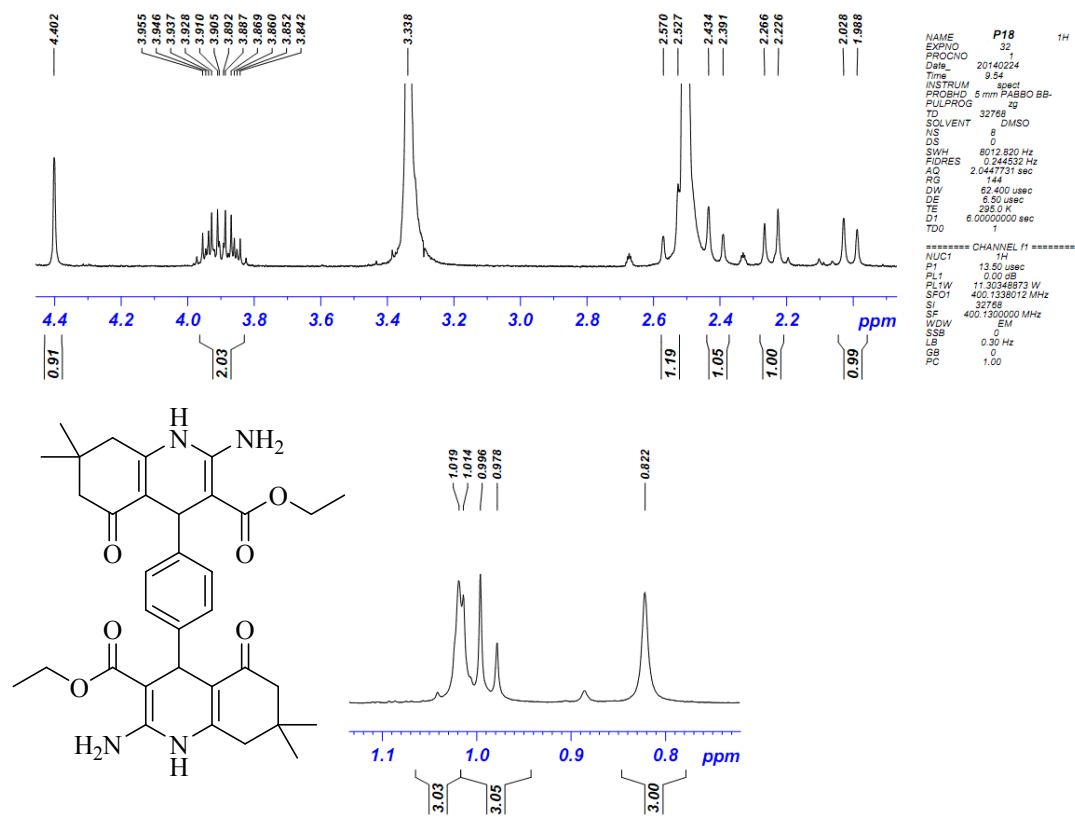

**Fig. S109.** The  $^{13}\text{C}$  NMR spectrum of diethyl 4,4'-(1,4-phenylene)bis(2-amino-7,7-dimethyl-5-oxo-1,4,5,6,7,8-hexahydroquinoline-3-carboxylate) (**7e**)

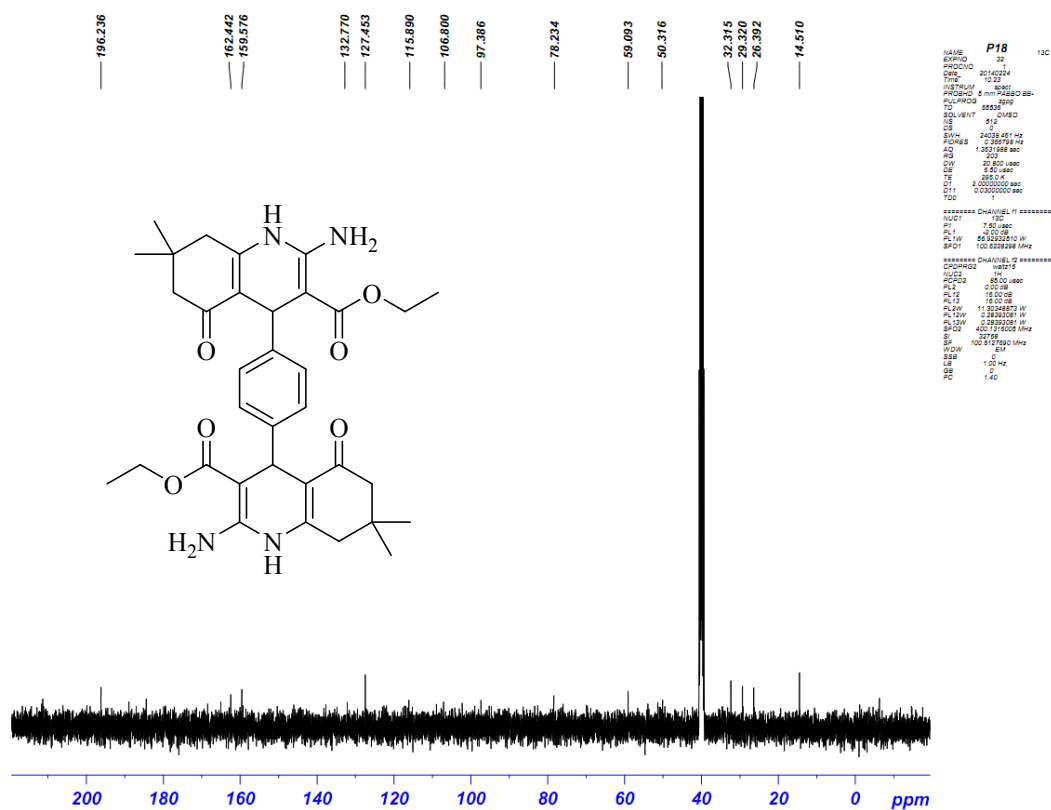

**Fig. S110.** The Mass spectrum of diethyl 4,4'-(1,4-phenylene)bis(2-amino-7,7-dimethyl-5-oxo-1,4,5,6,7,8-hexahydroquinoline-3-carboxylate) (**7e**)

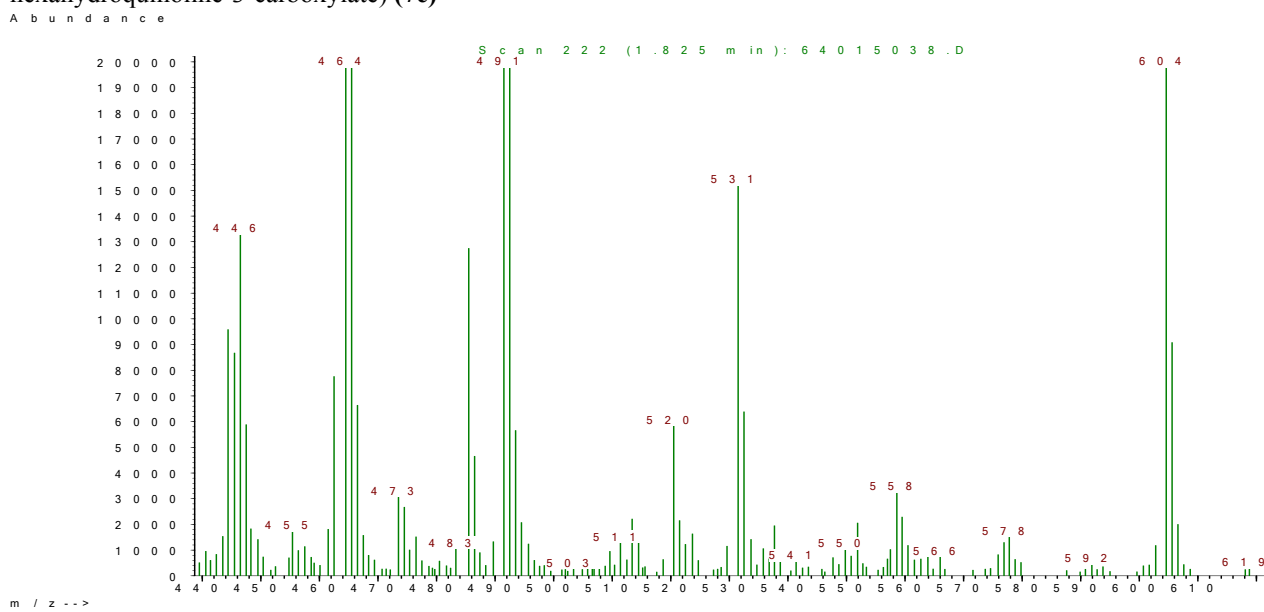

**Fig. S111.** The IR spectrum of ethyl 2-amino-4-(2,5-dimethoxyphenyl)-7,7-dimethyl-5-oxo-1,4,5,6,7,8-hexahydroquinoline-3-carboxylate (**7f**)

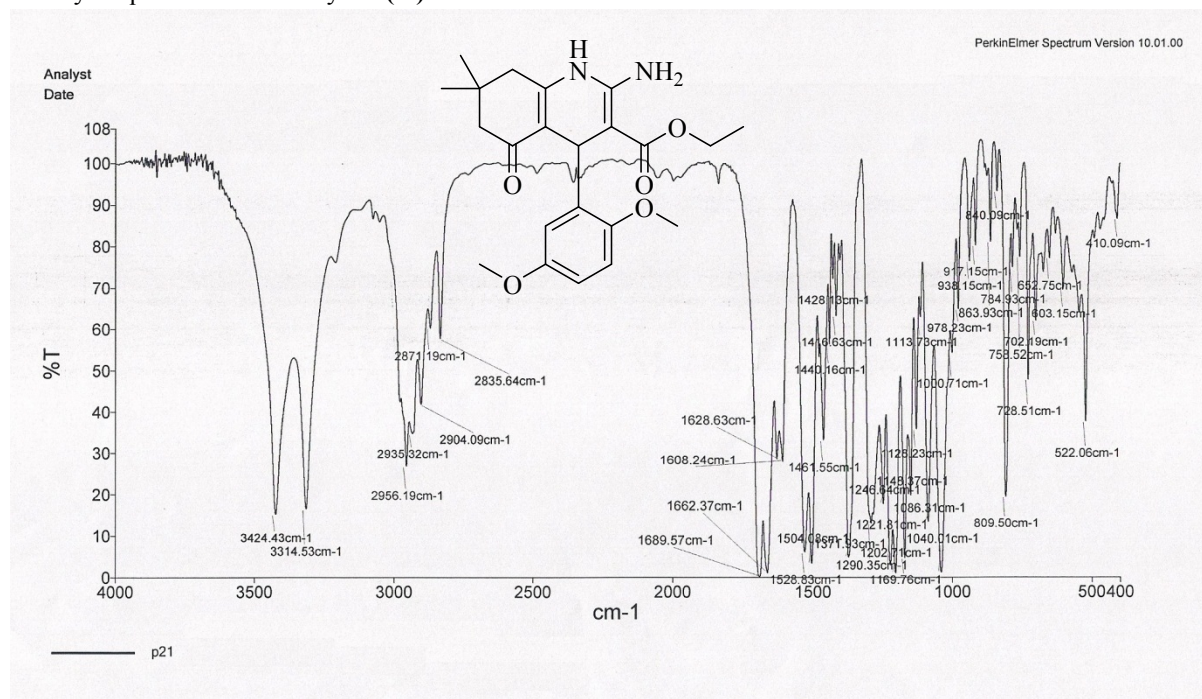

**Fig. S112.** The <sup>1</sup>H NMR spectrum of ethyl 2-amino-4-(2,5-dimethoxyphenyl)-7,7-dimethyl-5-oxo-1,4,5,6,7,8-hexahydroquinoline-3-carboxylate (**7f**)

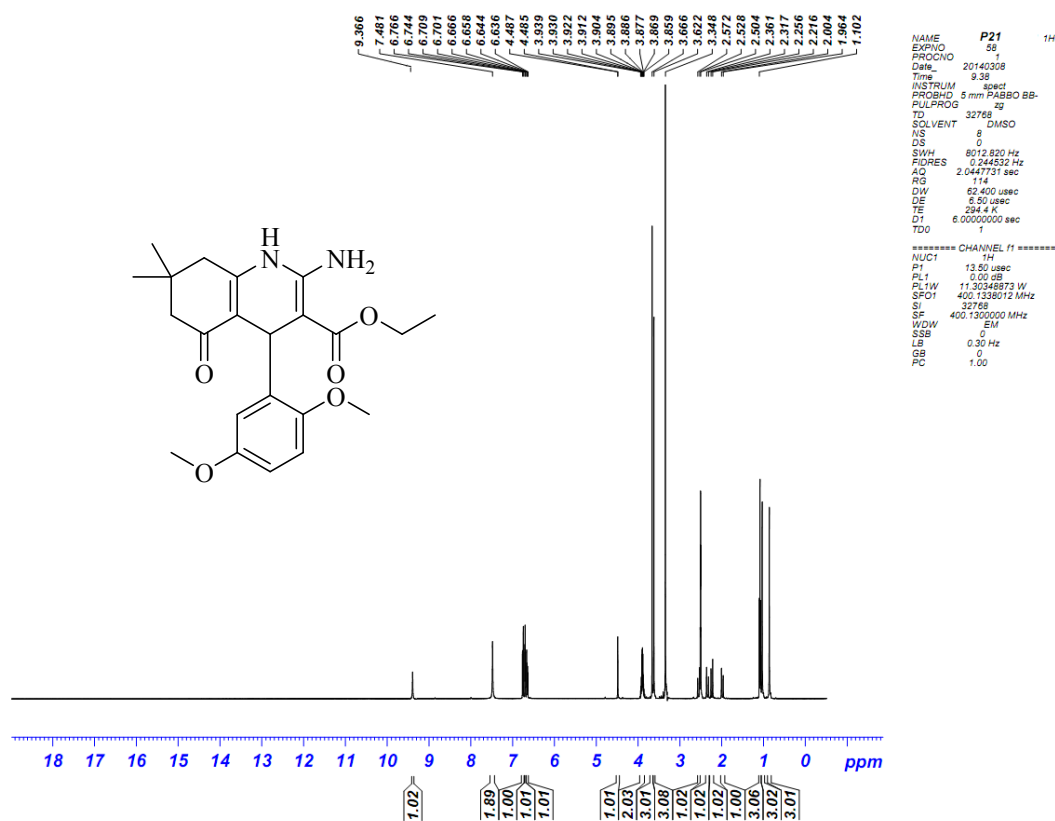

**Fig. S113.** The  $^1\text{H}$  NMR spectrum of ethyl 2-amino-4-(2,5-dimethoxyphenyl)-7,7-dimethyl-5-oxo-1,4,5,6,7,8-hexahydroquinoline-3-carboxylate (**7f**)

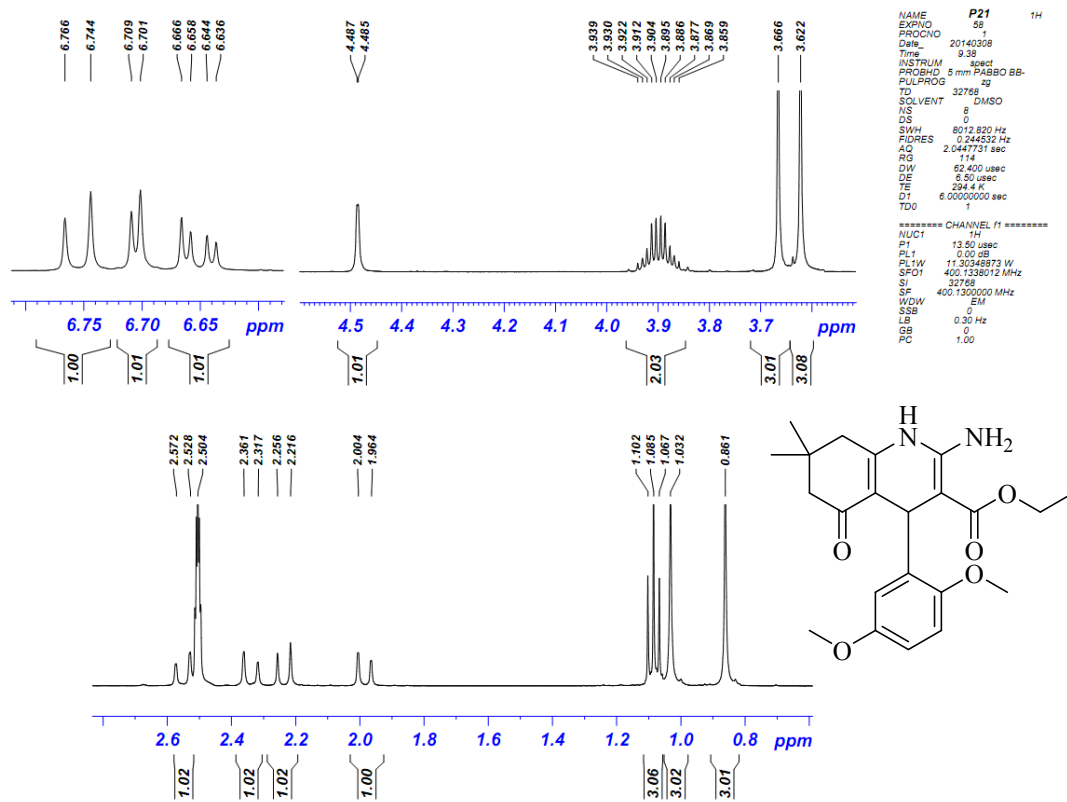

**Fig. S114.** The  $^{13}\text{C}$  NMR spectrum of ethyl 2-amino-4-(2,5-dimethoxyphenyl)-7,7-dimethyl-5-oxo-1,4,5,6,7,8-hexahydroquinoline-3-carboxylate (**7f**)

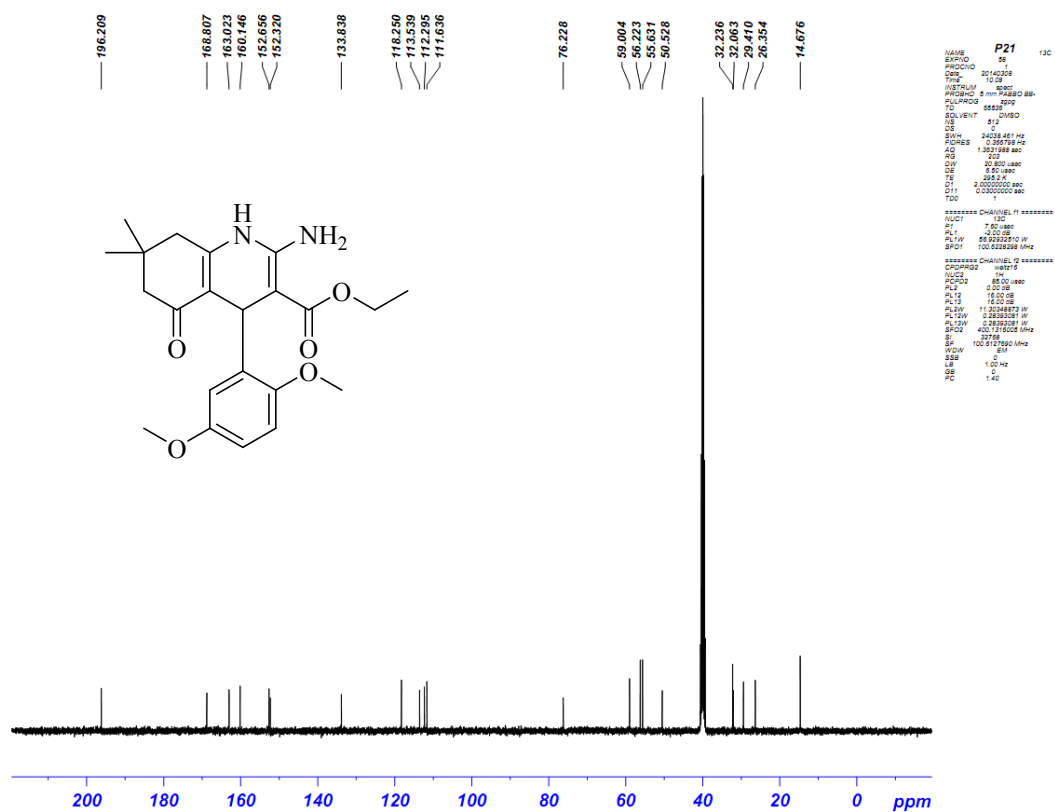

**Fig. S115.** The  $^{13}\text{C}$  NMR spectrum of ethyl 2-amino-4-(2,5-dimethoxyphenyl)-7,7-dimethyl-5-oxo-1,4,5,6,7,8-hexahydroquinoline-3-carboxylate (**7f**)

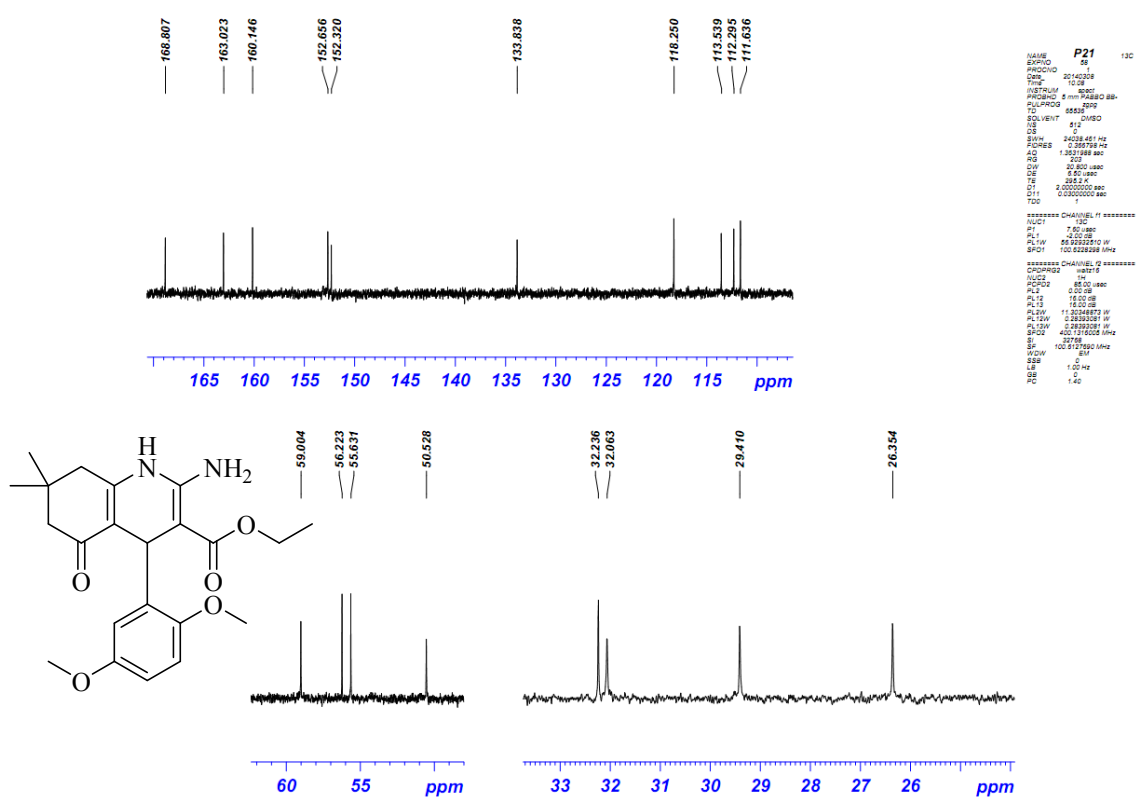

**Fig. S116.** The Mass spectrum of ethyl 2-amino-4-(2,5-dimethoxyphenyl)-7,7-dimethyl-5-oxo-1,4,5,6,7,8-hexahydroquinoline-3-carboxylate (**7f**)

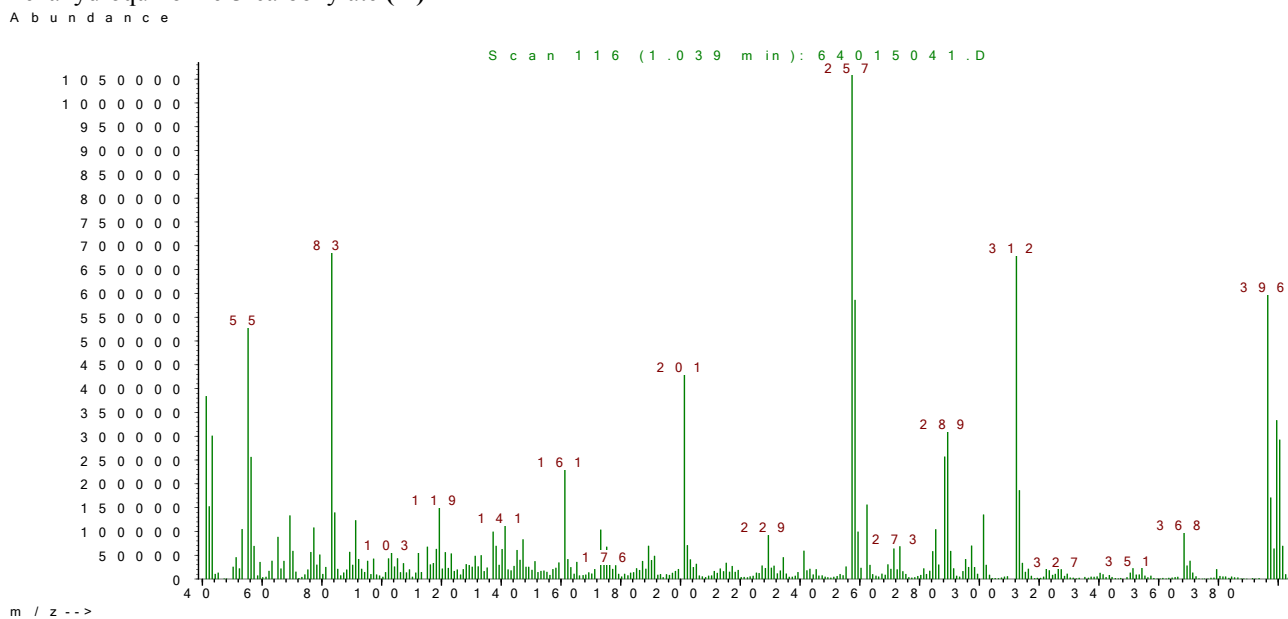

**Fig. S117.** The IR spectrum of ethyl 2-amino-7,7-dimethyl-5-oxo-4-(1-phenylprop-1-en-2-yl)-1,4,5,6,7,8-hexahydroquinoline-3-carboxylate (**7g**)

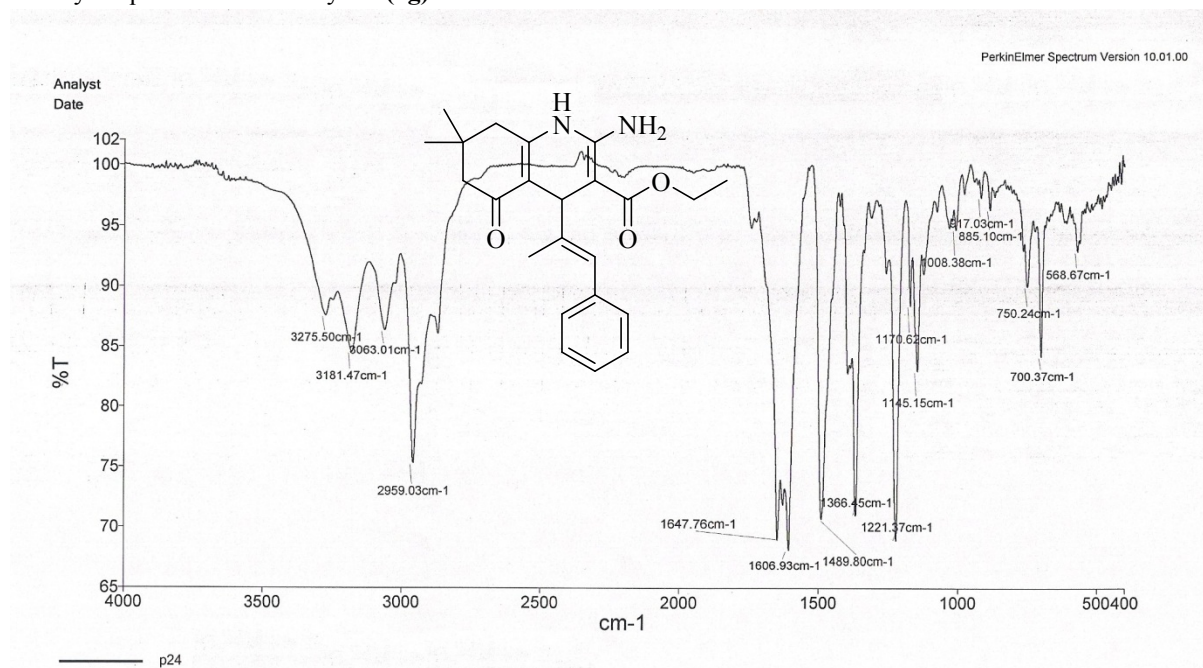

**Fig. S118.** The <sup>1</sup>H NMR spectrum of ethyl 2-amino-7,7-dimethyl-5-oxo-4-(1-phenylprop-1-en-2-yl)-1,4,5,6,7,8-hexahydroquinoline-3-carboxylate (**7g**)

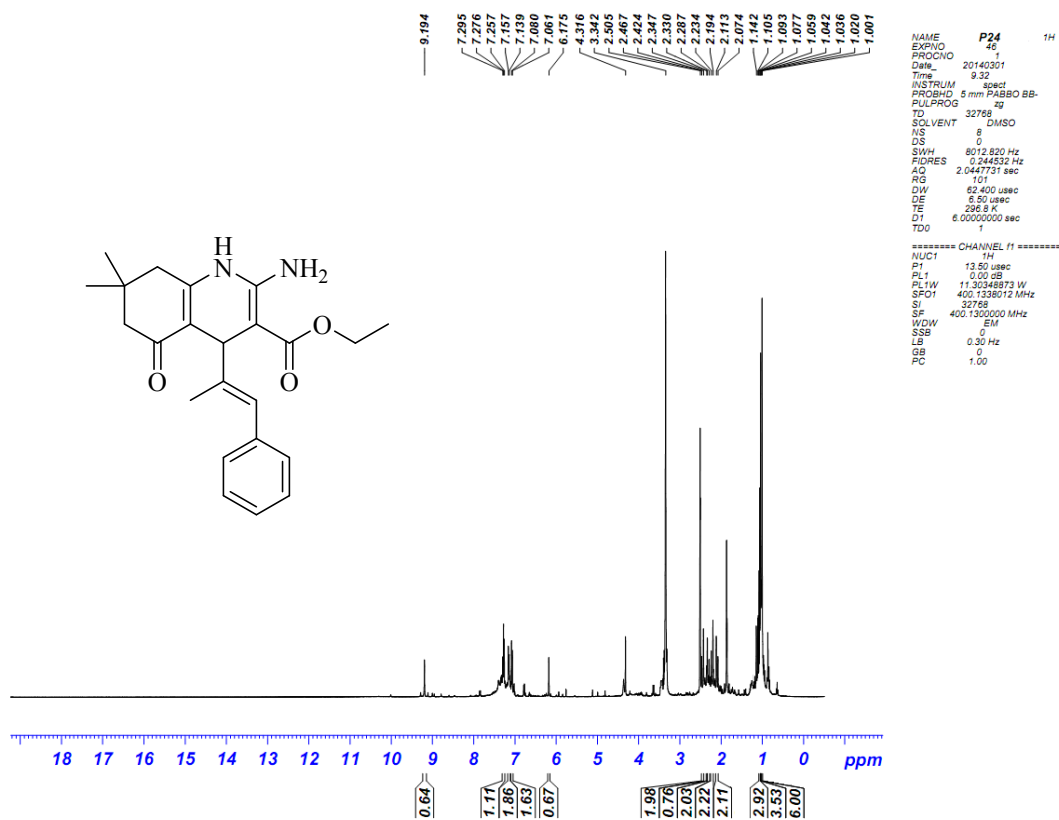



**Fig. S119.** The  $^1\text{H}$  NMR spectrum of ethyl 2-amino-7,7-dimethyl-5-oxo-4-(1-phenylprop-1-en-2-yl)-1,4,5,6,7,8-hexahydroquinoline-3-carboxylate (**7g**)

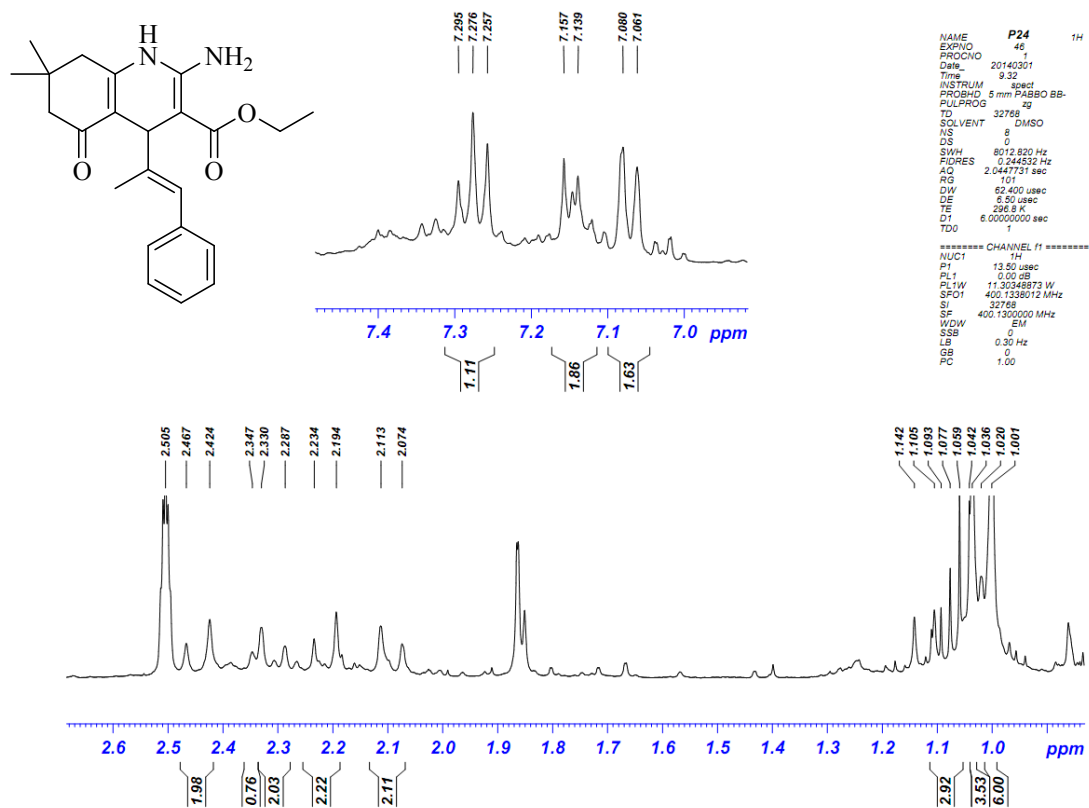

**Fig. S120.** The  $^{13}\text{C}$  NMR spectrum of ethyl 2-amino-7,7-dimethyl-5-oxo-4-(1-phenylprop-1-en-2-yl)-1,4,5,6,7,8-hexahydroquinoline-3-carboxylate (**7g**)

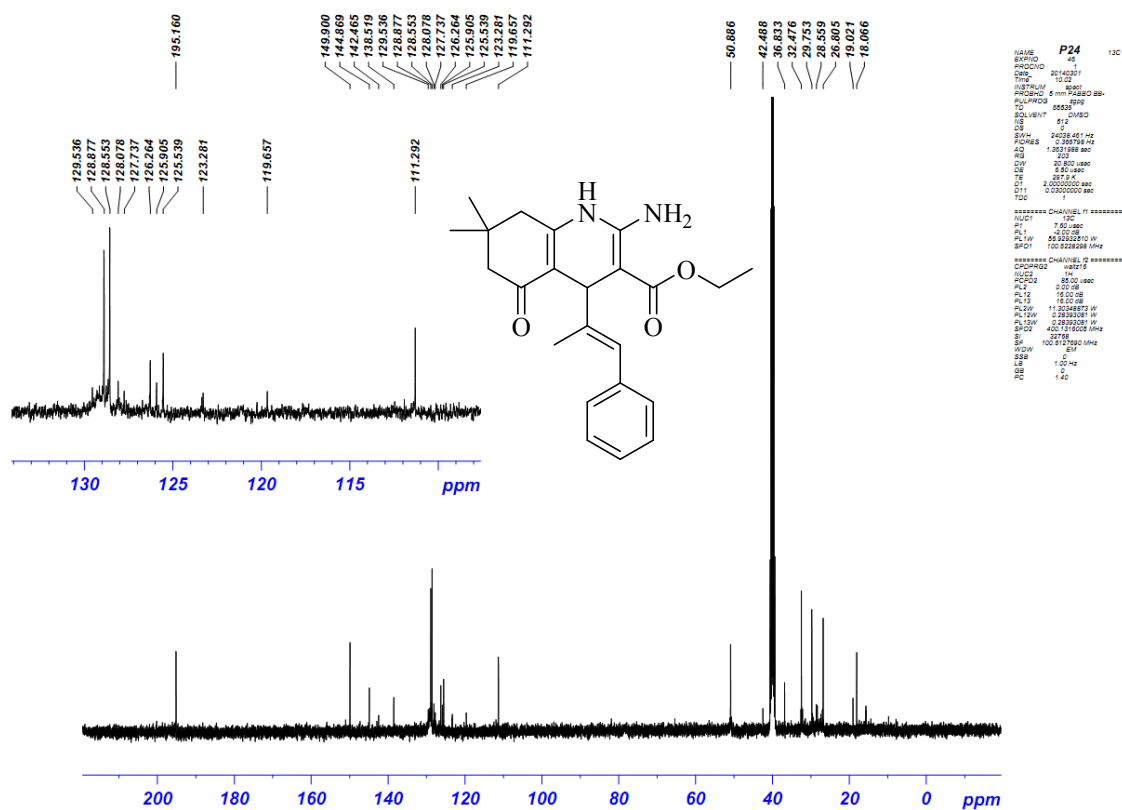

**Fig. S121.** The Mass spectrum of ethyl 2-amino-7,7-dimethyl-5-oxo-4-(1-phenylprop-1-en-2-yl)-1,4,5,6,7,8-hexahydroquinoline-3-carboxylate (**7g**)

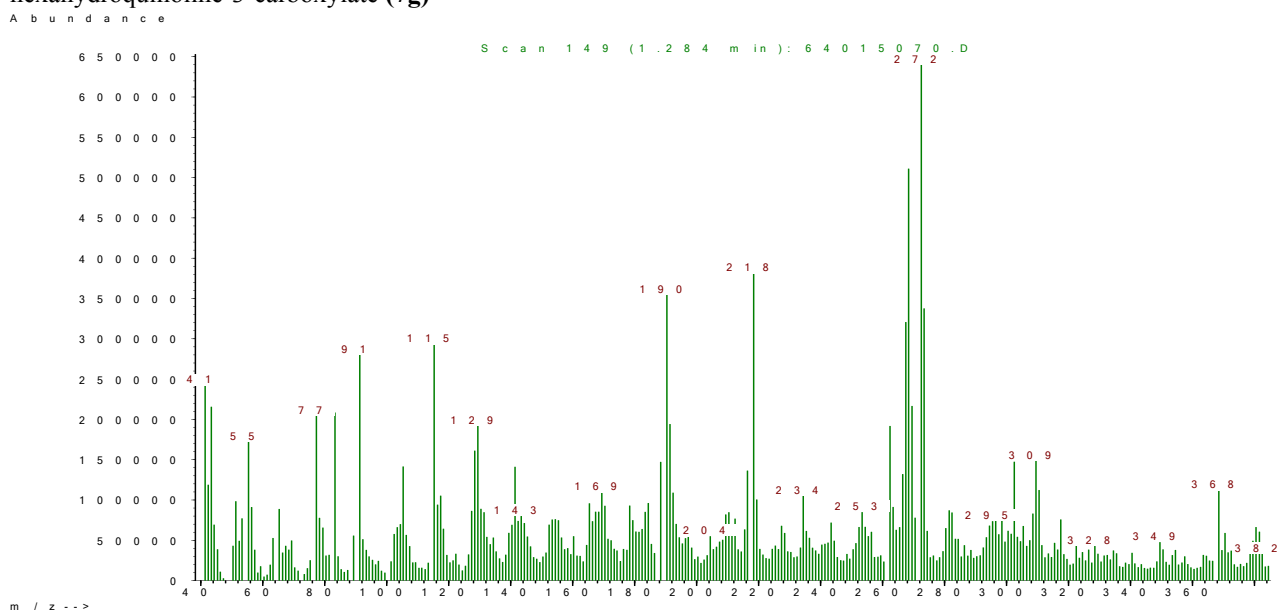

**Fig. S122.** The IR spectrum of ethyl 2-amino-4-(4-hydroxy-3-methoxyphenyl)-7,7-dimethyl-5-oxo-1,4,5,6,7,8-hexahydroquinoline-3-carboxylate (**7h**)

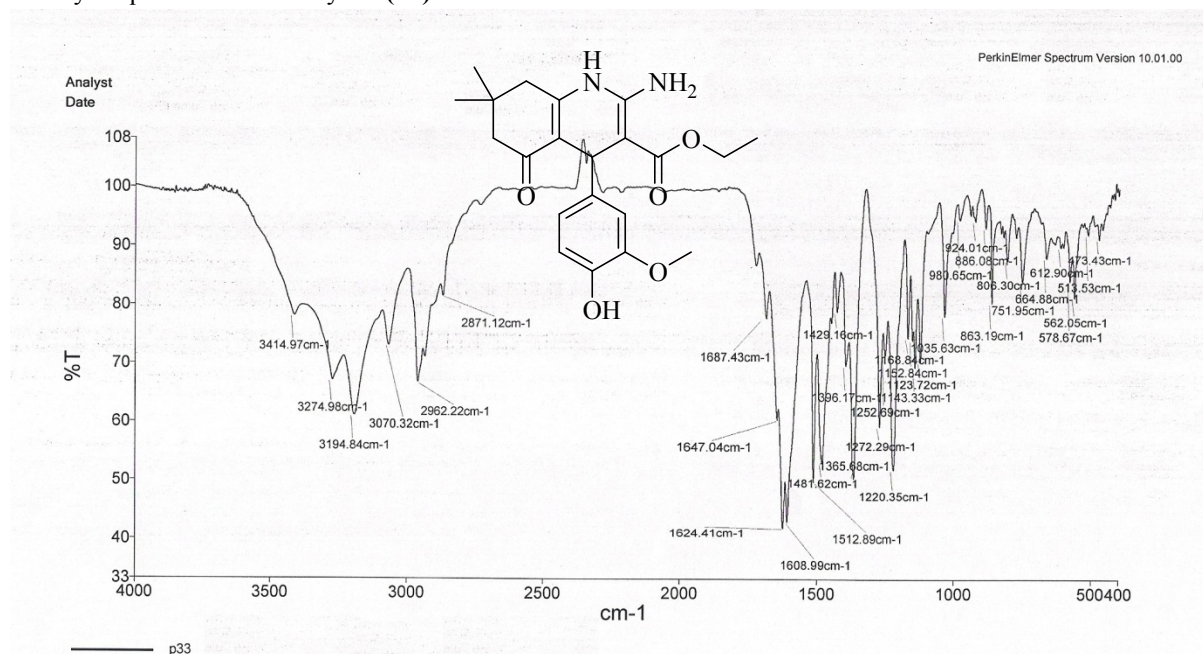

**Fig. S123.** The <sup>1</sup>H NMR spectrum of ethyl 2-amino-4-(4-hydroxy-3-methoxyphenyl)-7,7-dimethyl-5-oxo-1,4,5,6,7,8-hexahydroquinoline-3-carboxylate (**7h**)

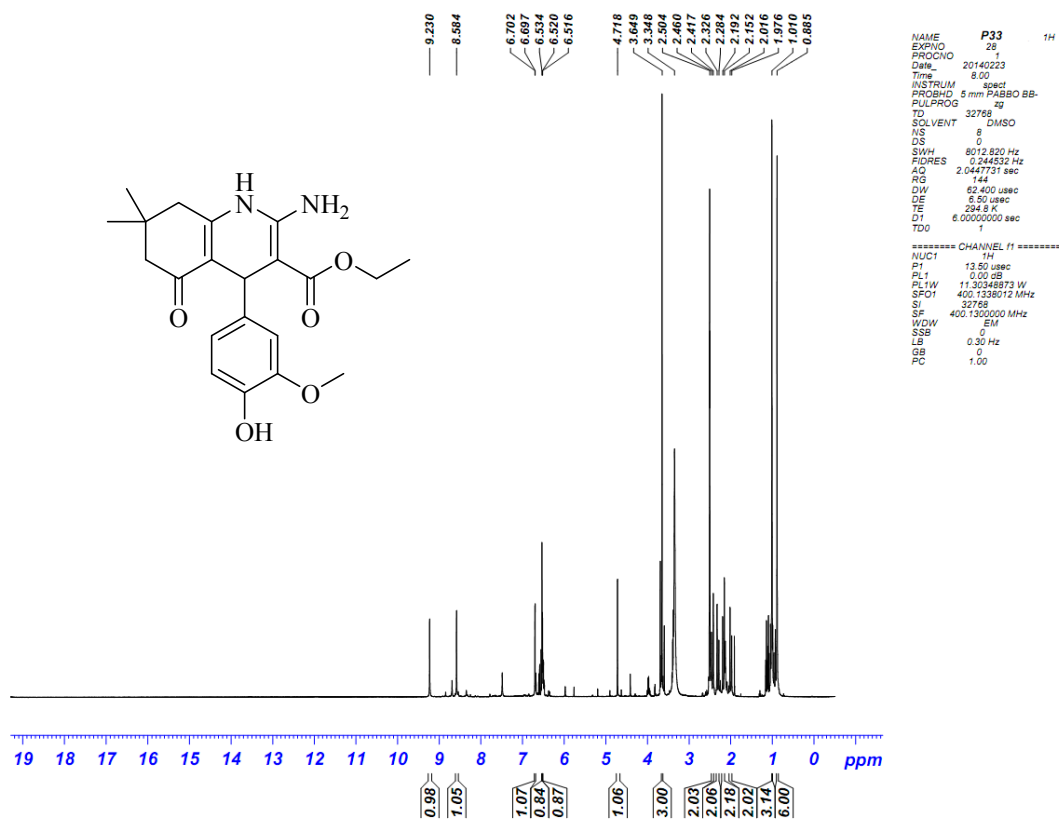

**Fig. S124.** The  $^1\text{H}$  NMR spectrum of ethyl 2-amino-4-(4-hydroxy-3-methoxyphenyl)-7,7-dimethyl-5-oxo-1,4,5,6,7,8-hexahydroquinoline-3-carboxylate (**7h**)

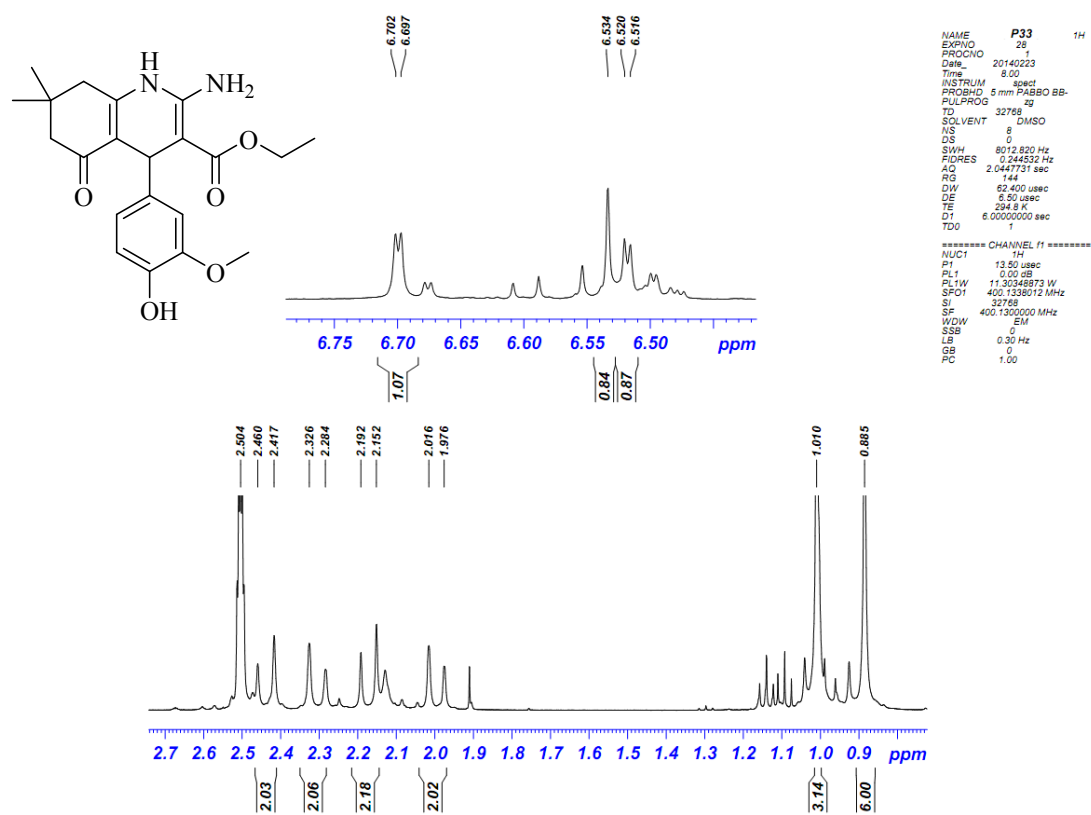

**Fig. S125.** The  $^{13}\text{C}$  NMR spectrum of ethyl 2-amino-4-(4-hydroxy-3-methoxyphenyl)-7,7-dimethyl-5-oxo-1,4,5,6,7,8-hexahydroquinoline-3-carboxylate (**7h**)

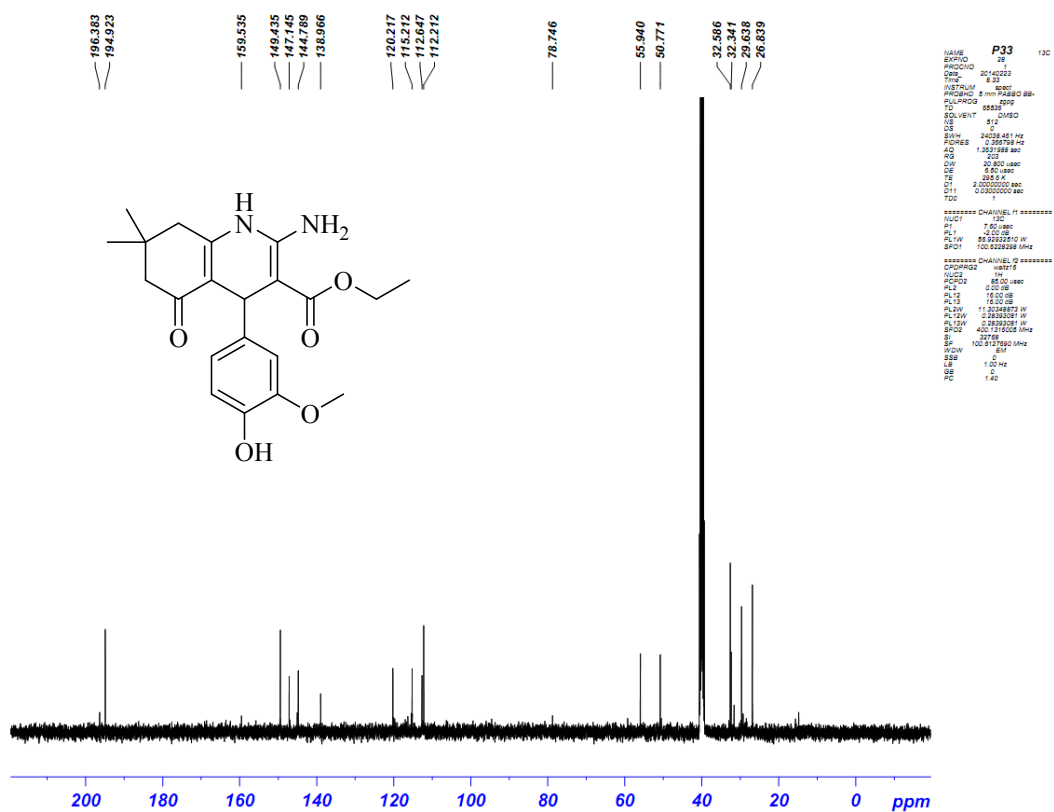

**Fig. S126.** The  $^{13}\text{C}$  NMR spectrum of ethyl 2-amino-4-(4-hydroxy-3-methoxyphenyl)-7,7-dimethyl-5-oxo-1,4,5,6,7,8-hexahydroquinoline-3-carboxylate (**7h**)

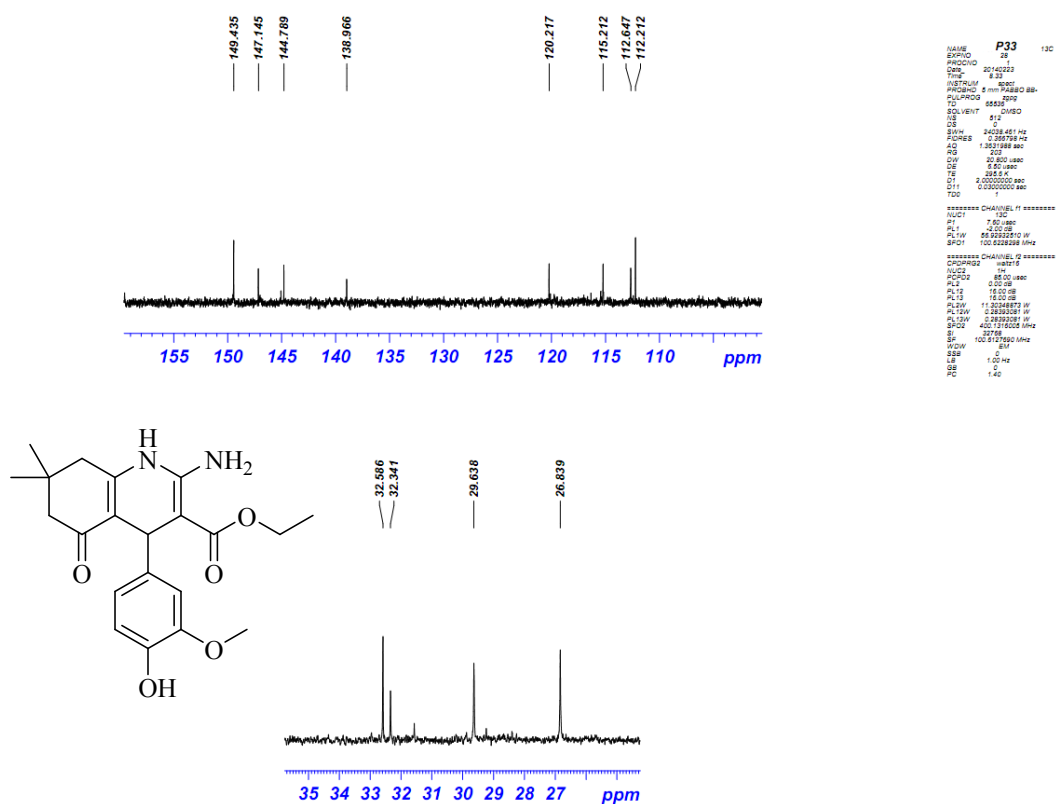

**Fig. S127.** The Mass spectrum of ethyl 2-amino-4-(4-hydroxy-3-methoxyphenyl)-7,7-dimethyl-5-oxo-1,4,5,6,7,8-hexahydroquinoline-3-carboxylate (**7h**)

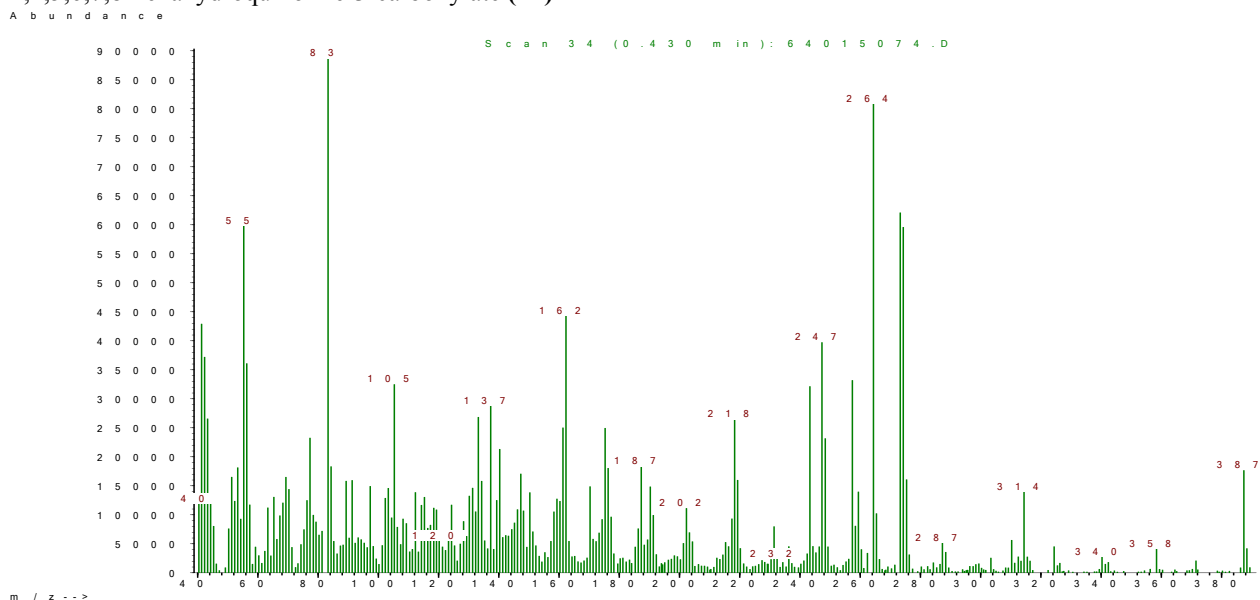

Supplement: c4ra09117e1.pdf [file c4ra09117e1.pdf]
